# Supplementary material for: Organocatalytic asymmetric Michael addition of α-alkylidene succinimides to nitrostyrenes
Source: Royal Society of Chemistry journal article supplement (doi:10.1039/c6ob00711b), 2016-01-01
Supplement: c6ob00711b1.pdf [file c6ob00711b1.pdf]

# Organocatalytic Asymmetric Michael Addition of $\alpha$ -Alkylidene Succinimides to Nitroalkenes

Bo-Liang Zhao, Dongxiang Zhang, Lei Liu and Da-Ming Du\*

*School of Chemical Engineering and Environment, Beijing Institute of Technology,  
Beijing 100081, People's Republic of China*

[dudm@bit.edu.cn](mailto:dudm@bit.edu.cn)

## *Supporting Information*

### **Contents**

|                                                                                |     |
|--------------------------------------------------------------------------------|-----|
| General procedure for the synthesis of the racemates of product <b>3</b> ..... | S1  |
| Copies of $^1\text{H}$ and $^{13}\text{C}$ NMR spectra of new compounds.....   | S2  |
| Copies of HPLC chromatograms.....                                              | S44 |

### General procedure for the synthesis of the racemates of product **3**

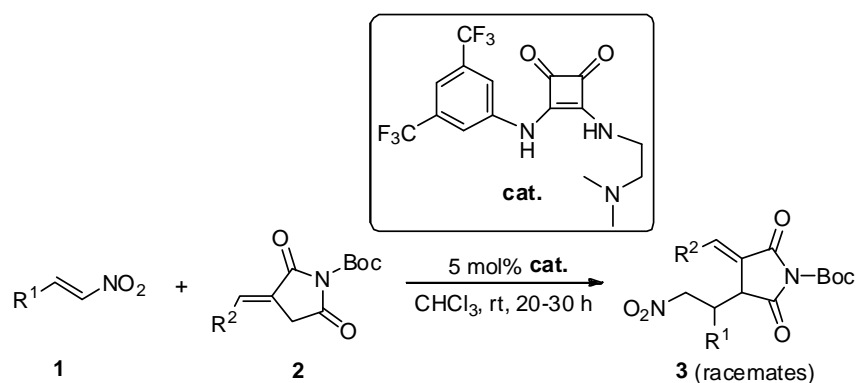

To a dried small bottle were added **2** (0.1 mmol), squaramide catalyst (2.0 mg, 0.005 mmol, 5 mol %) and  $\text{CHCl}_3$  (0.5 mL). The reaction mixture was stirred at room temperature for 15 min, and **1** was then added. After stirring at room temperature for 20–30 h, the reaction mixture was concentrated and directly purified by silica gel column chromatography to afford the racemates of **3**.

Copies of  $^1\text{H}$  and  $^{13}\text{C}$  NMR spectra of new compounds

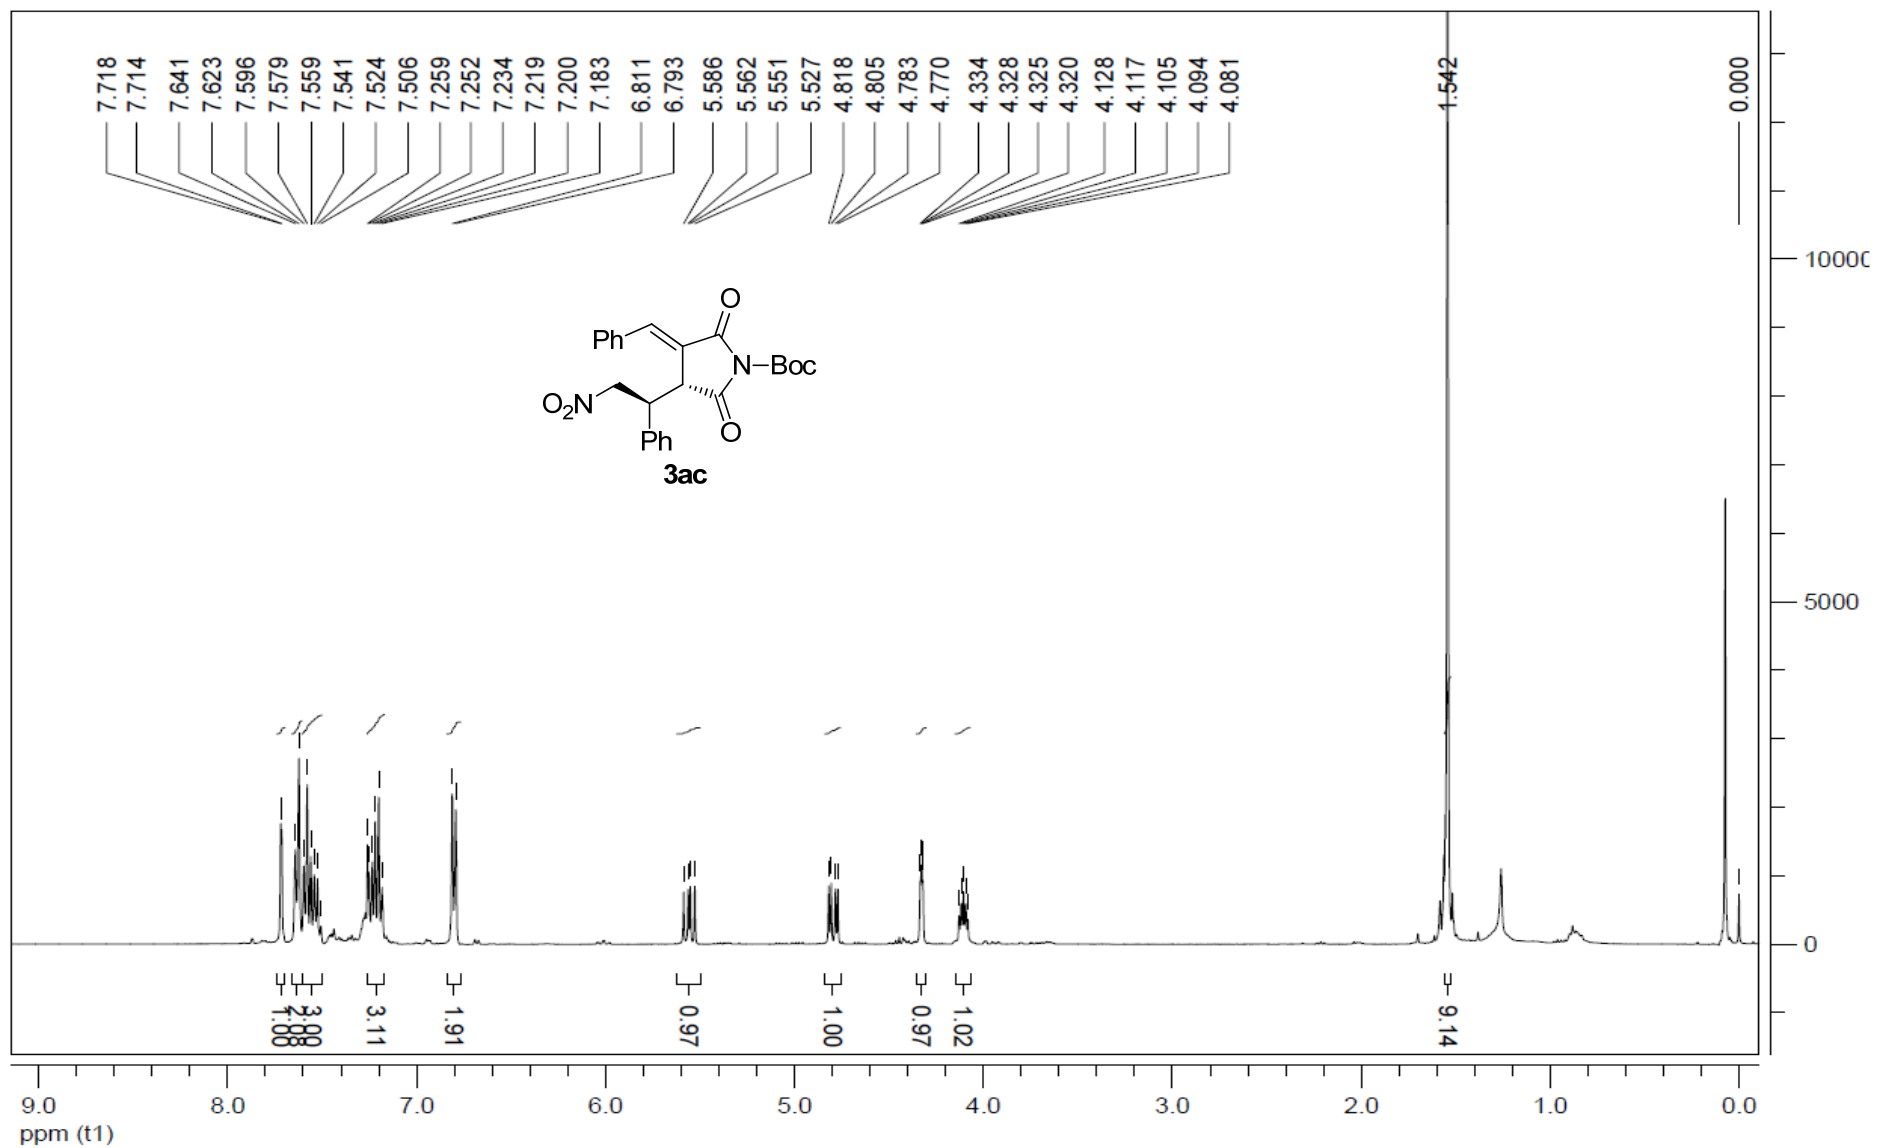

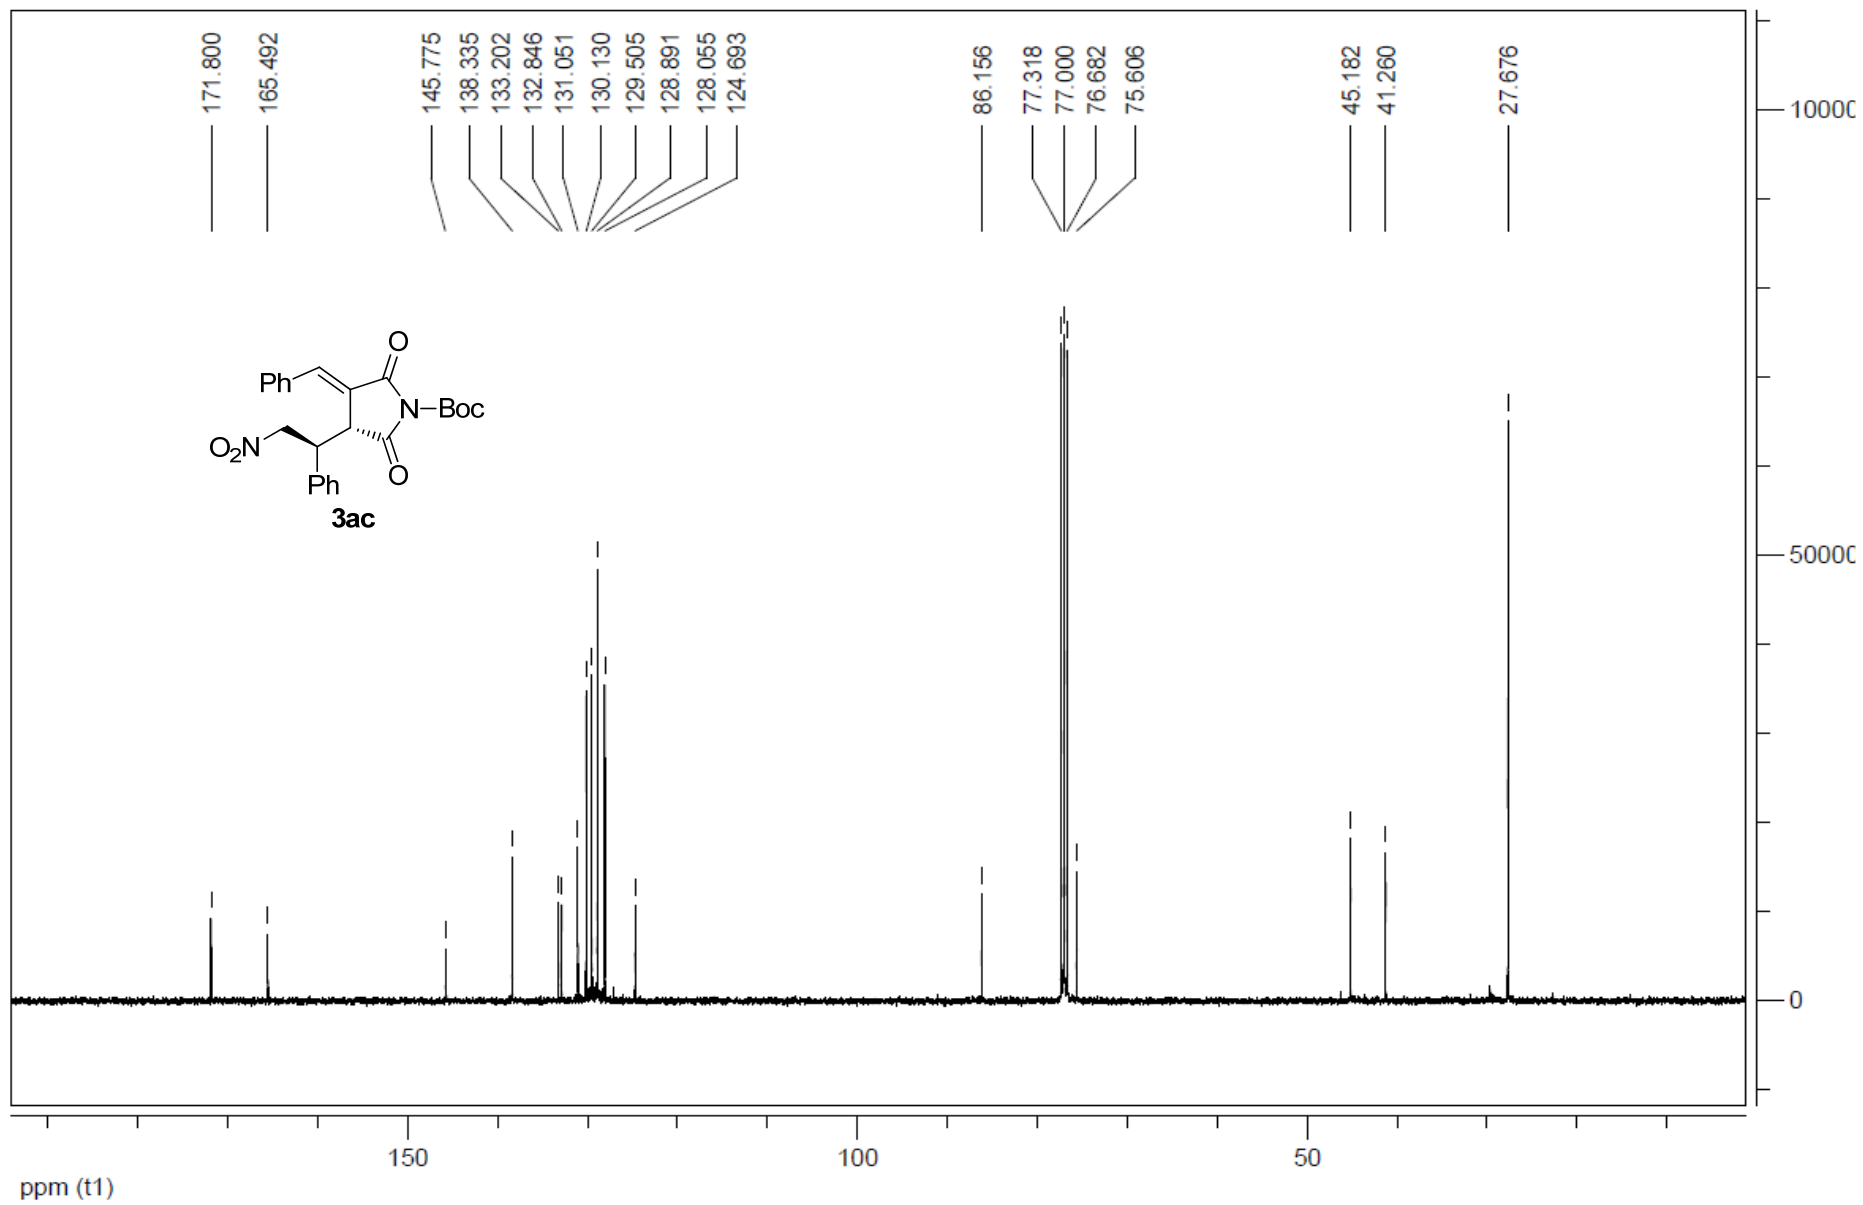



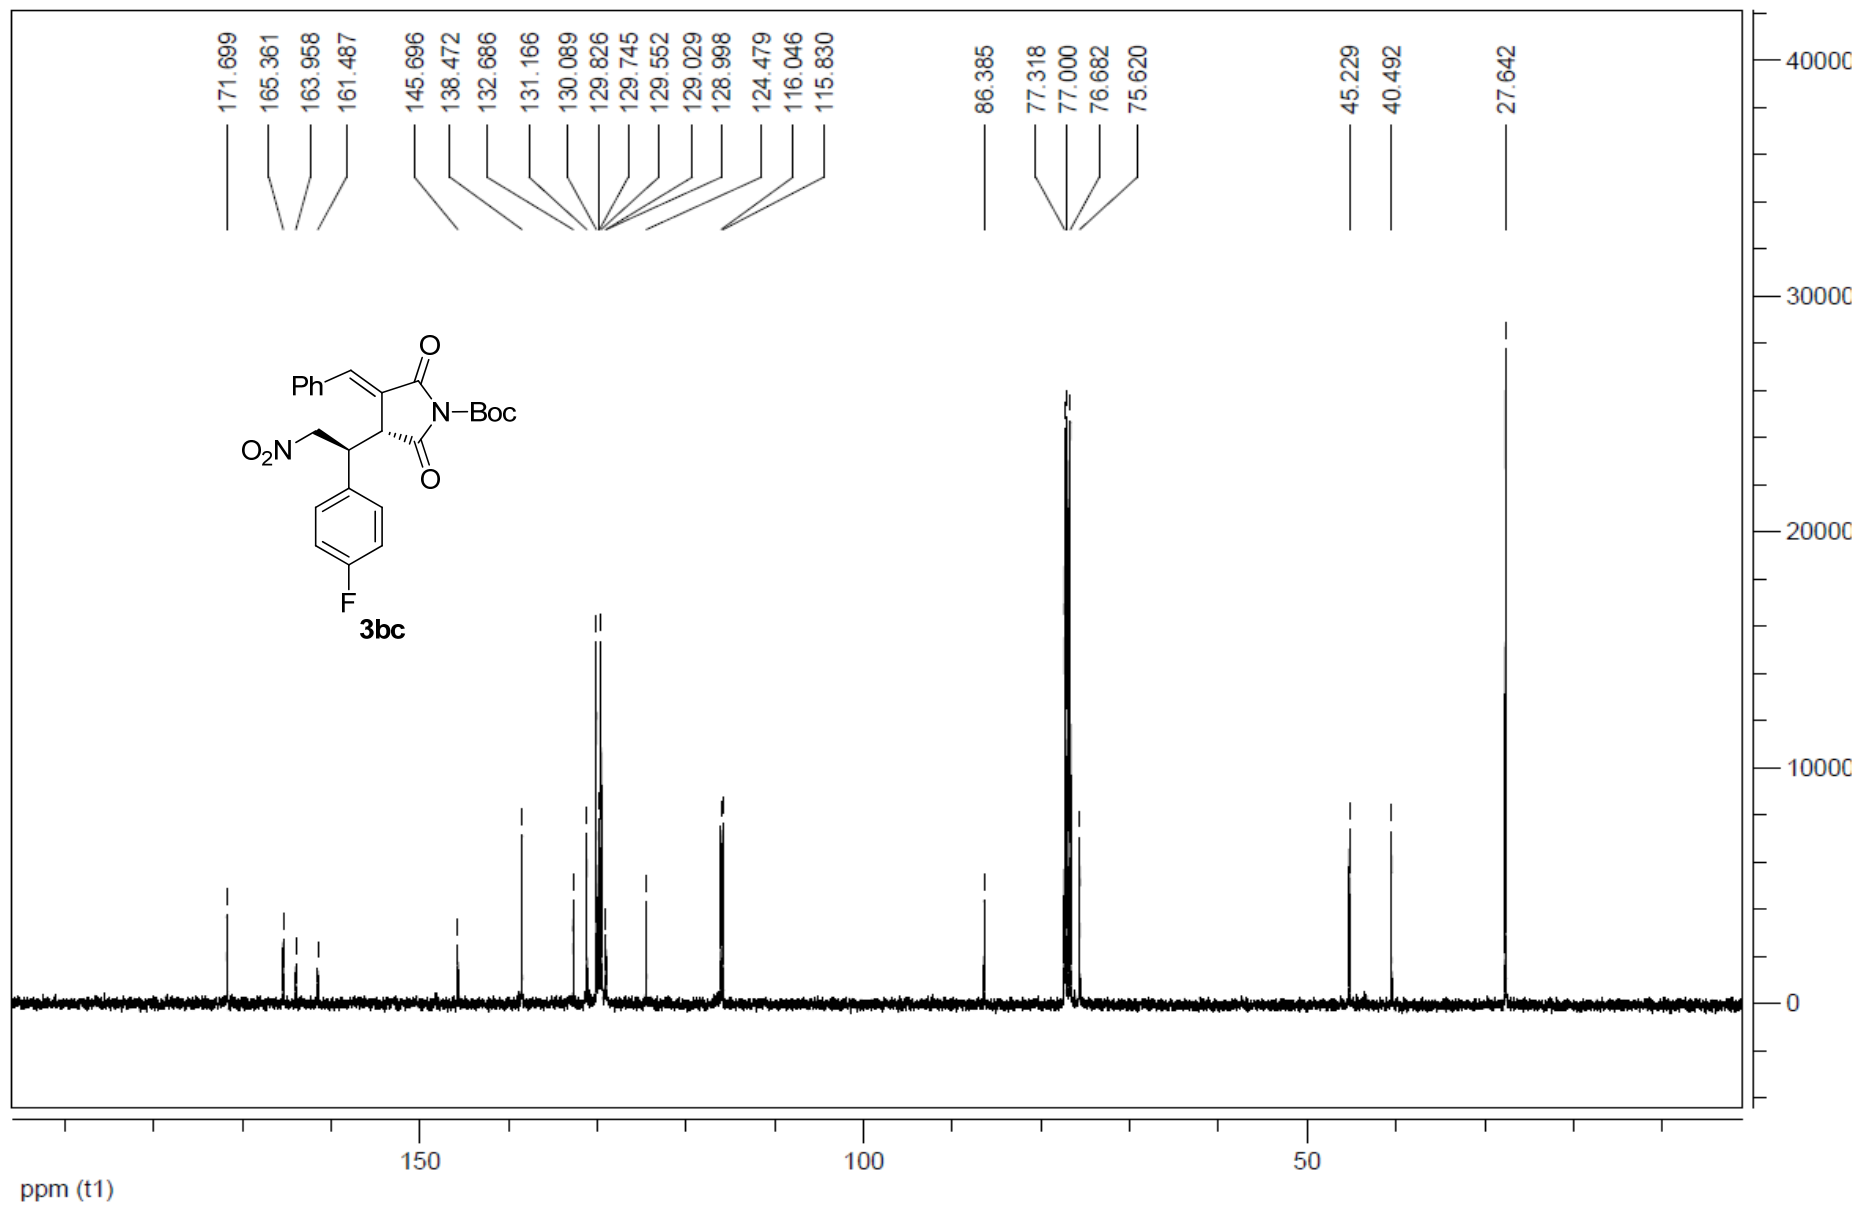

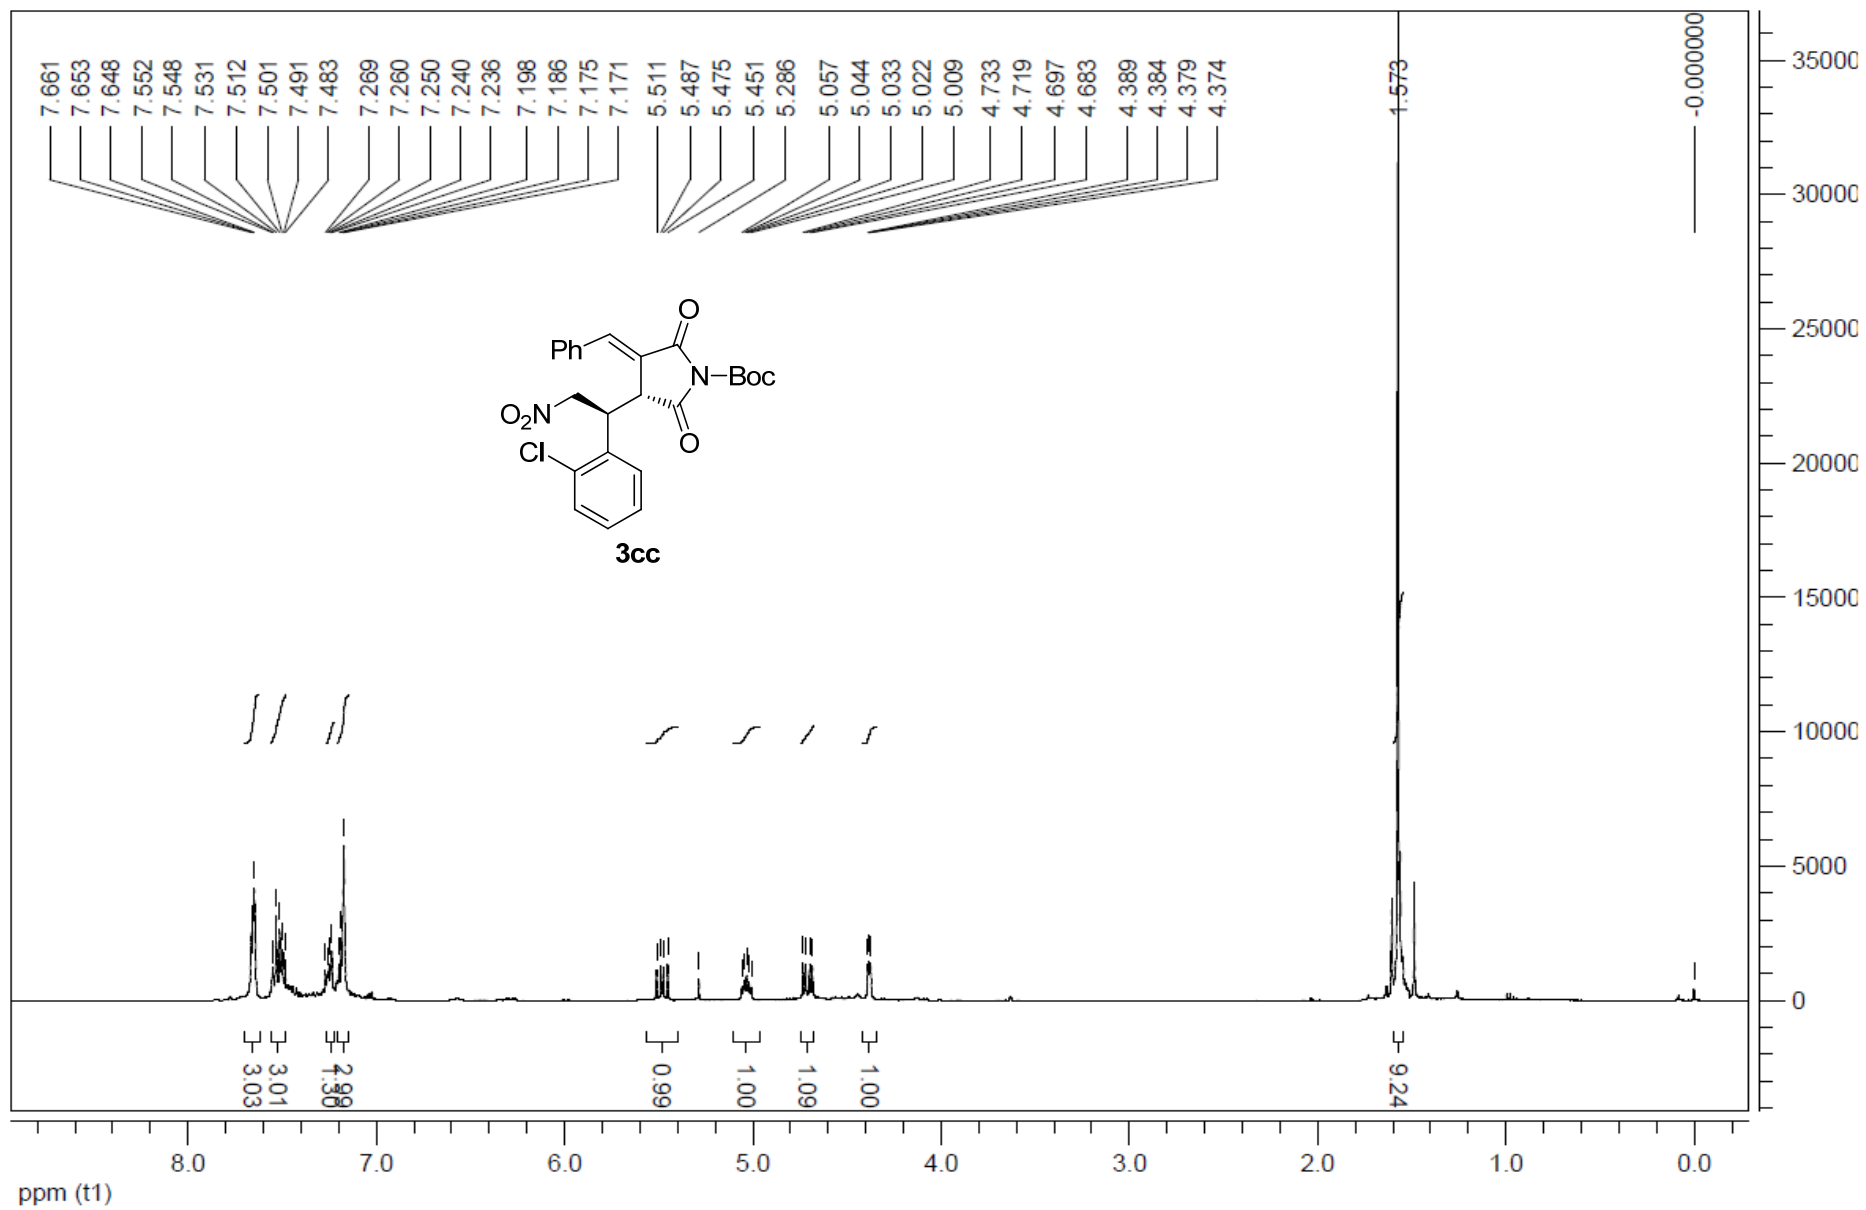

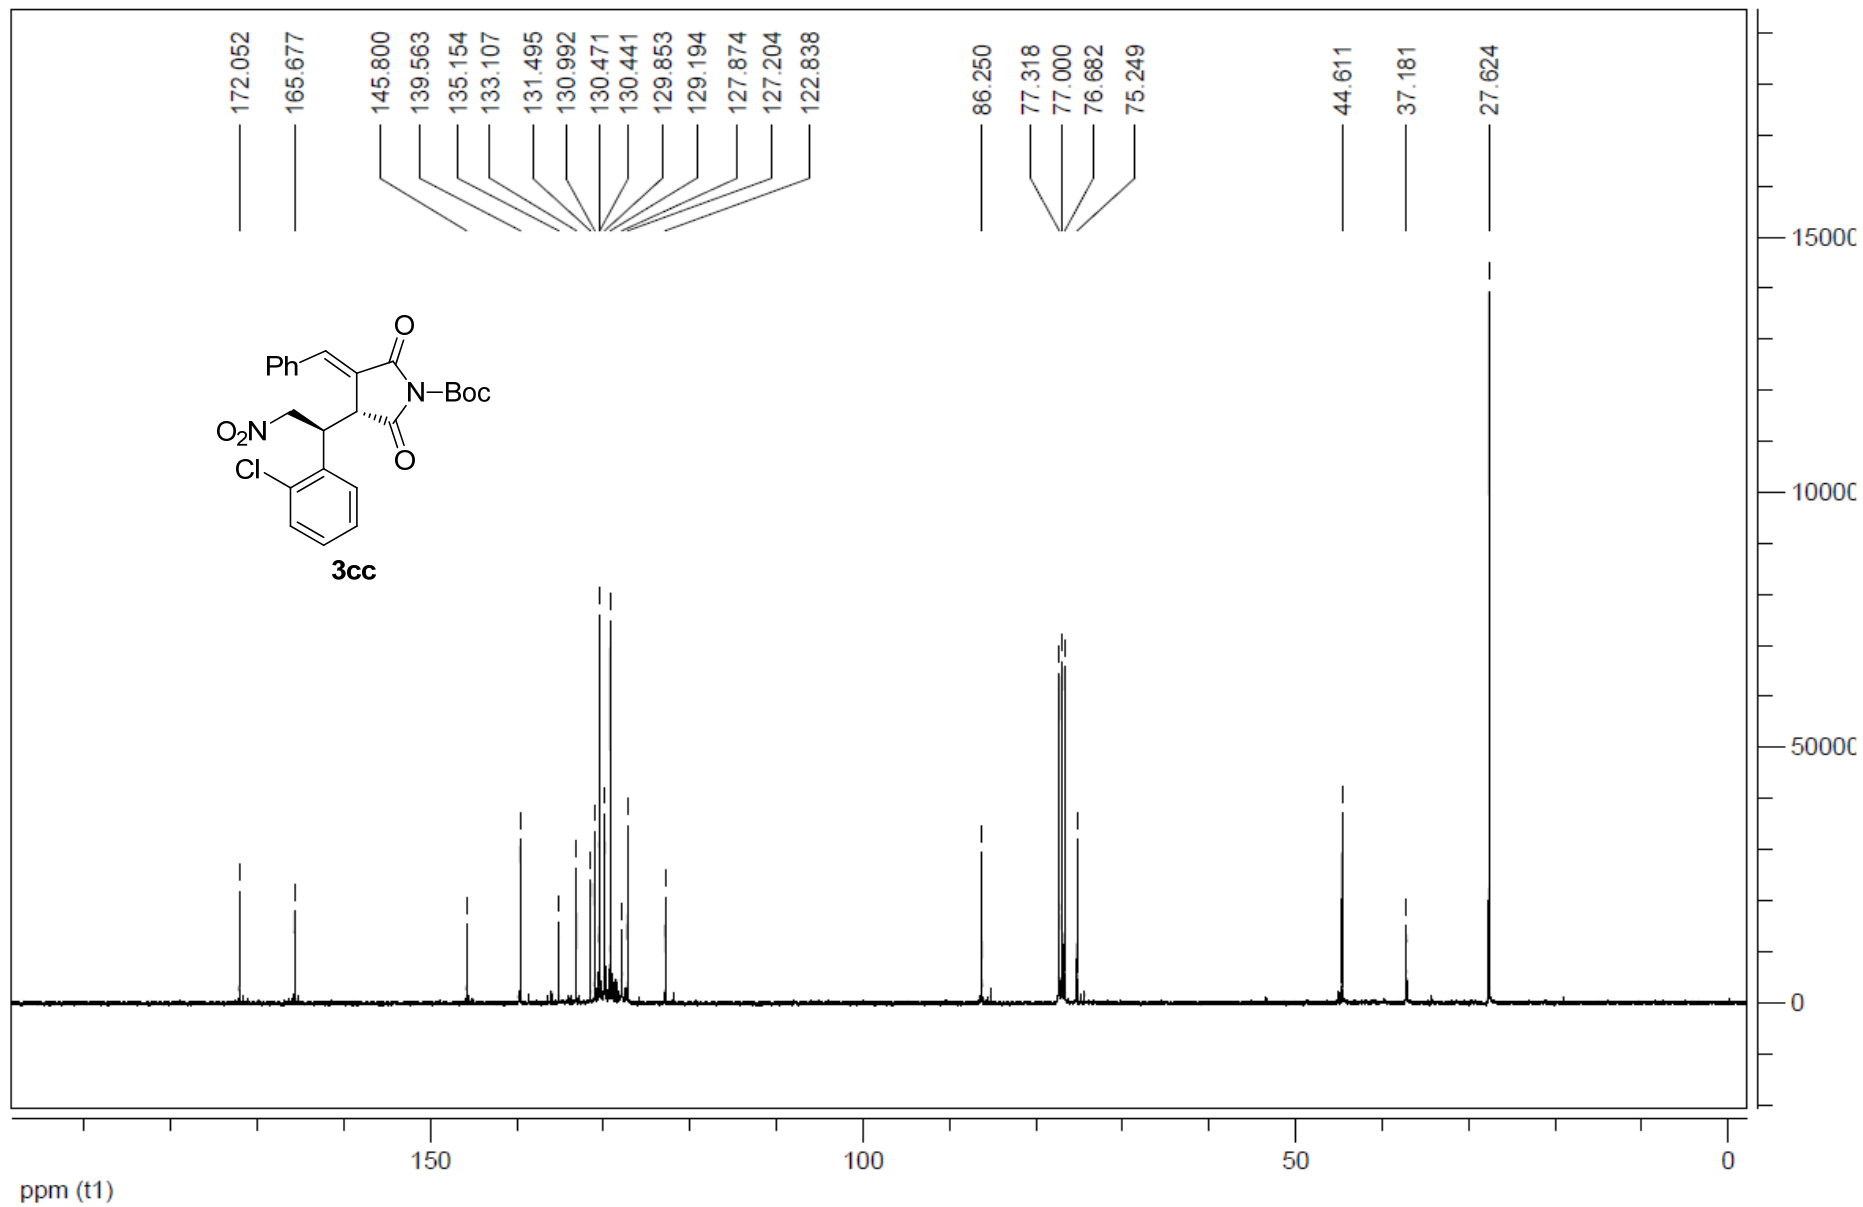



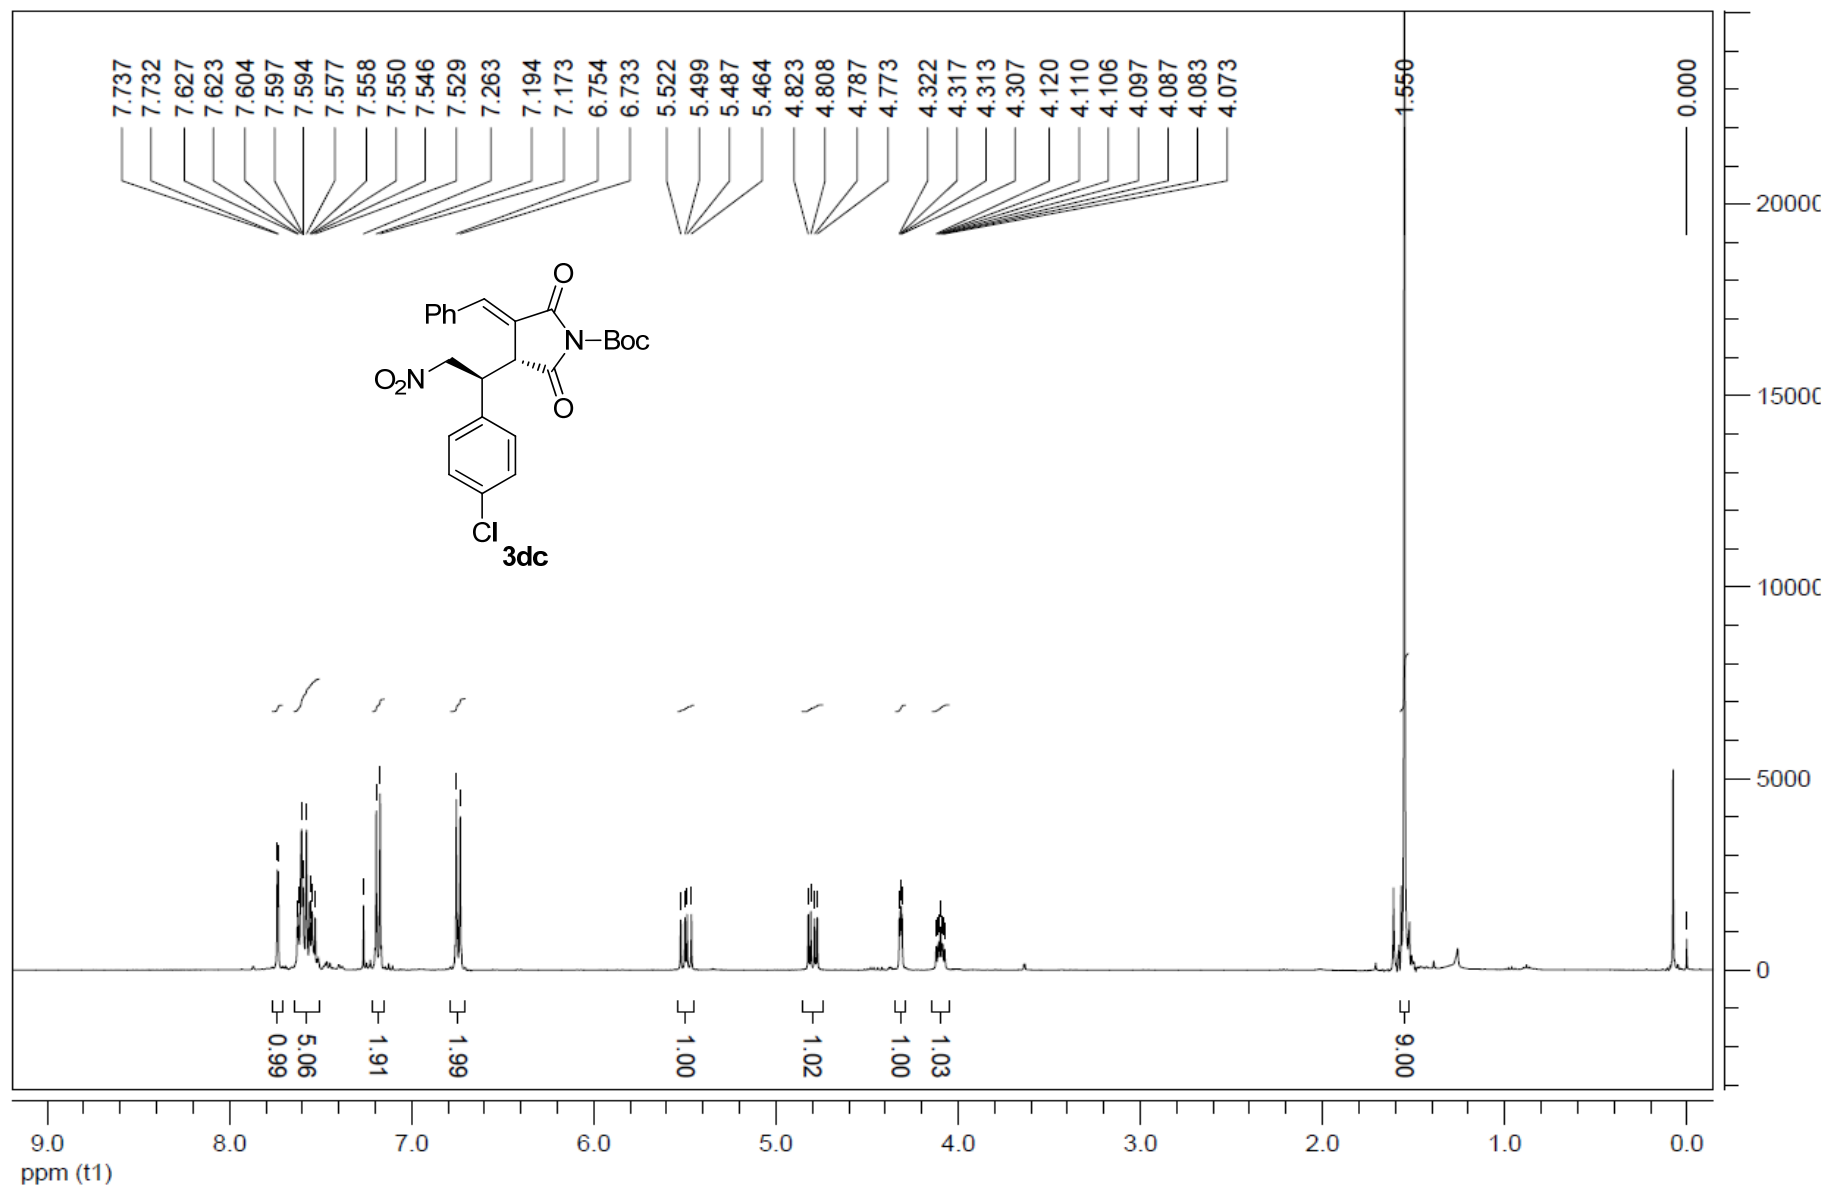

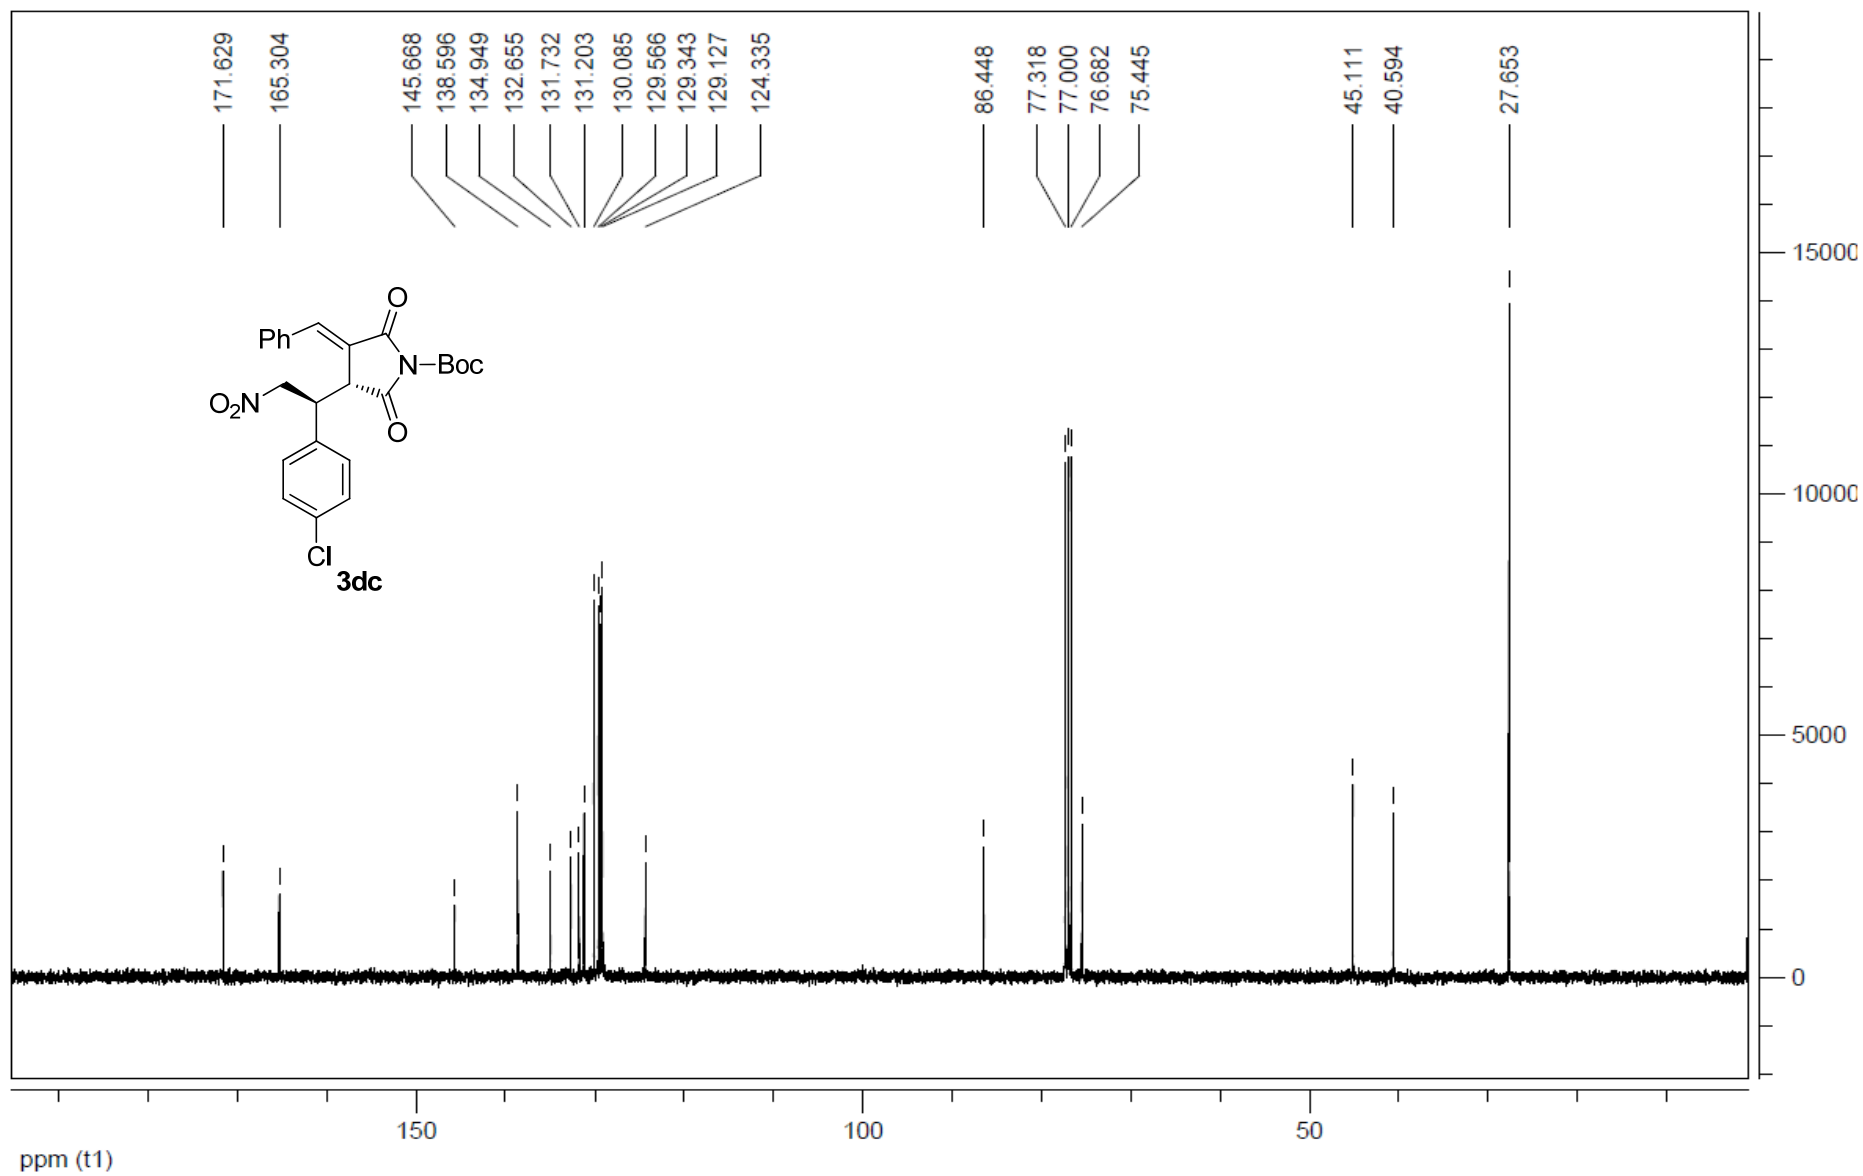

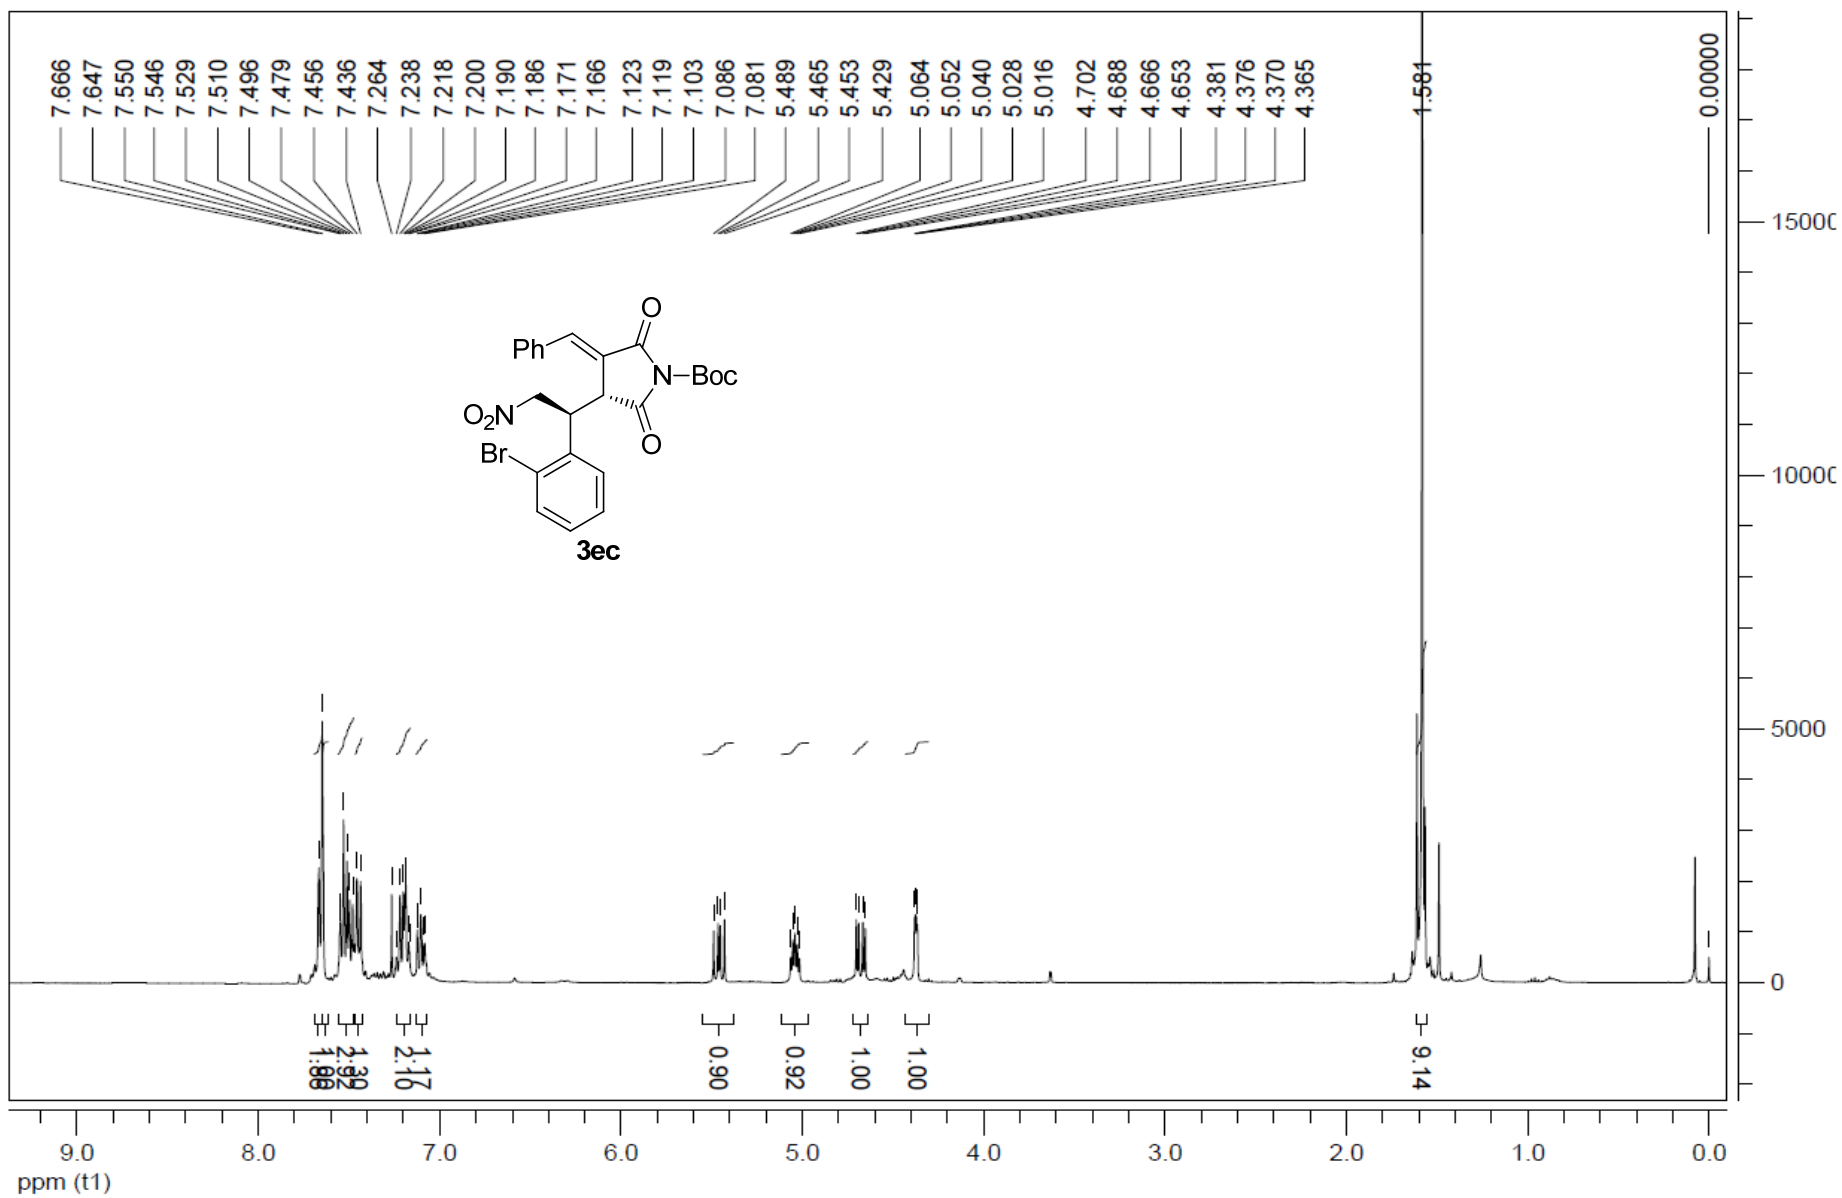

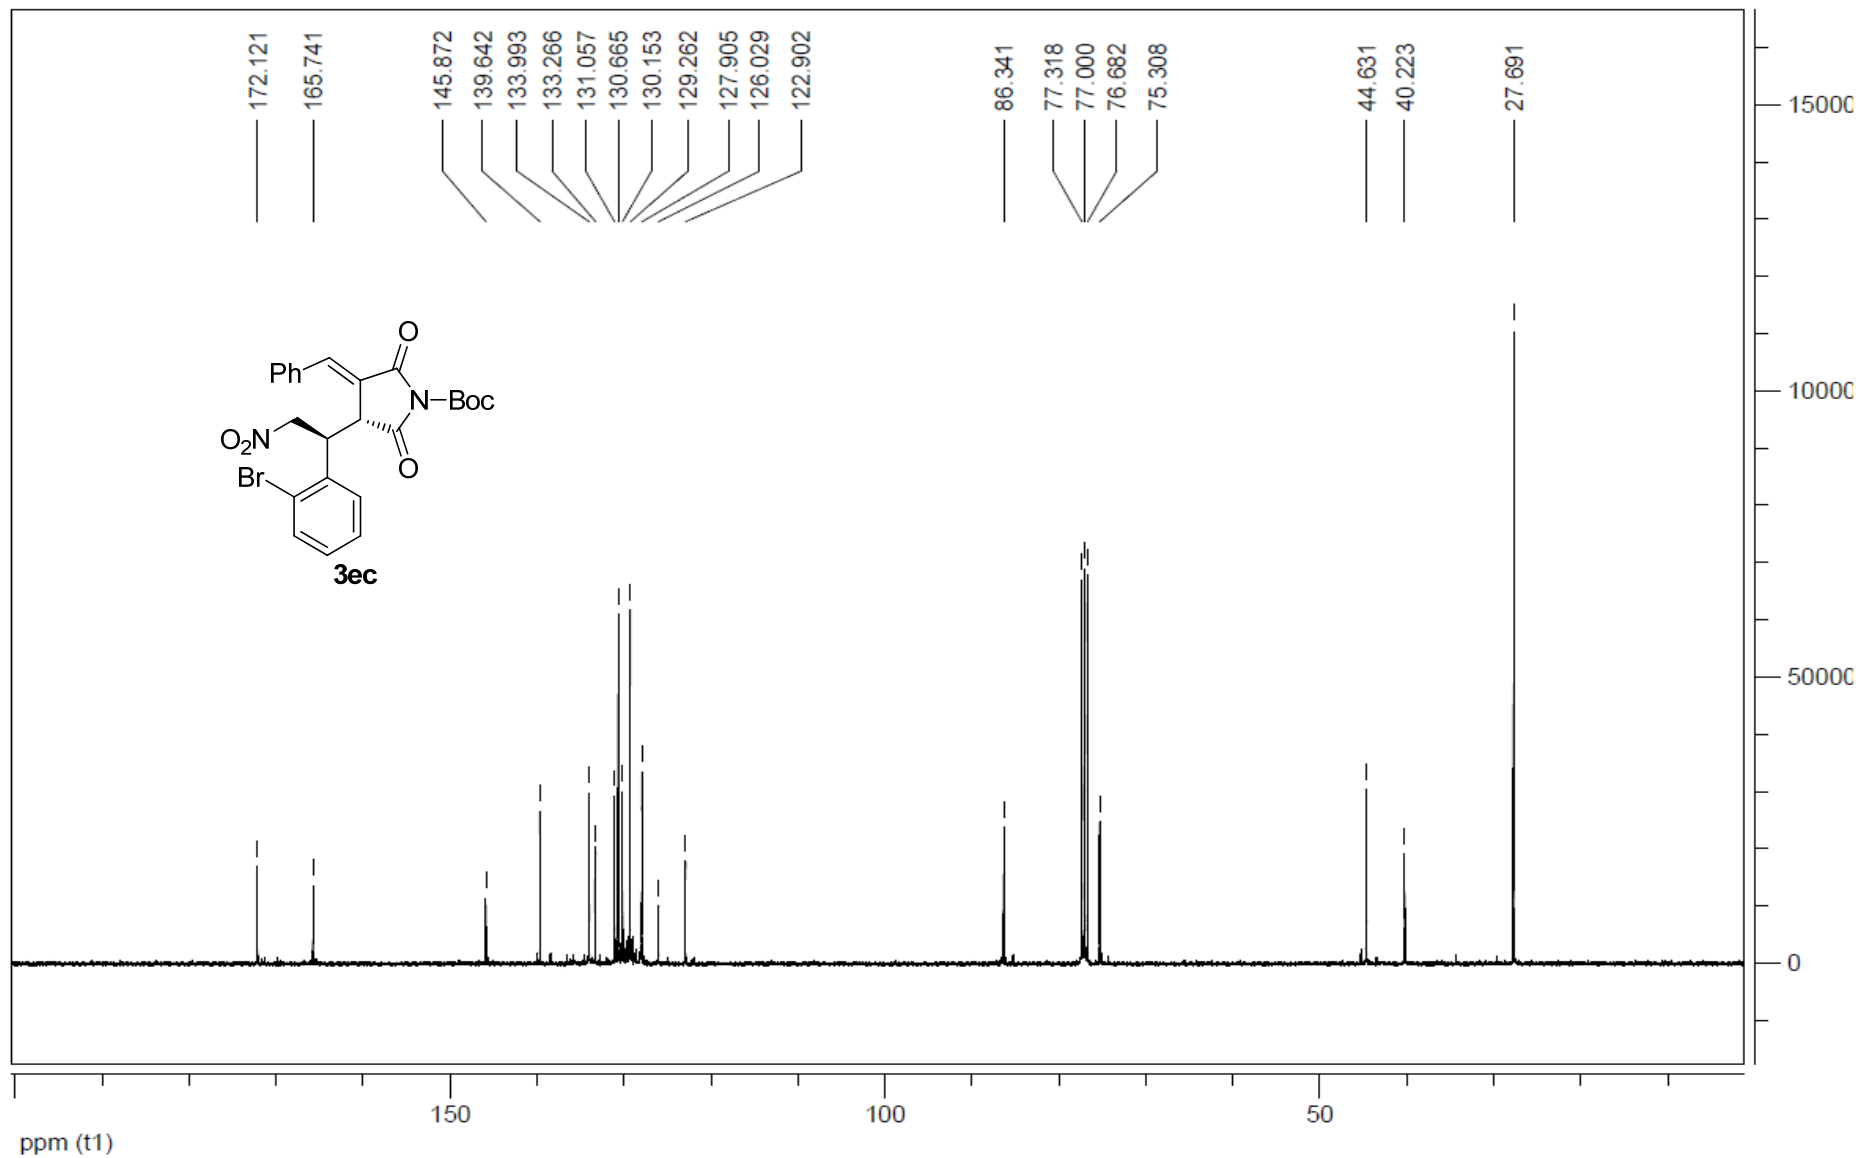

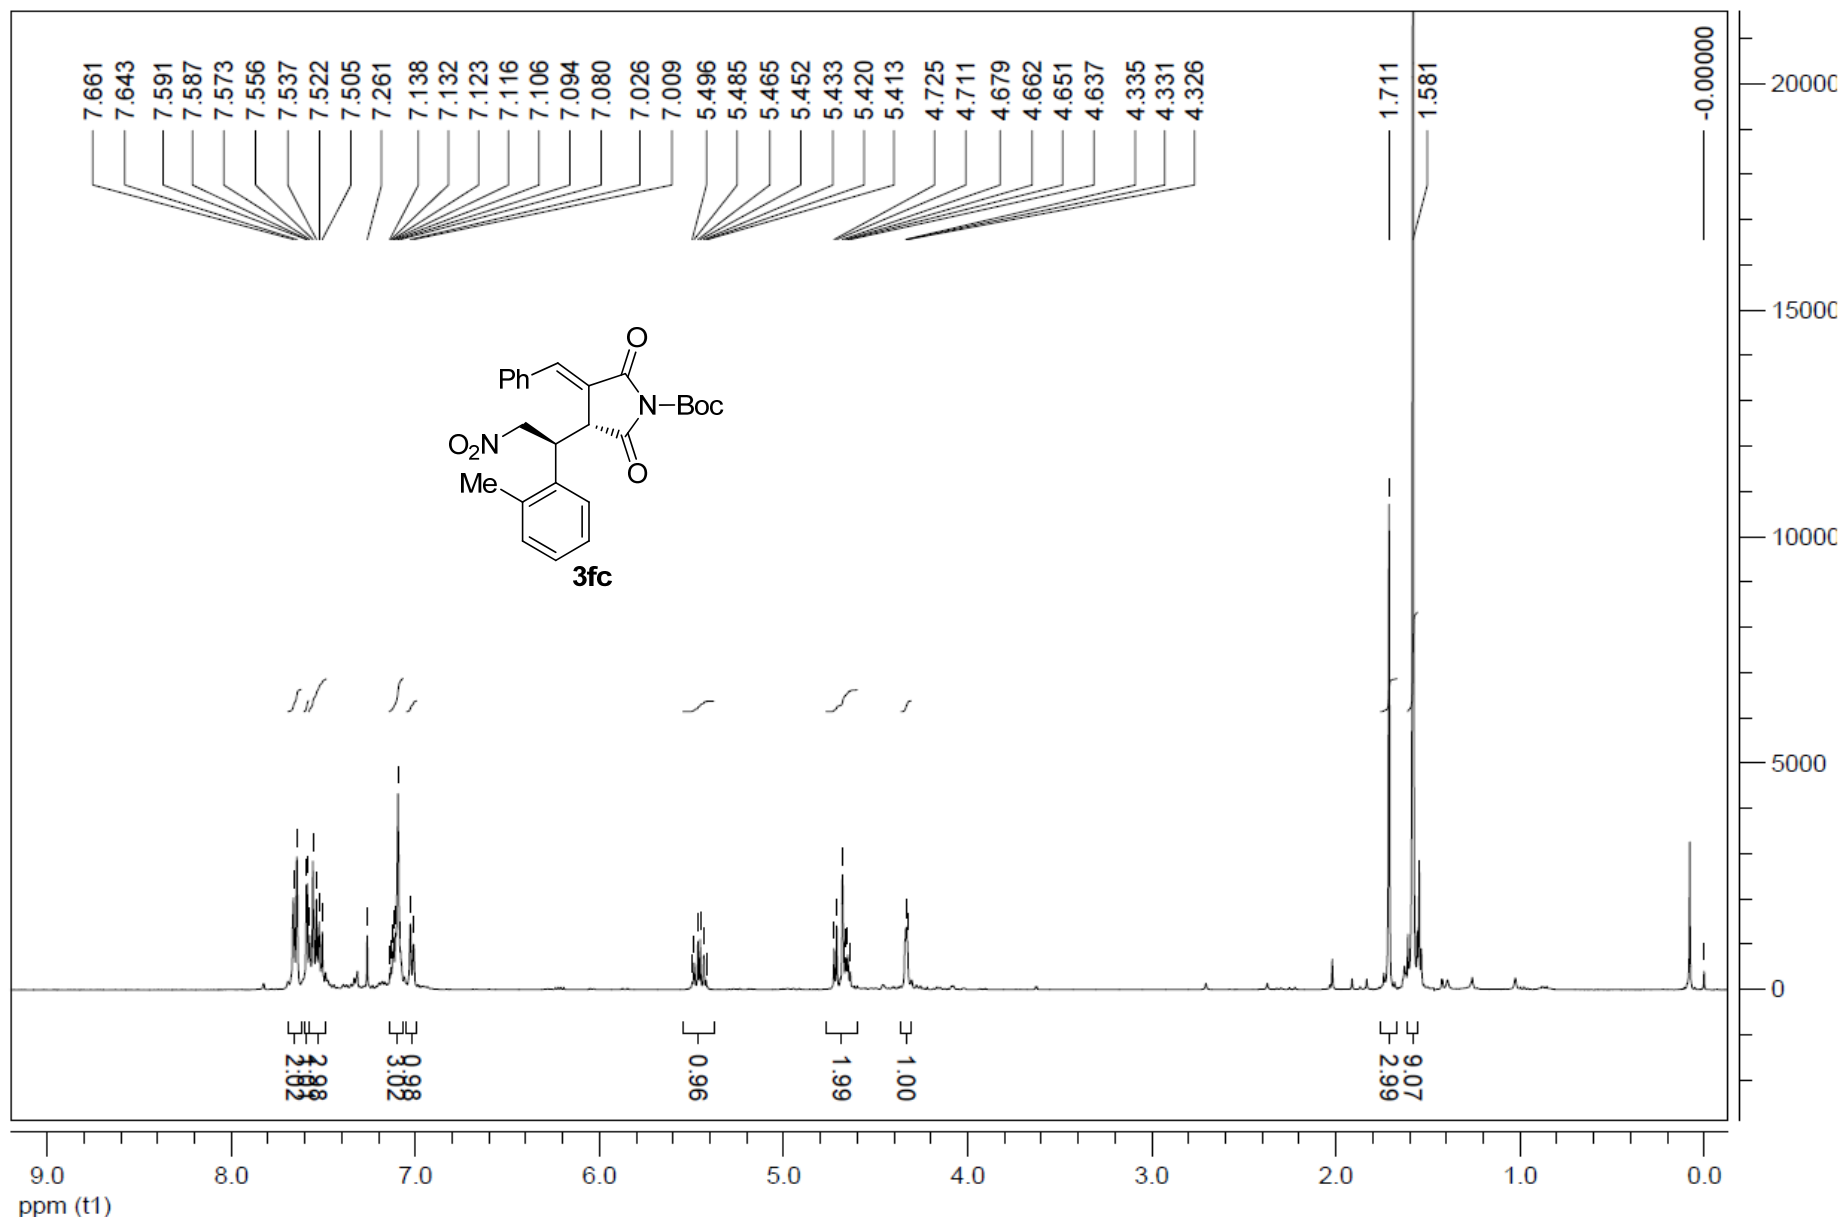

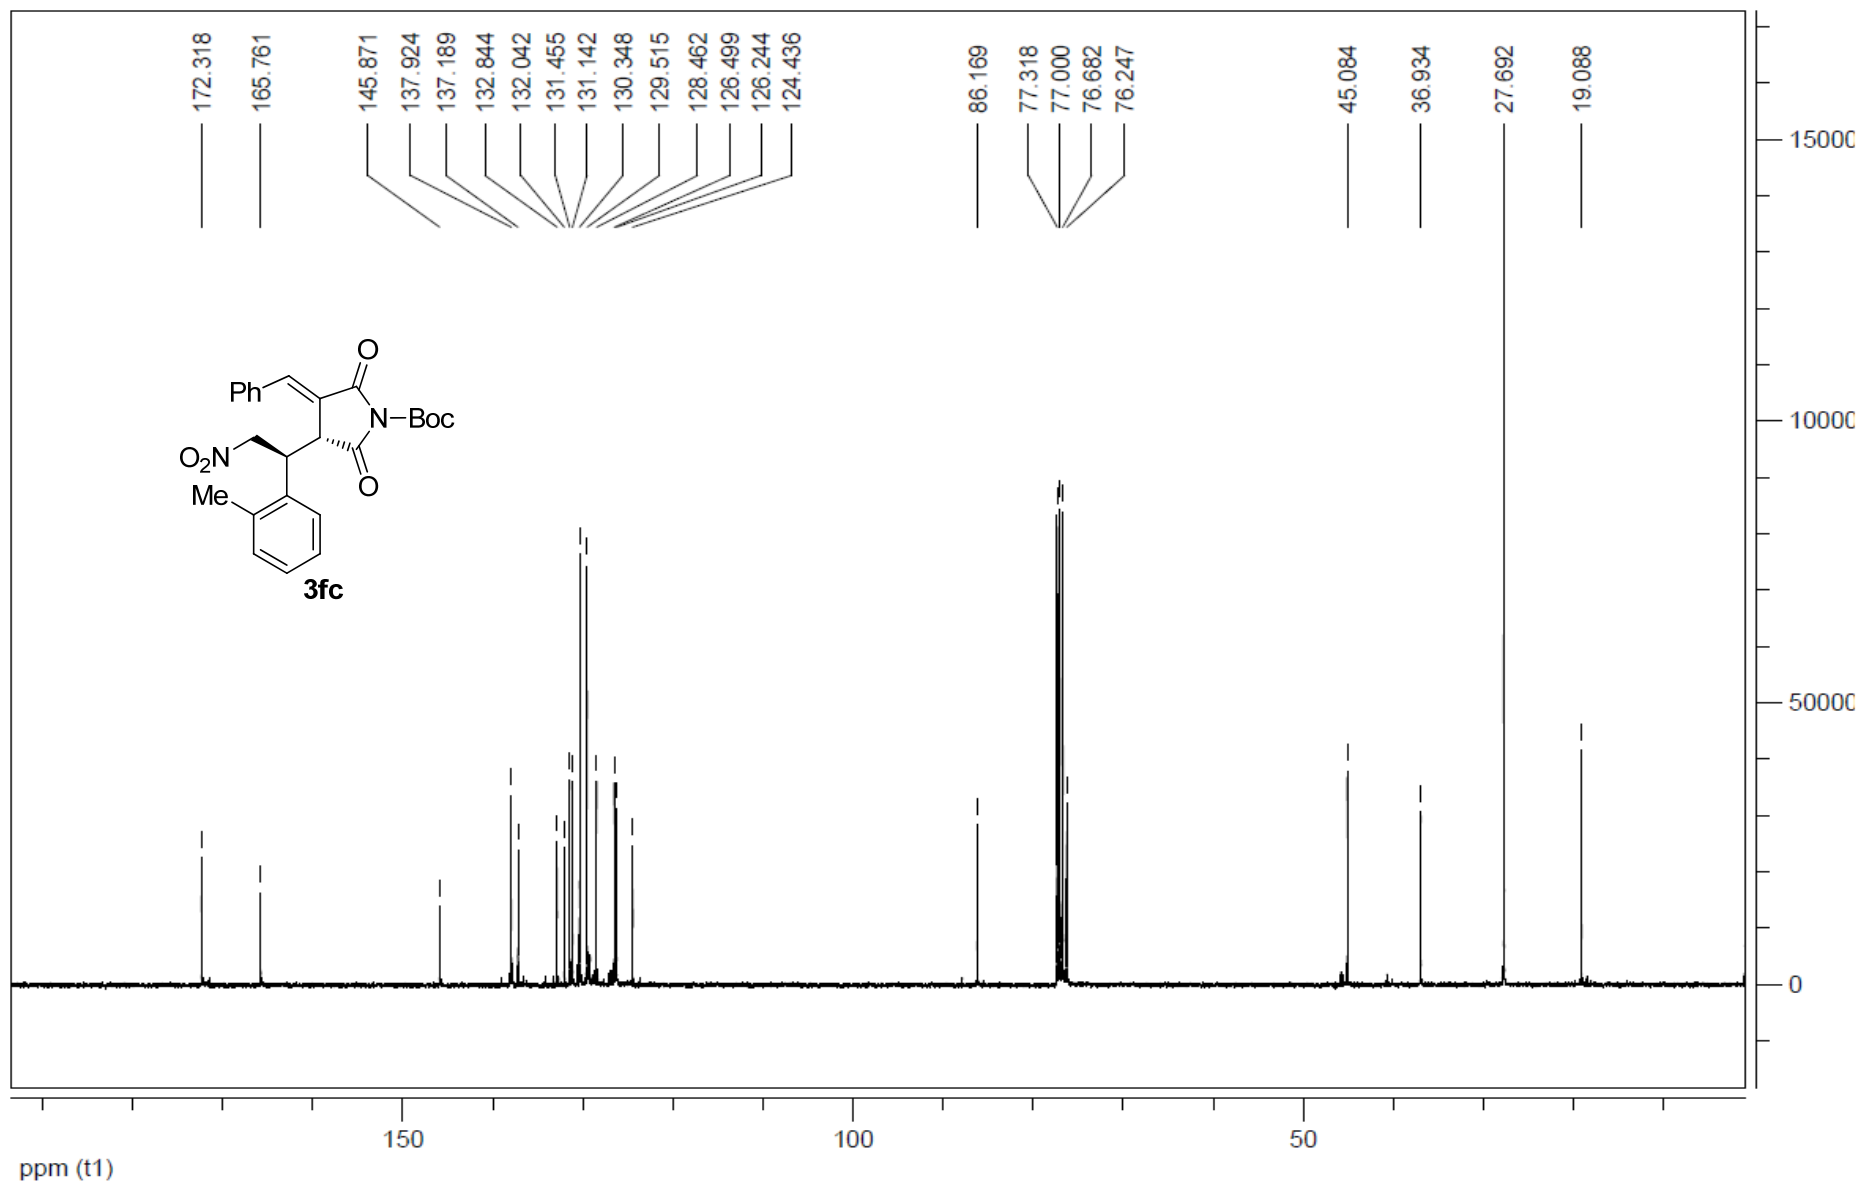

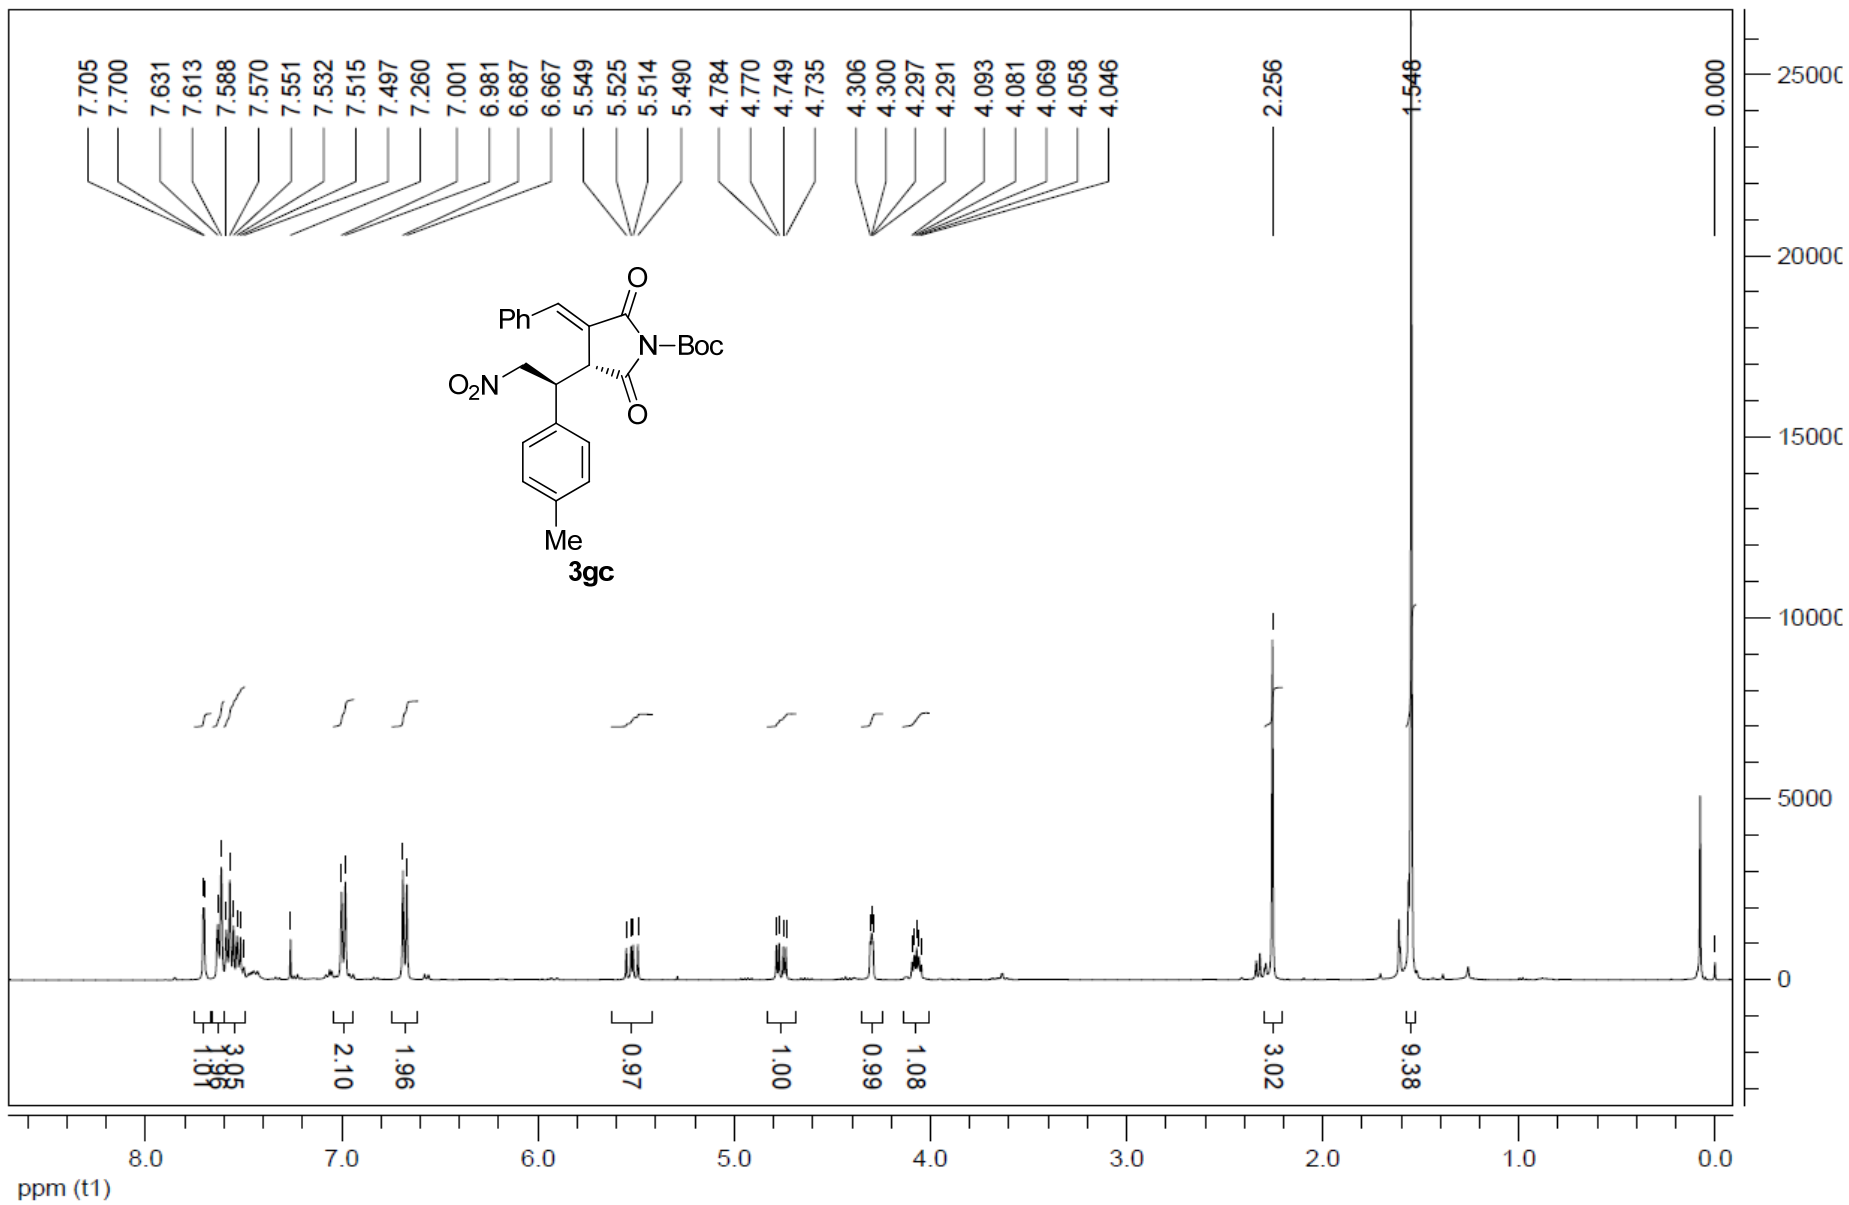

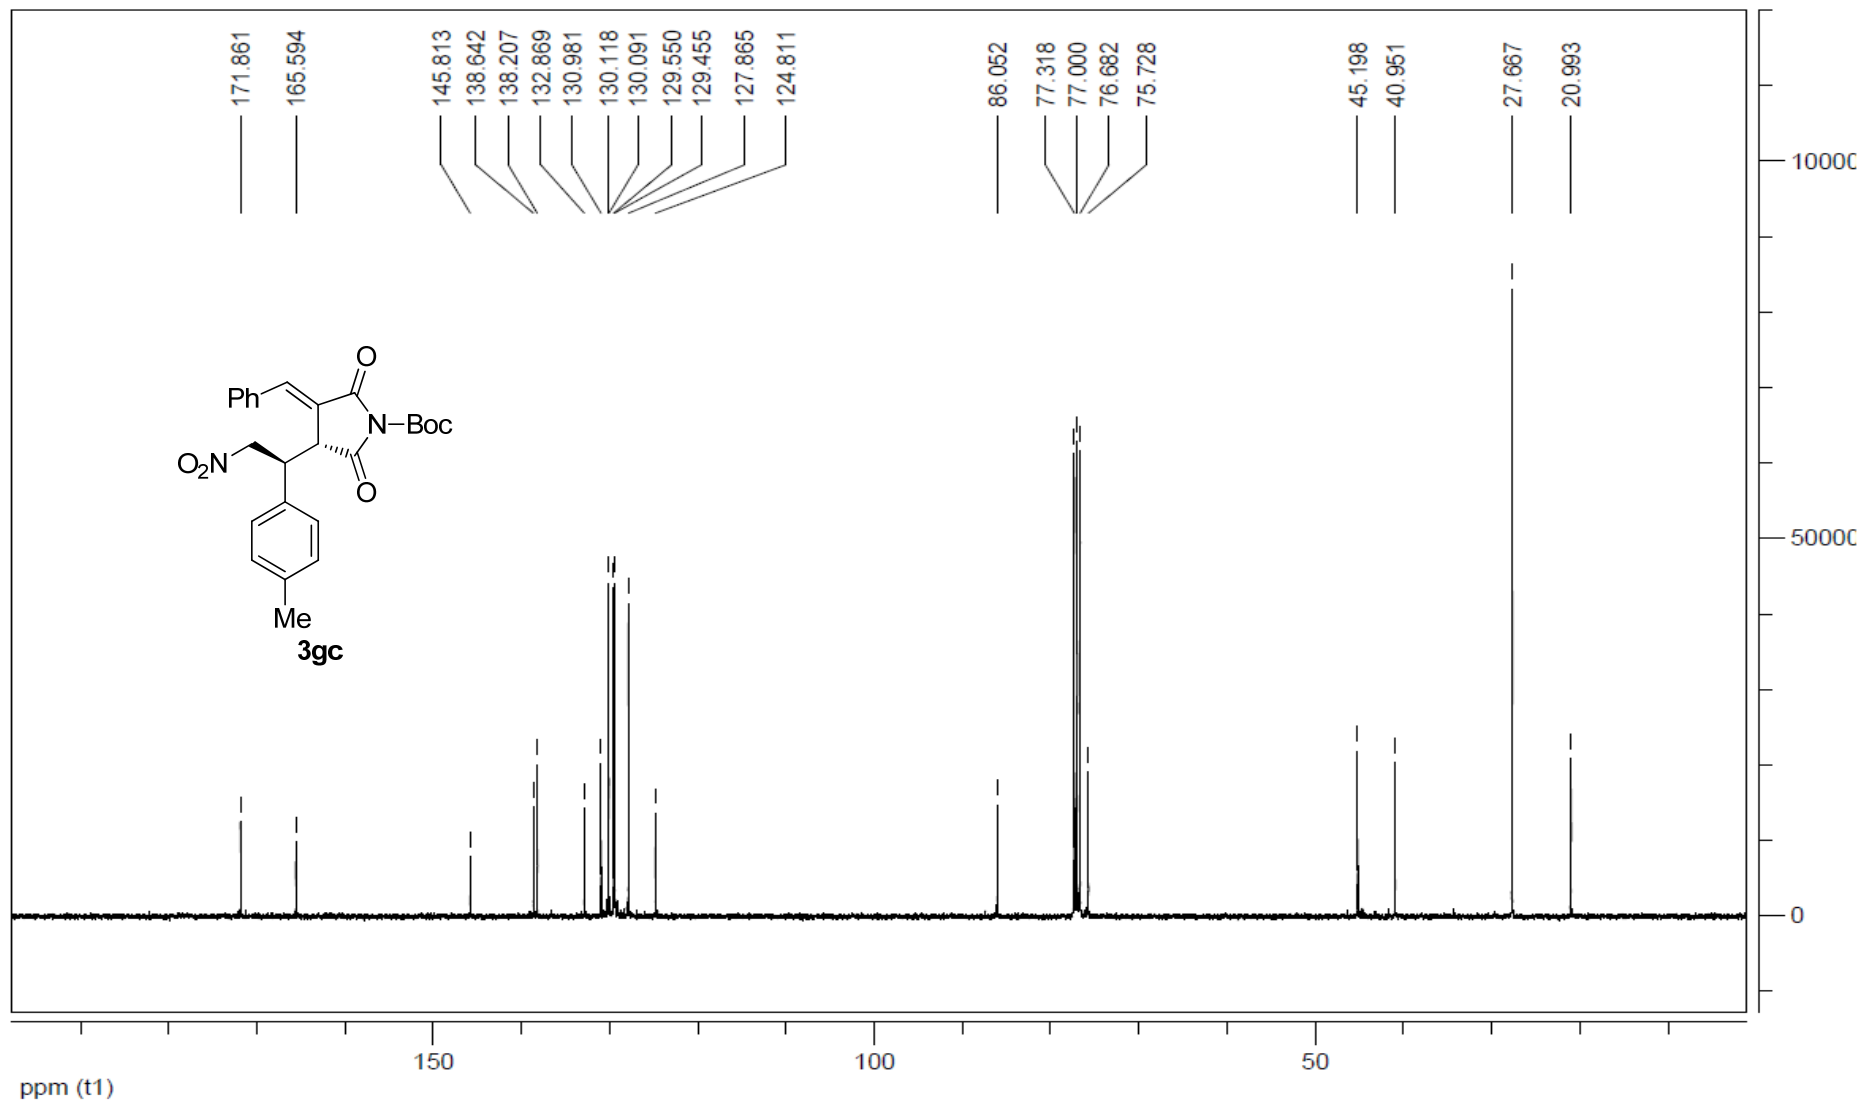



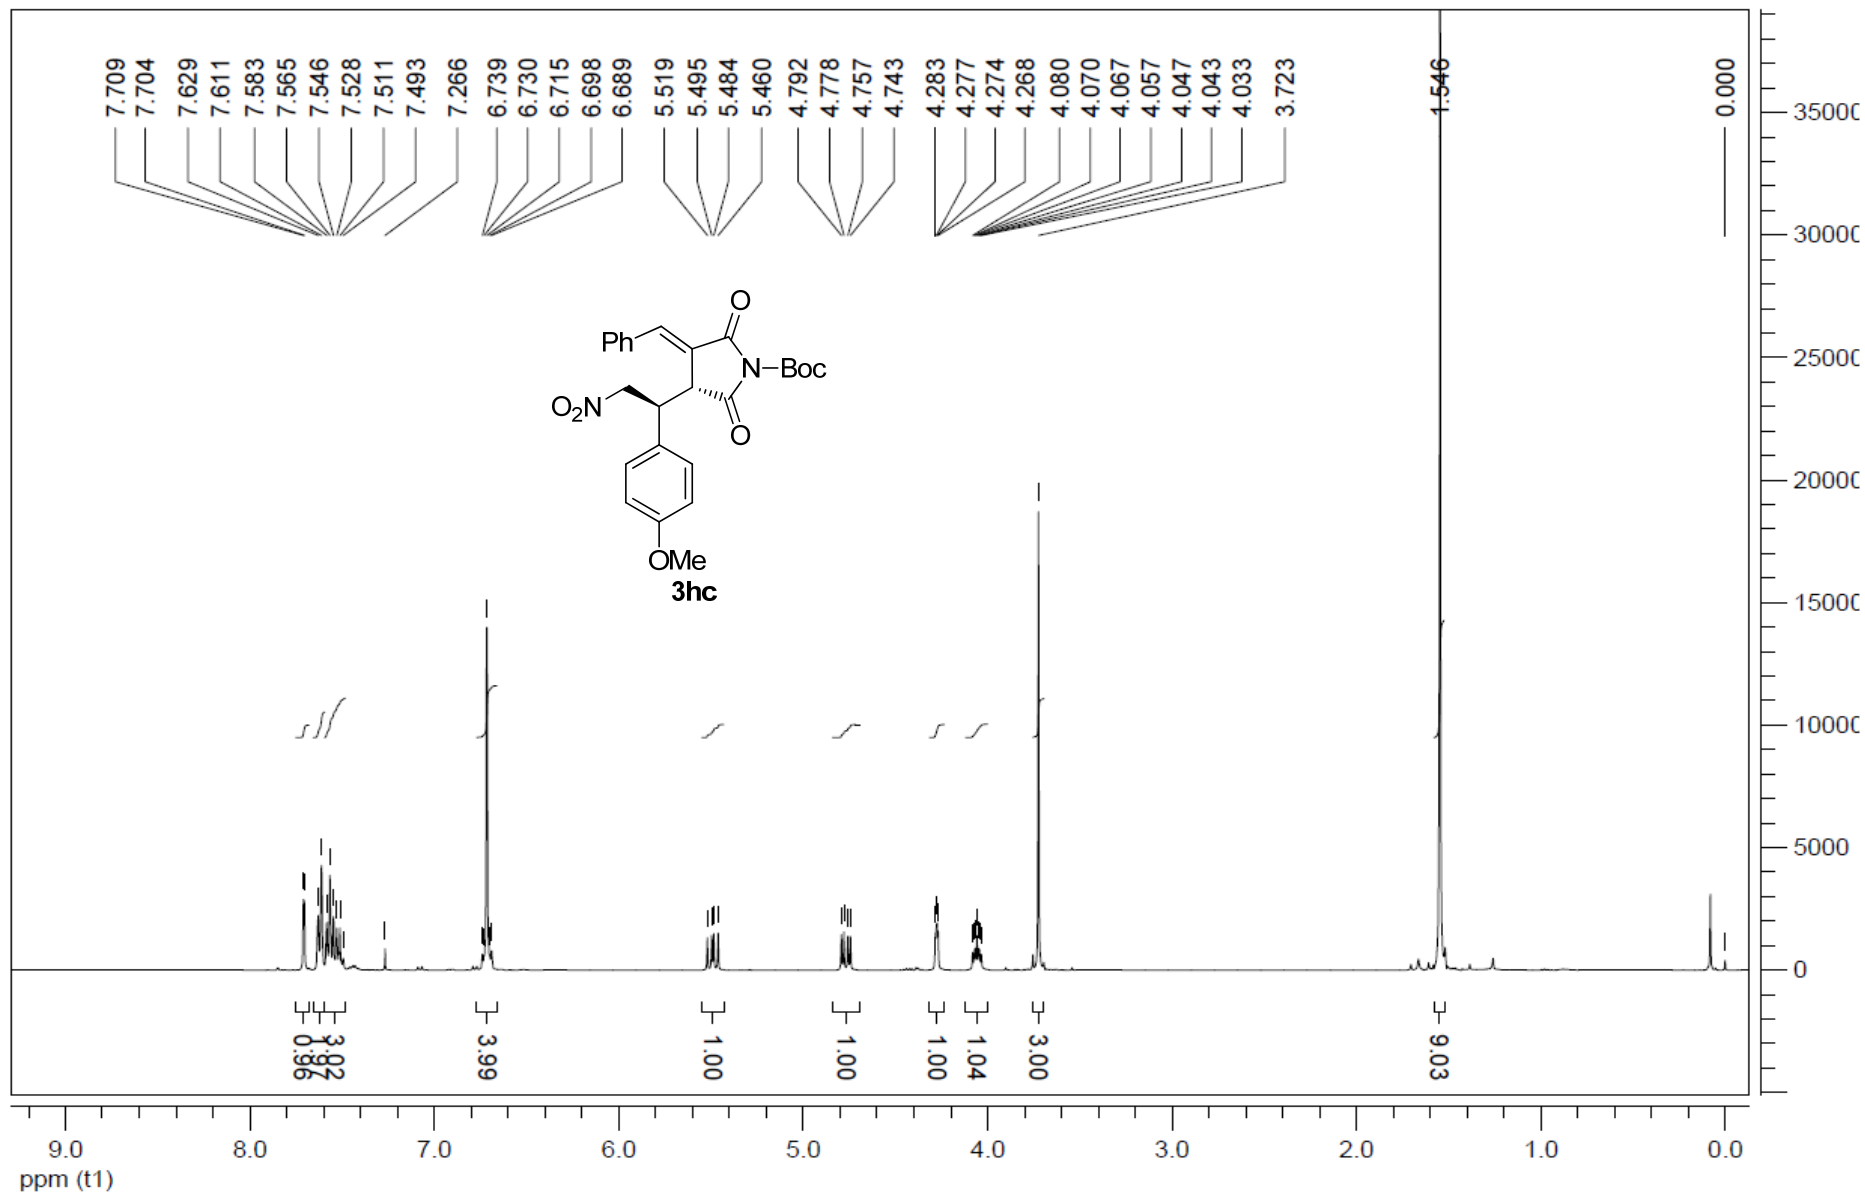

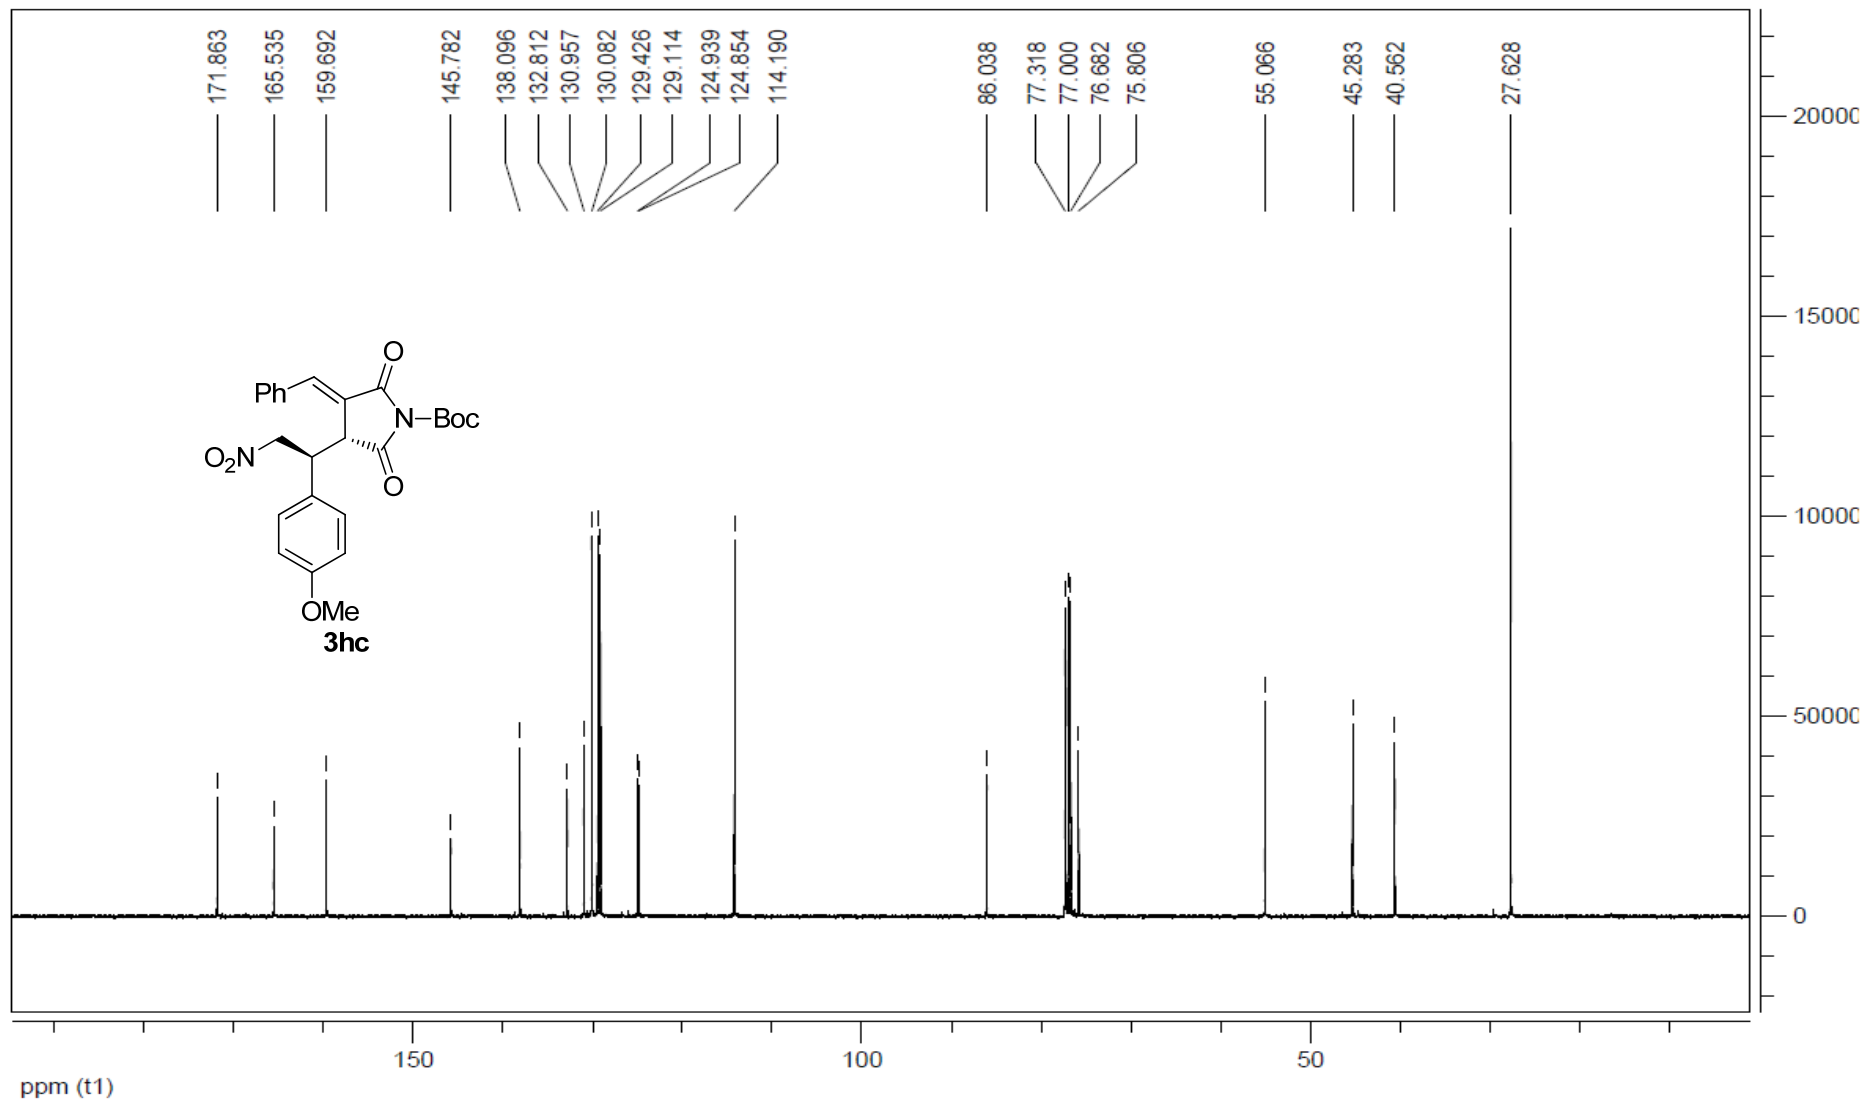

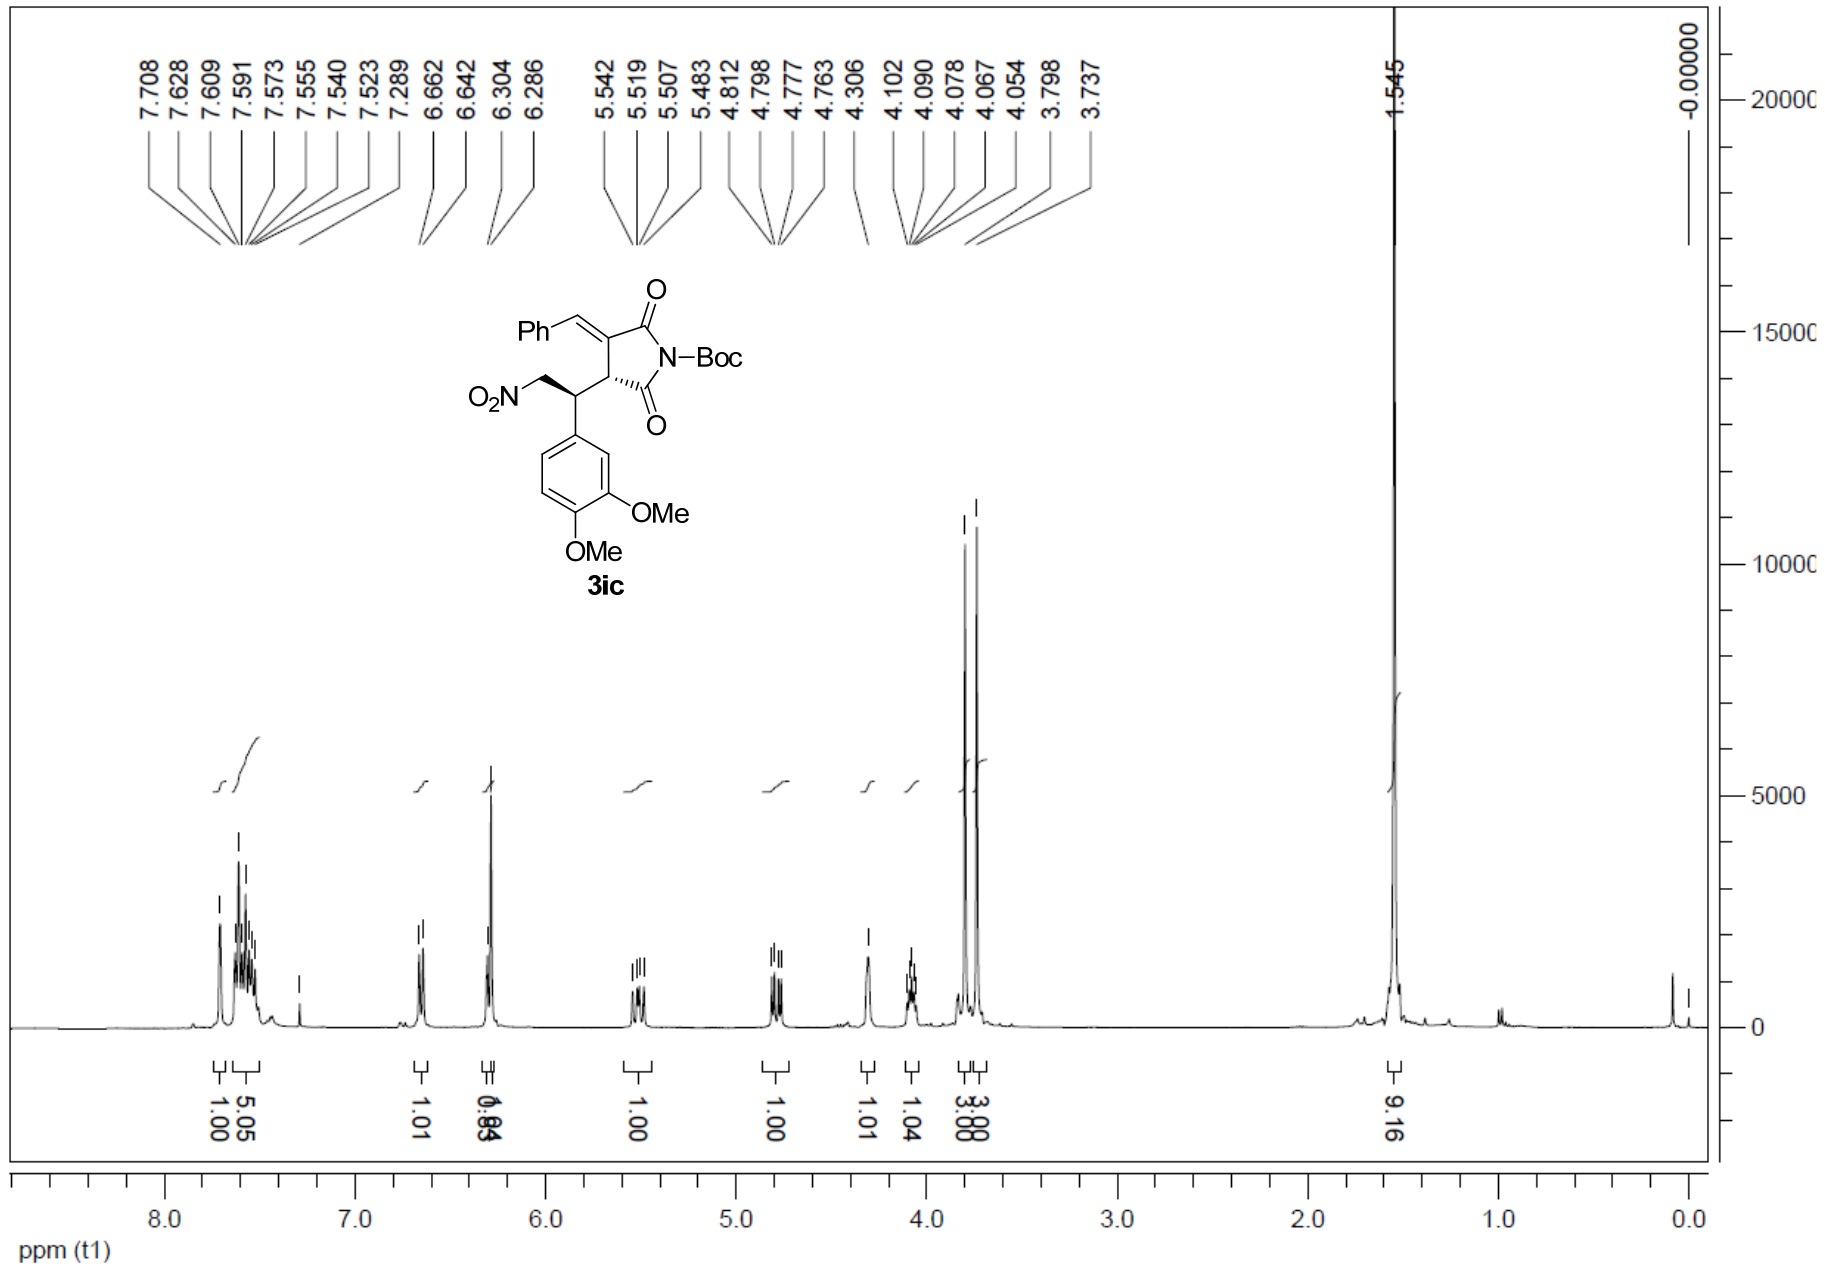

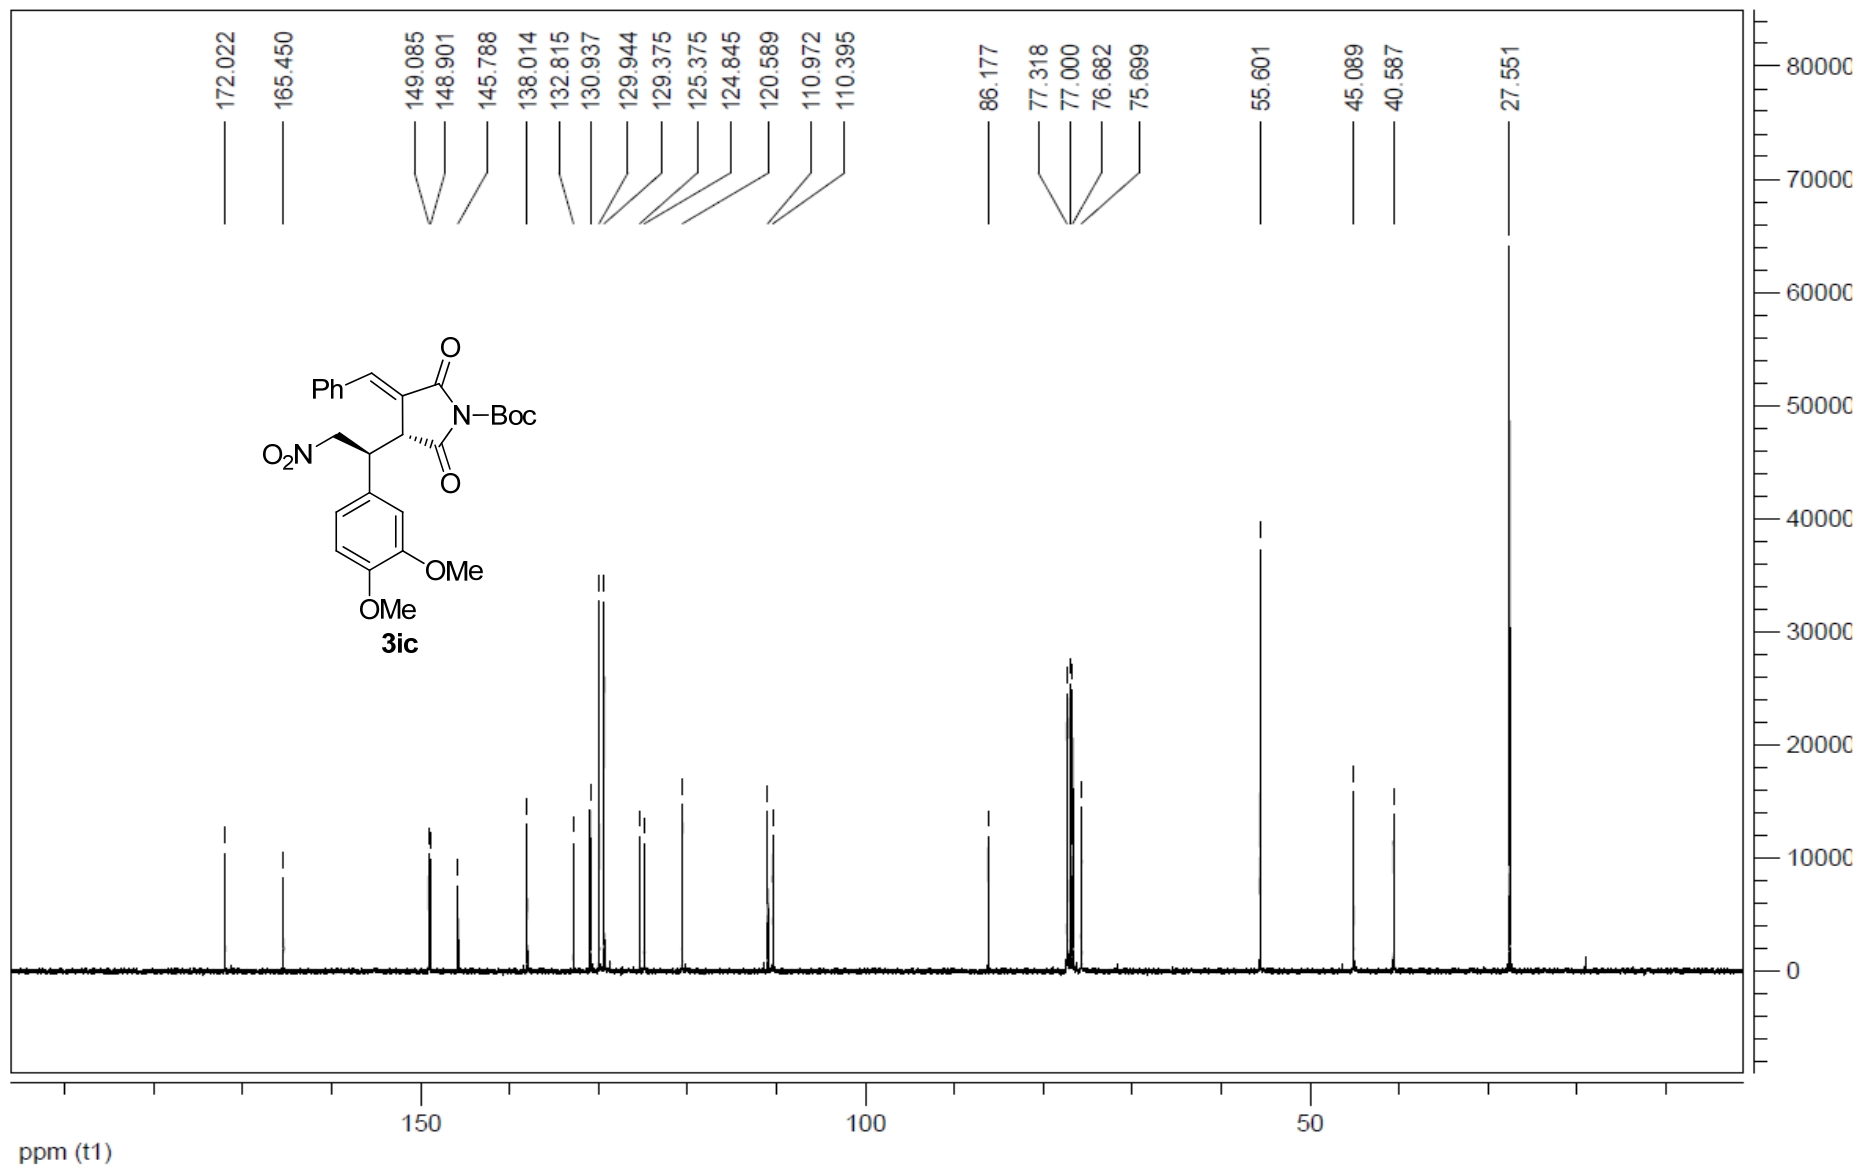

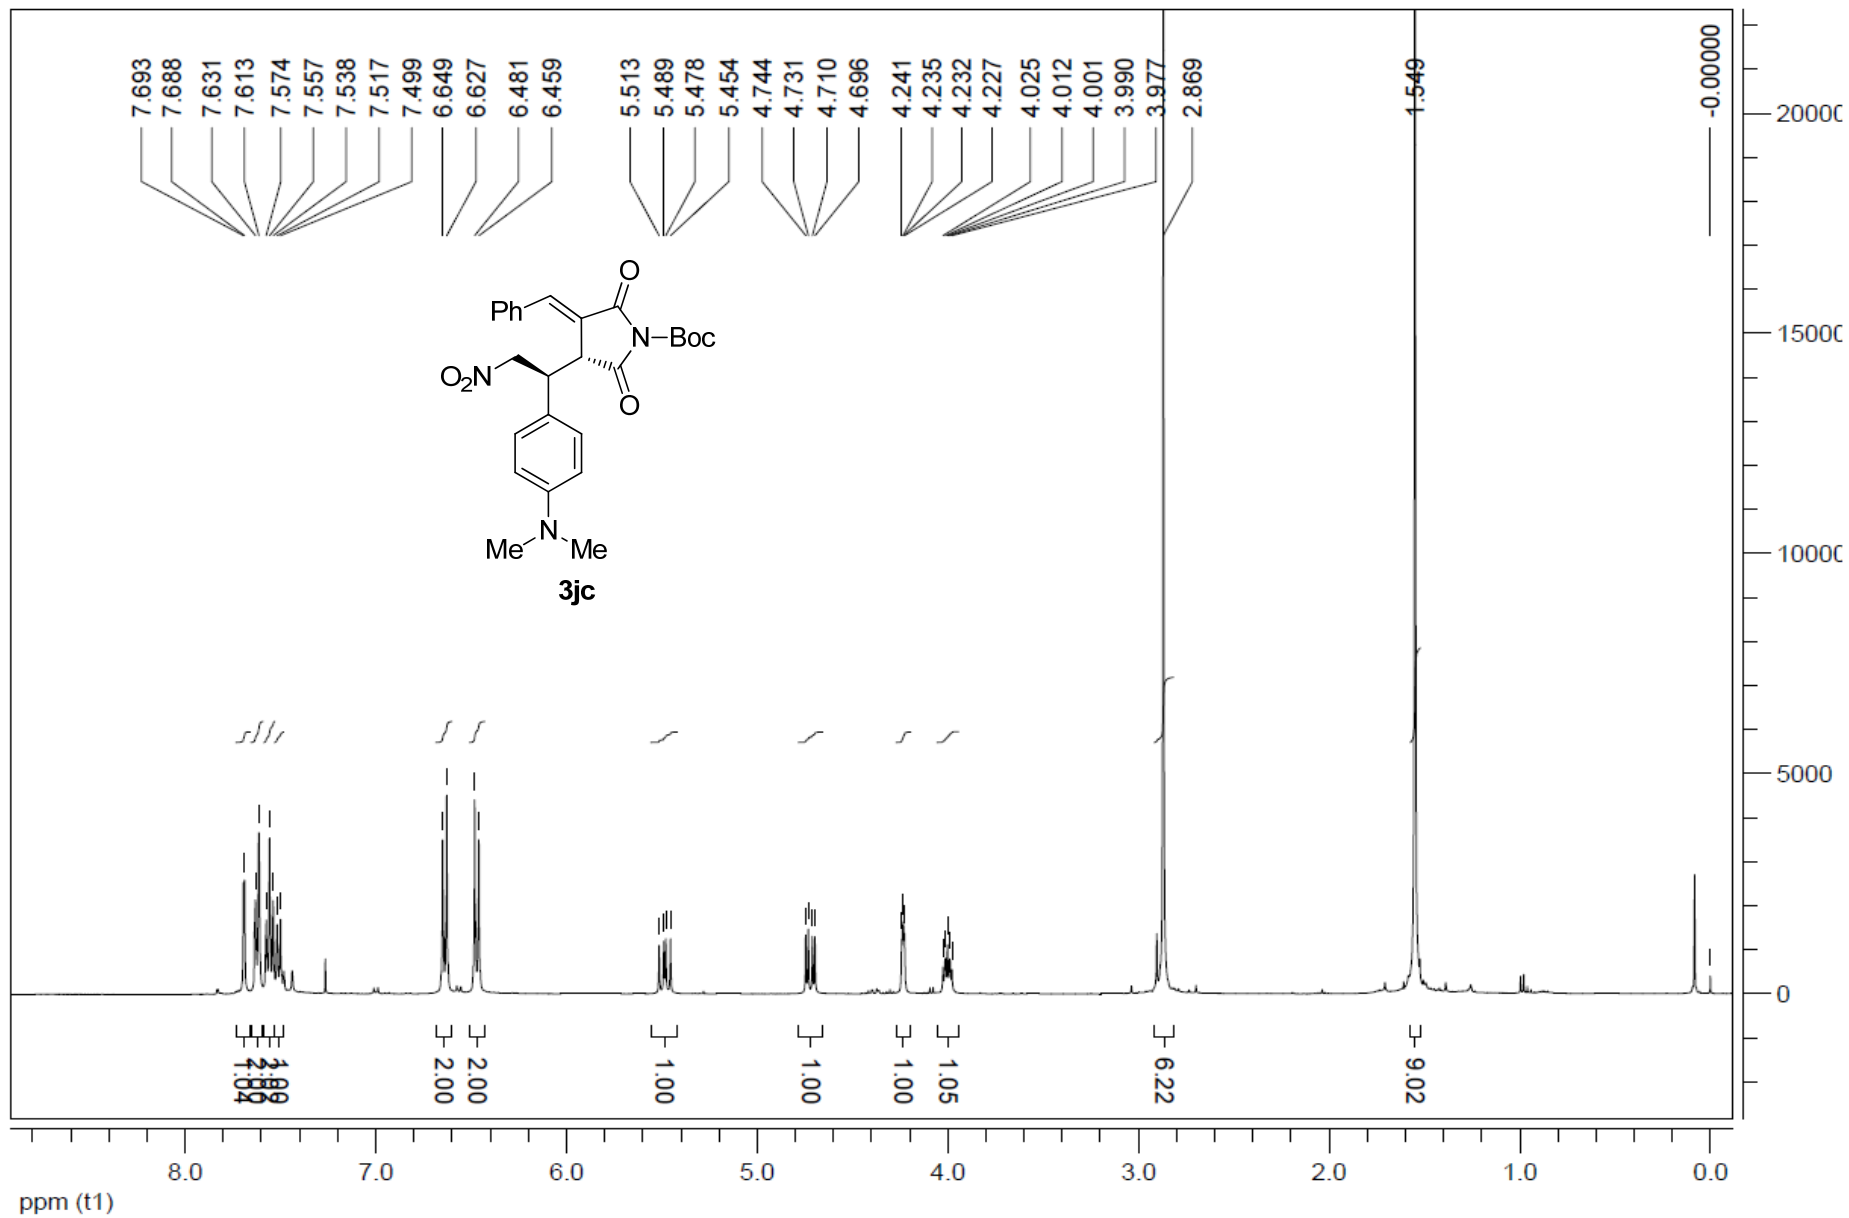

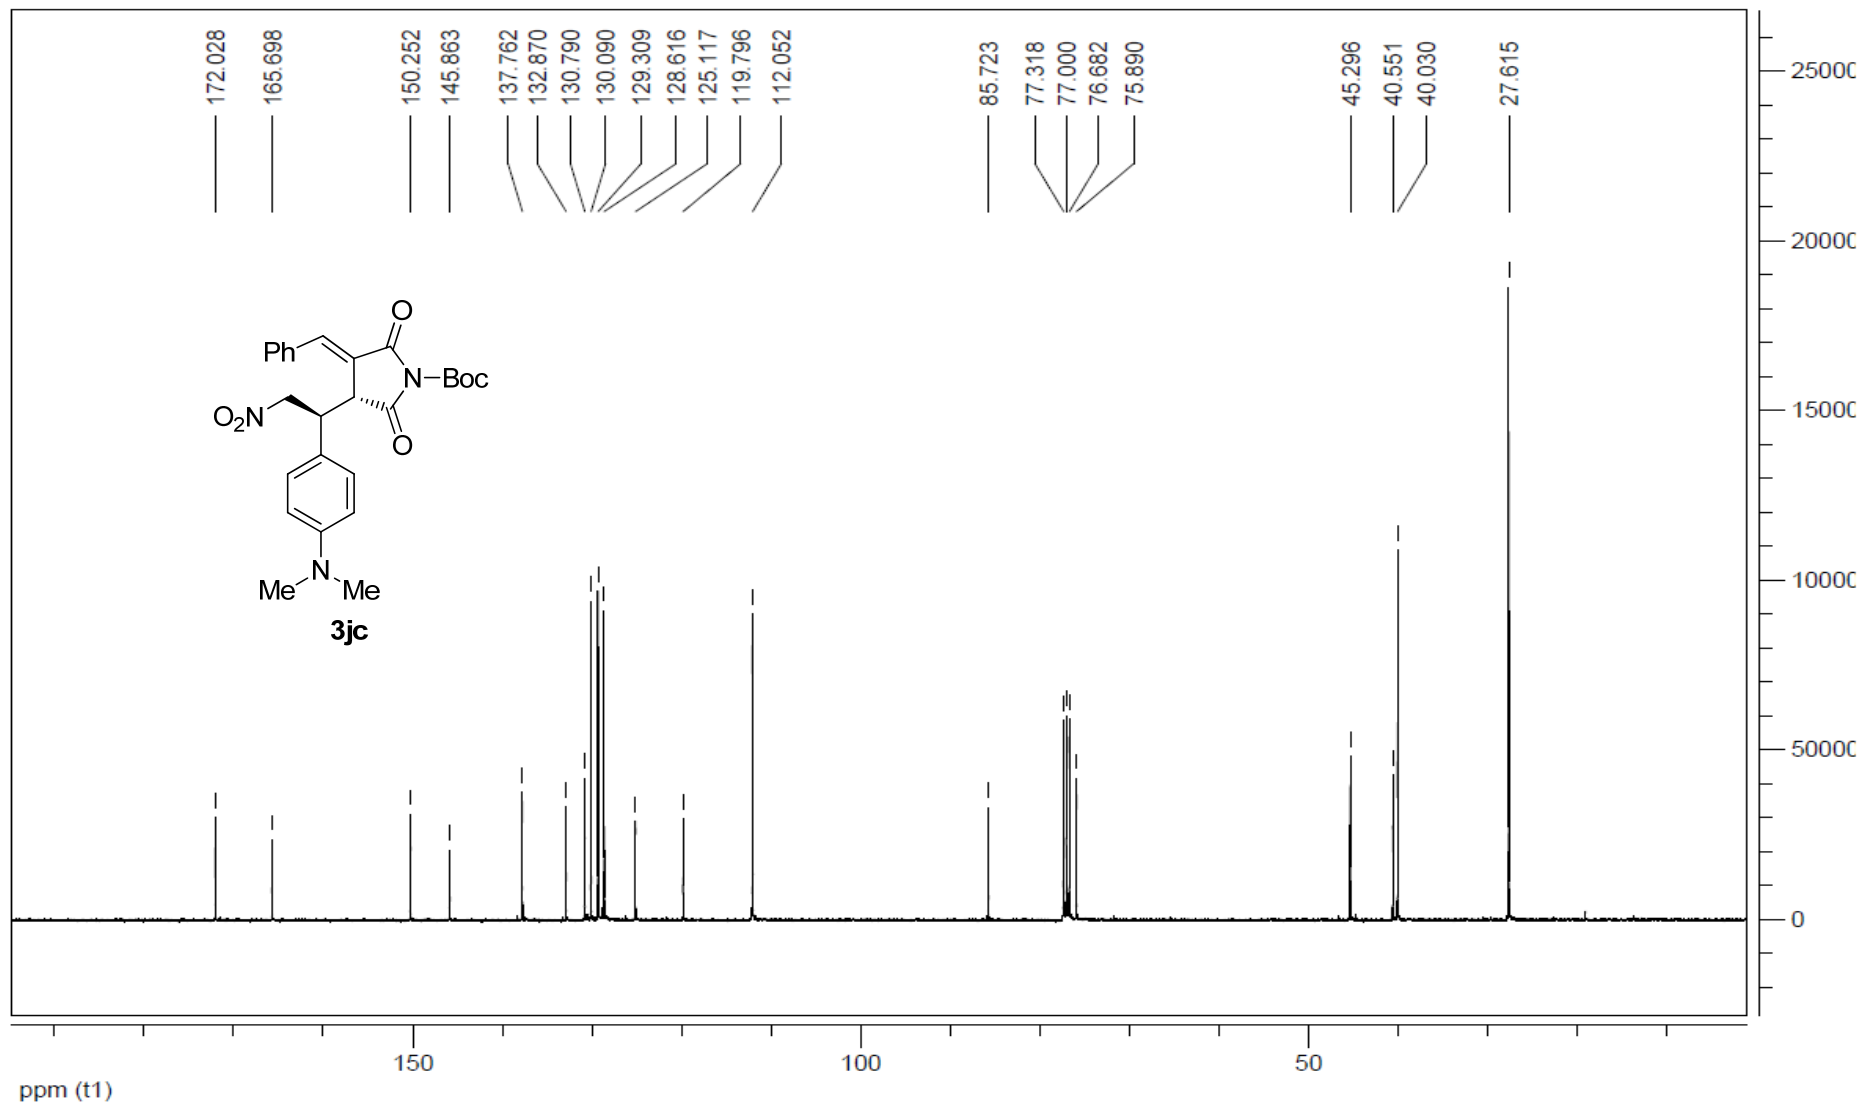

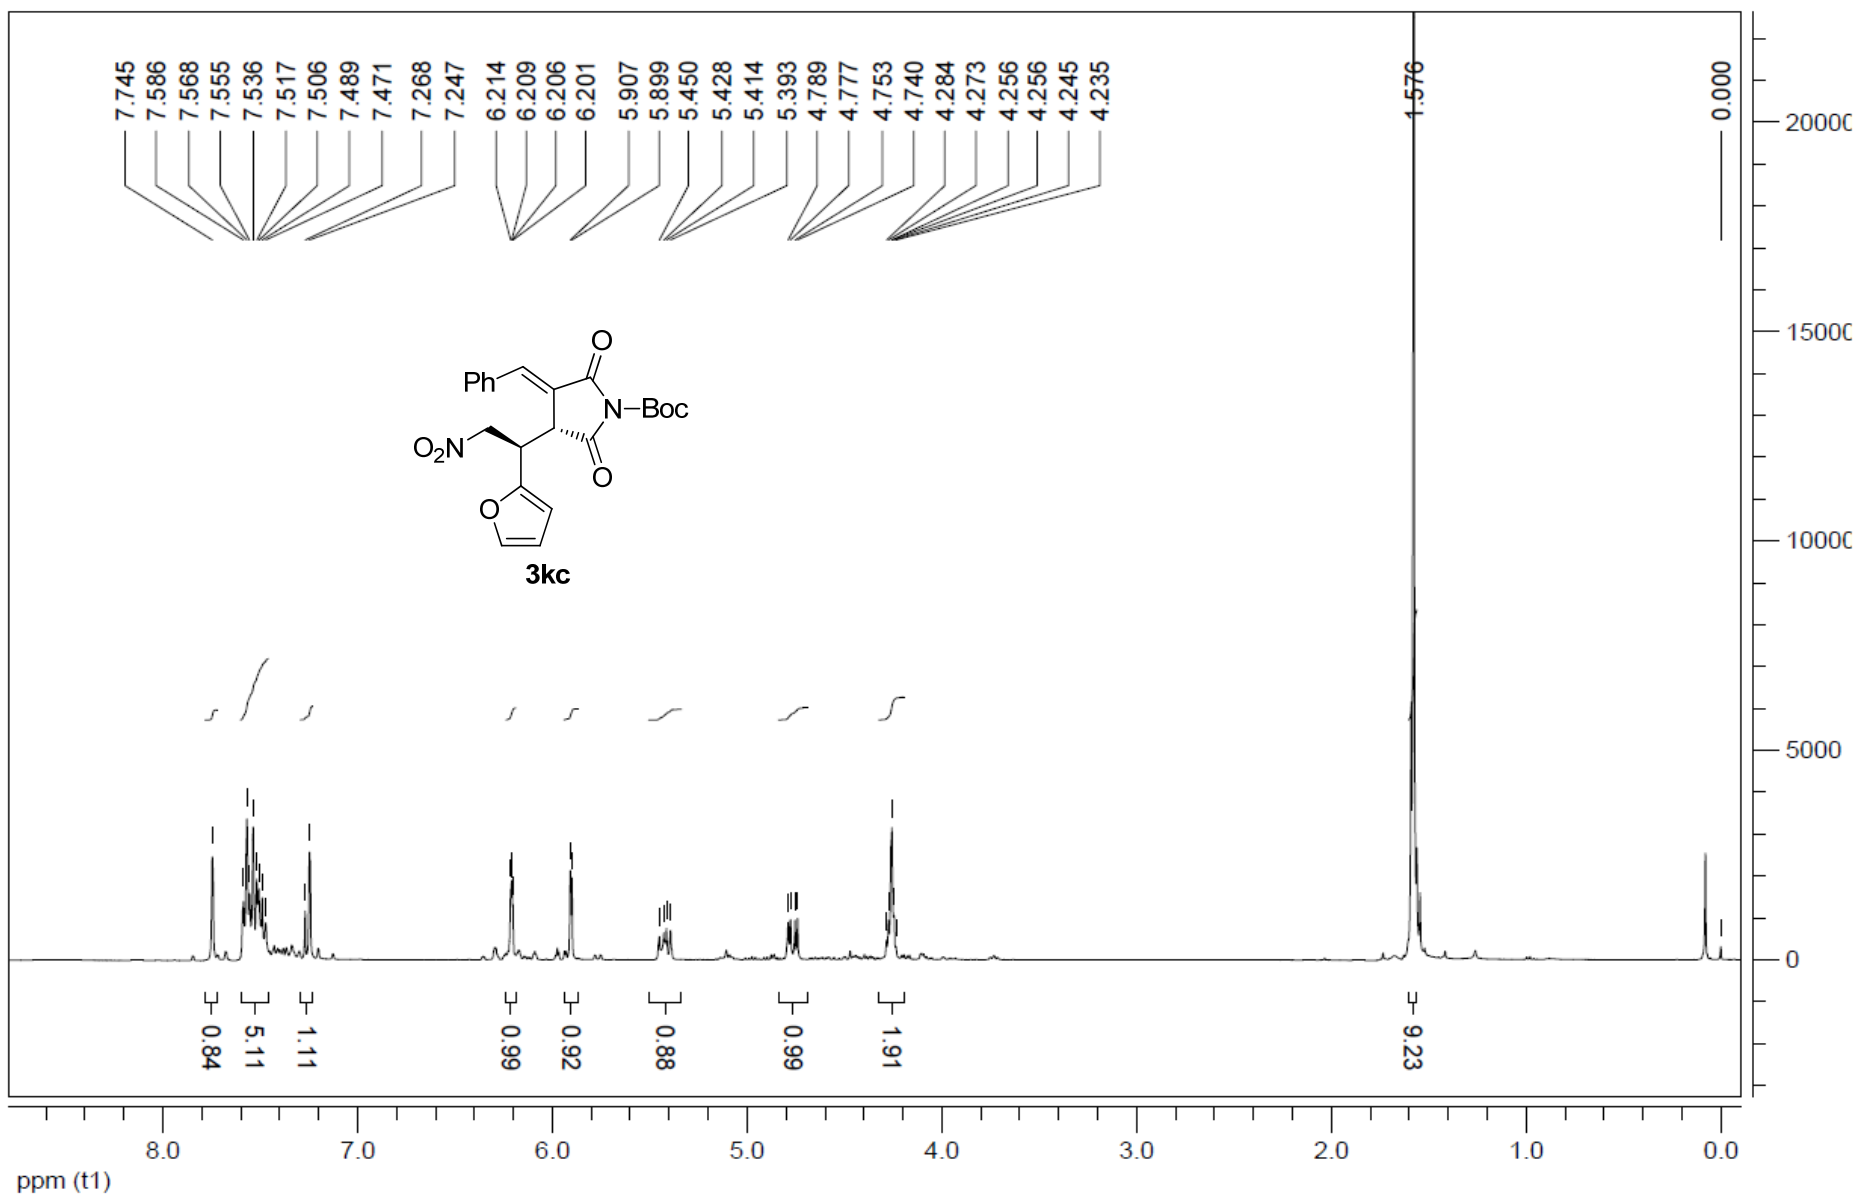

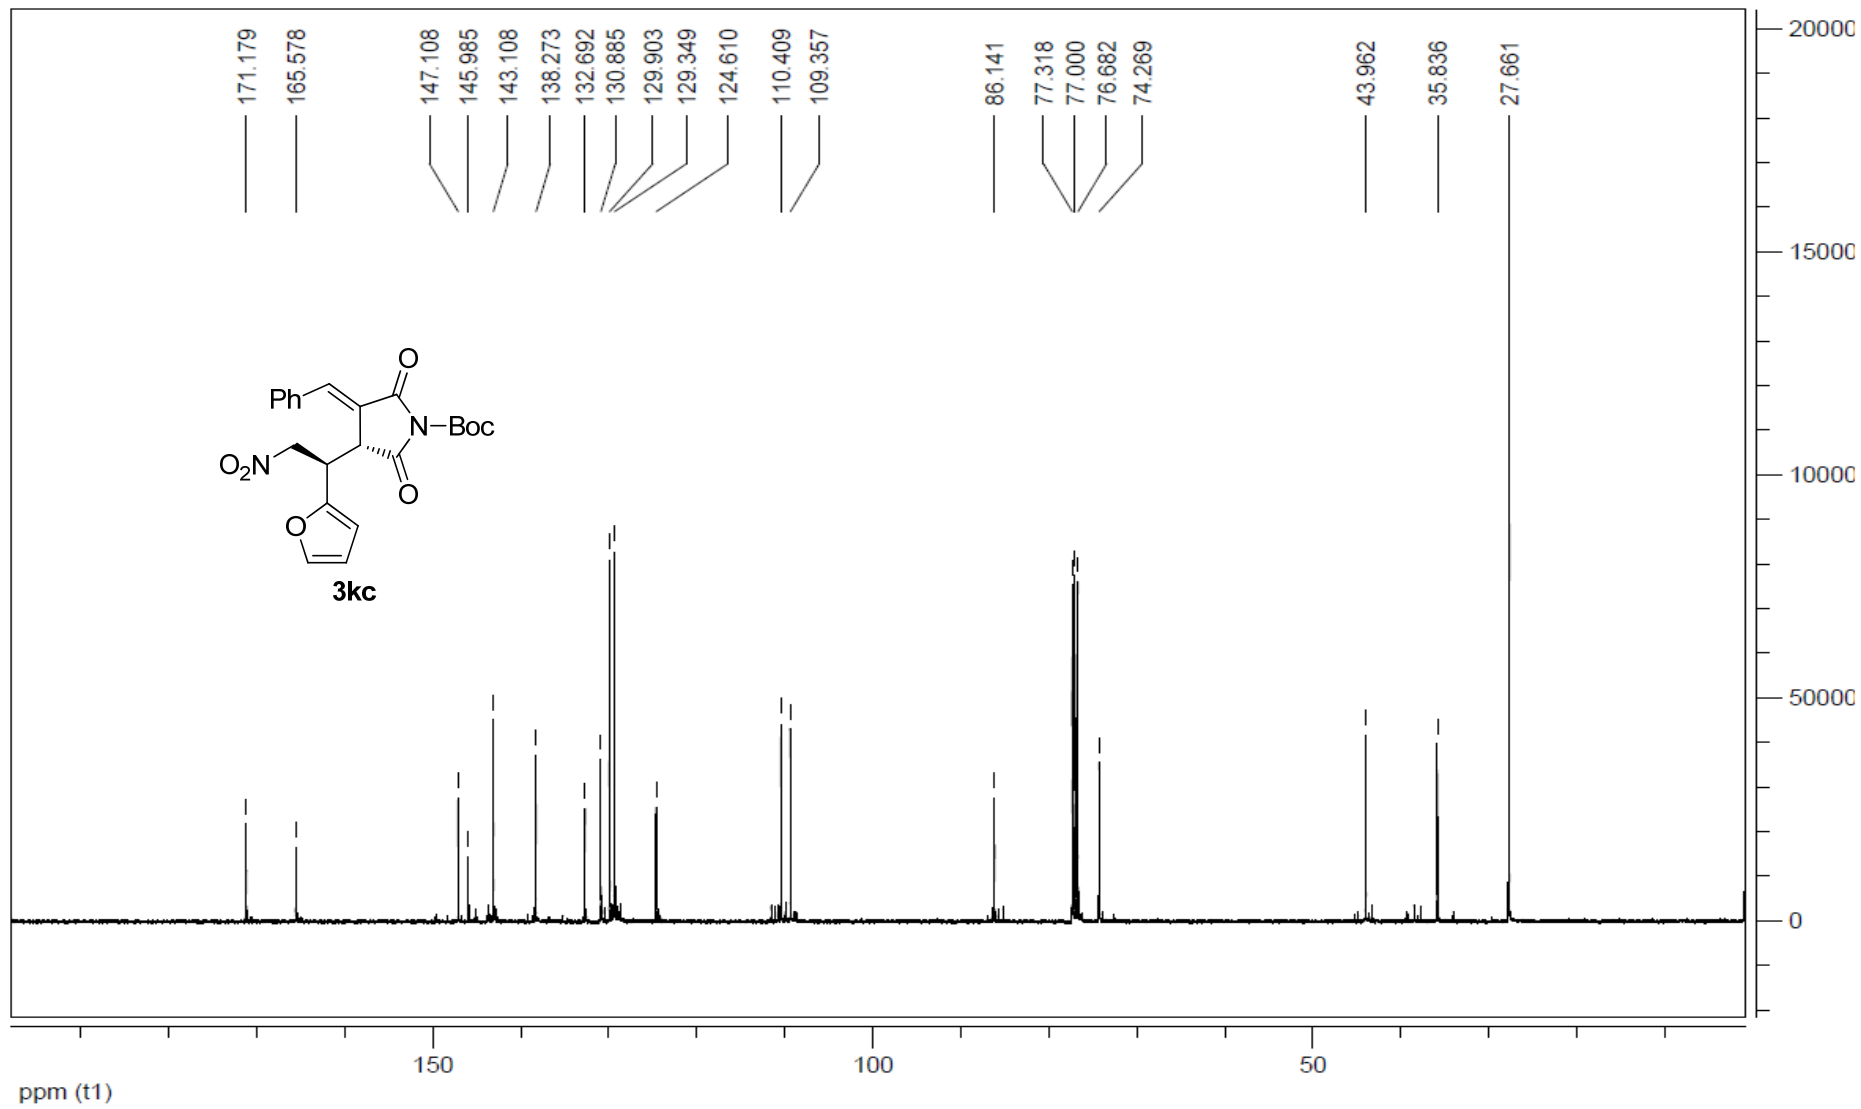



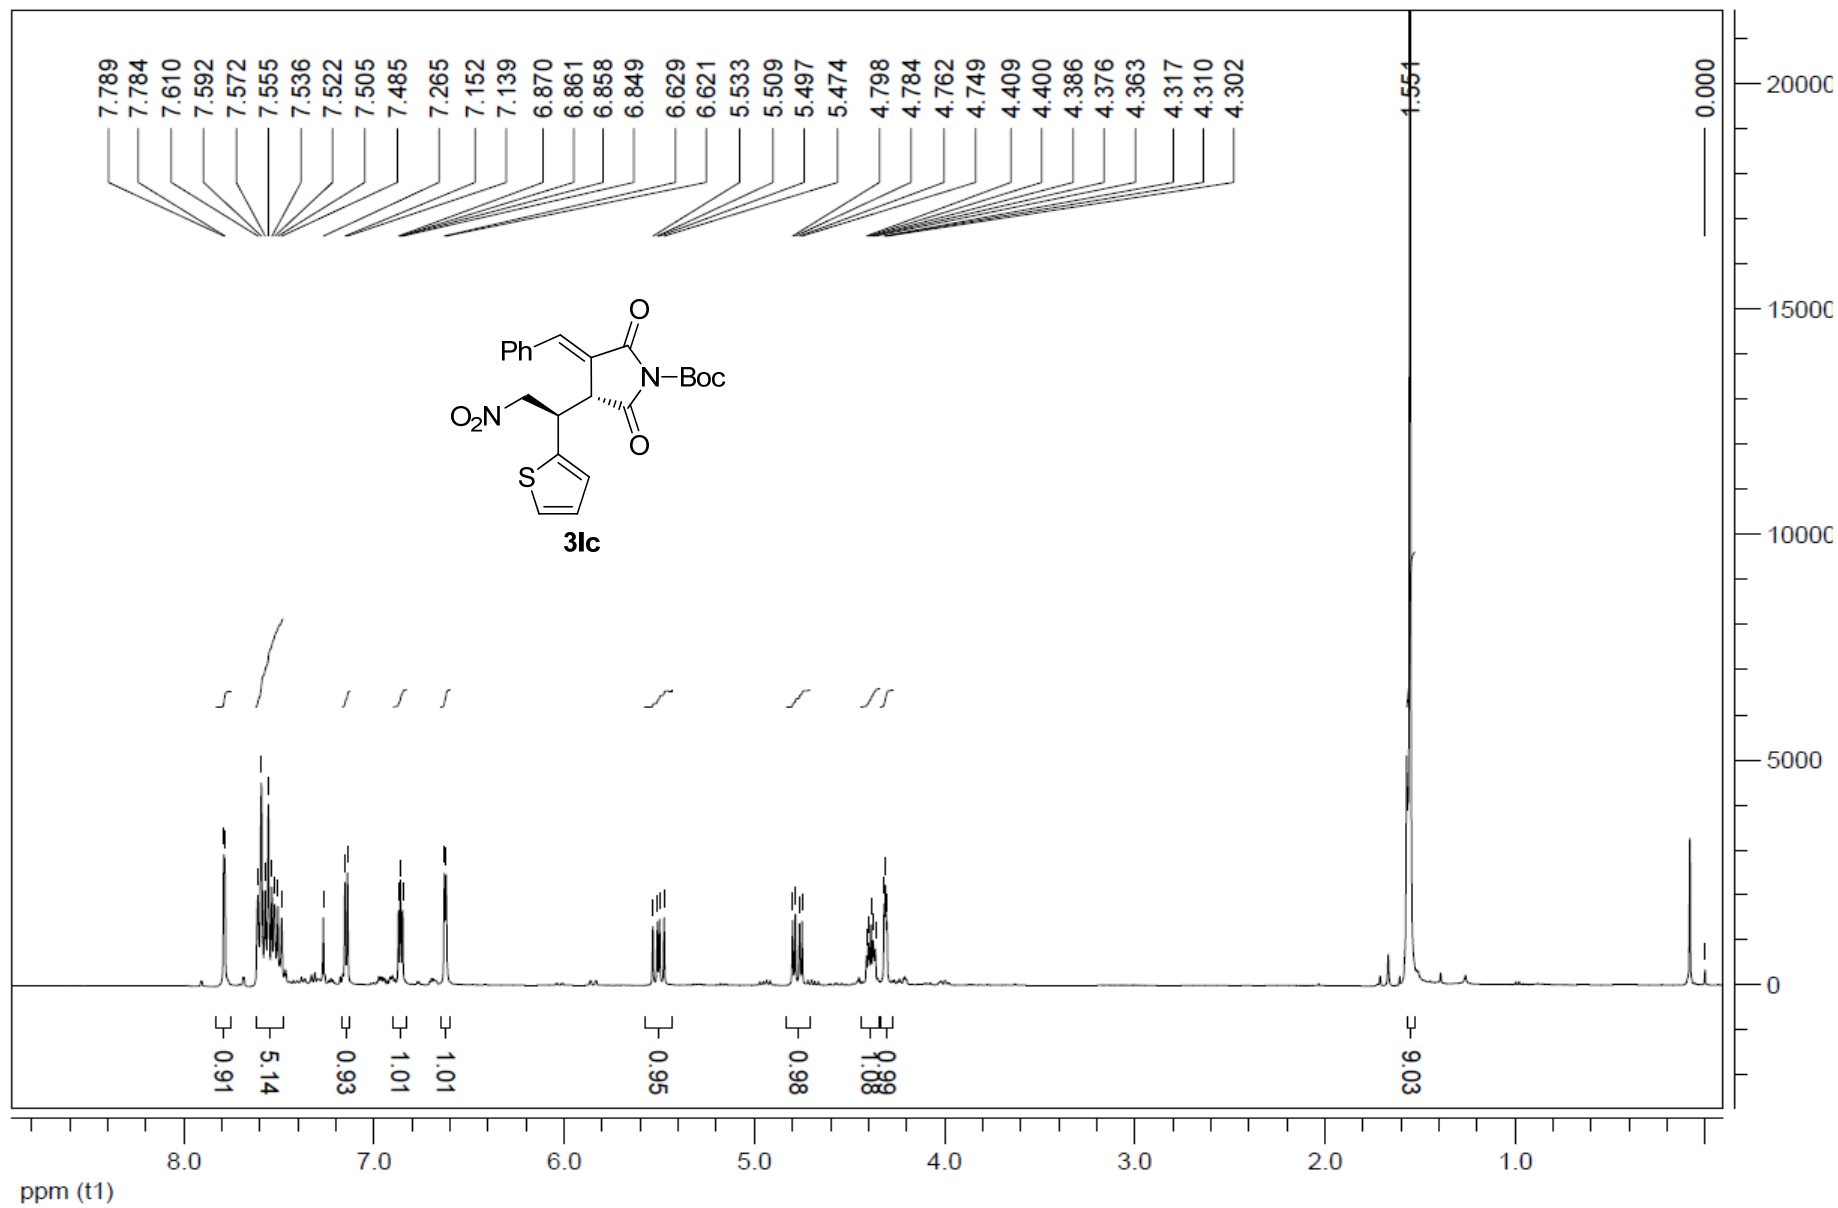

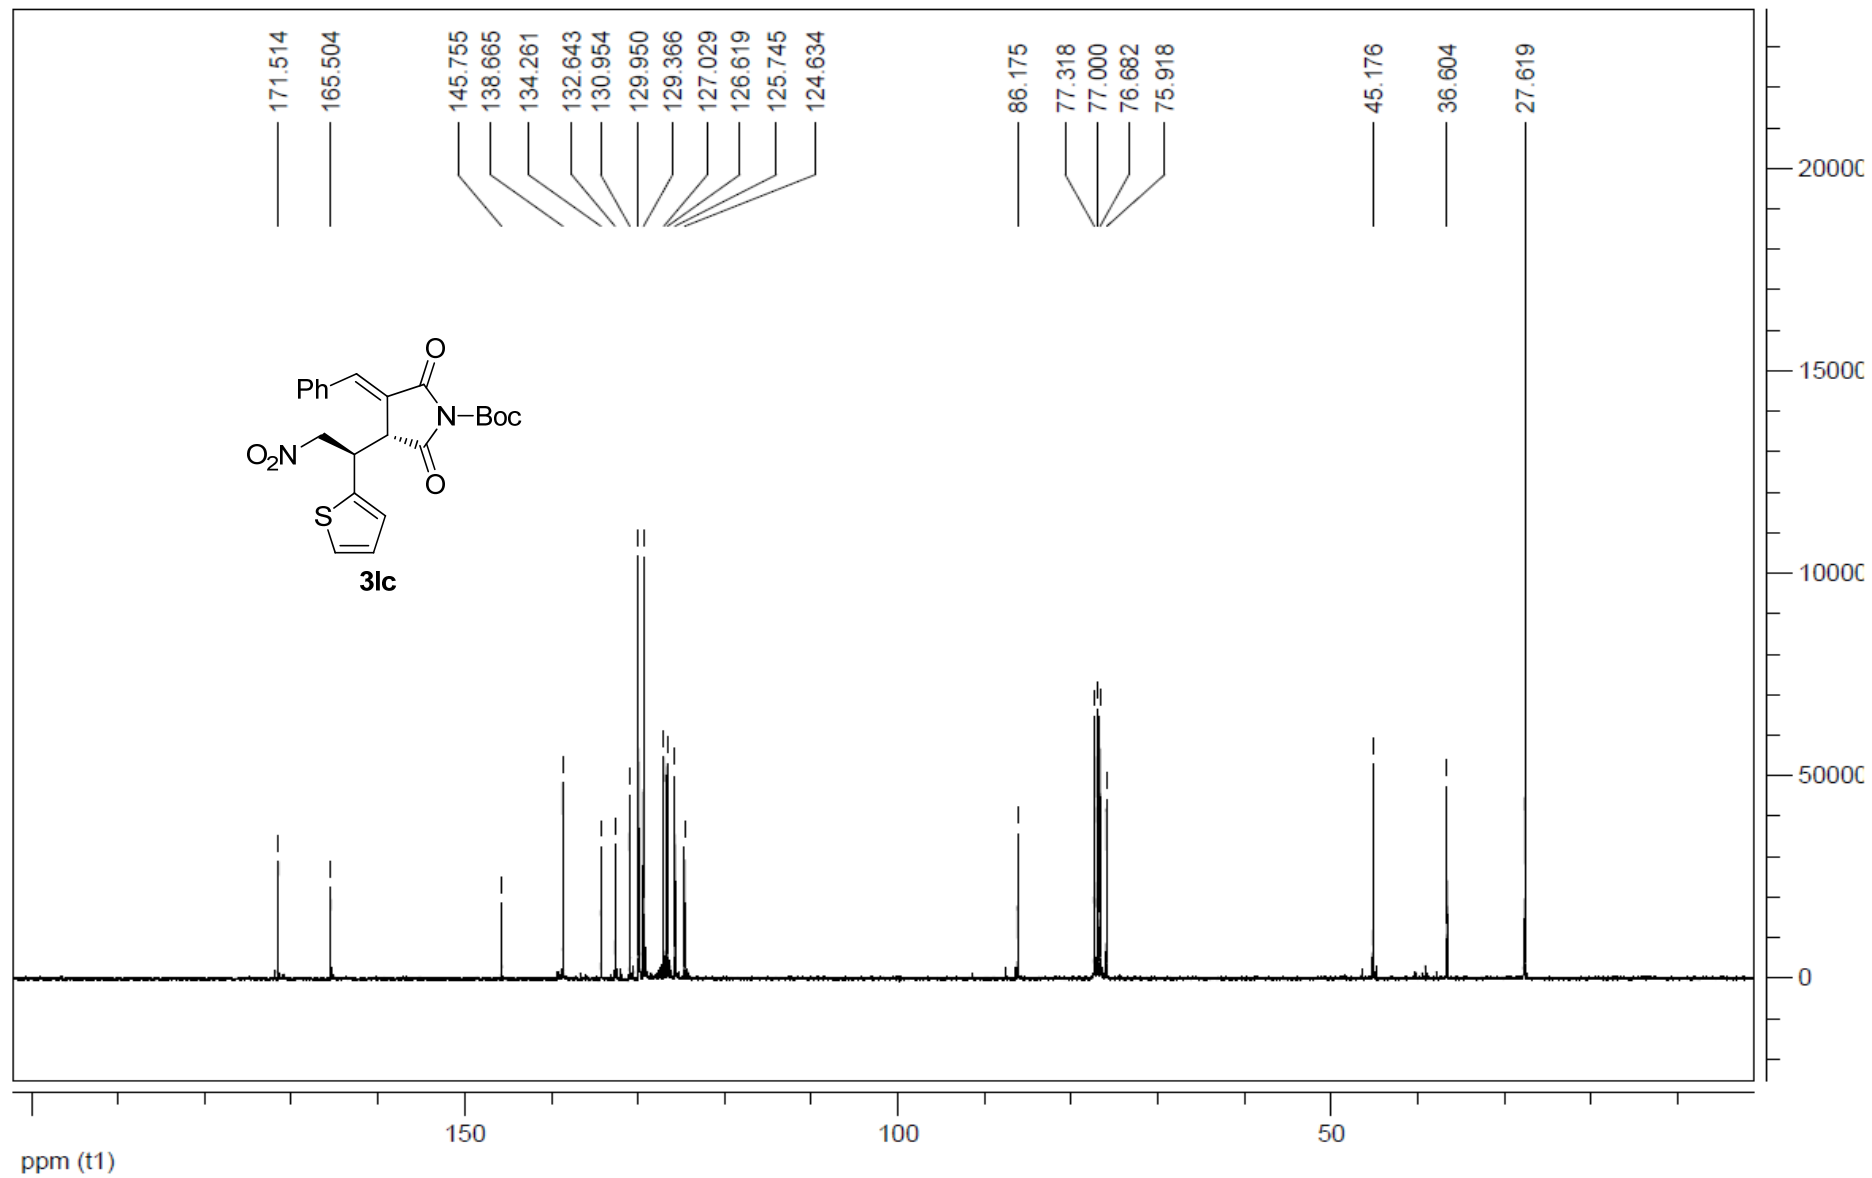

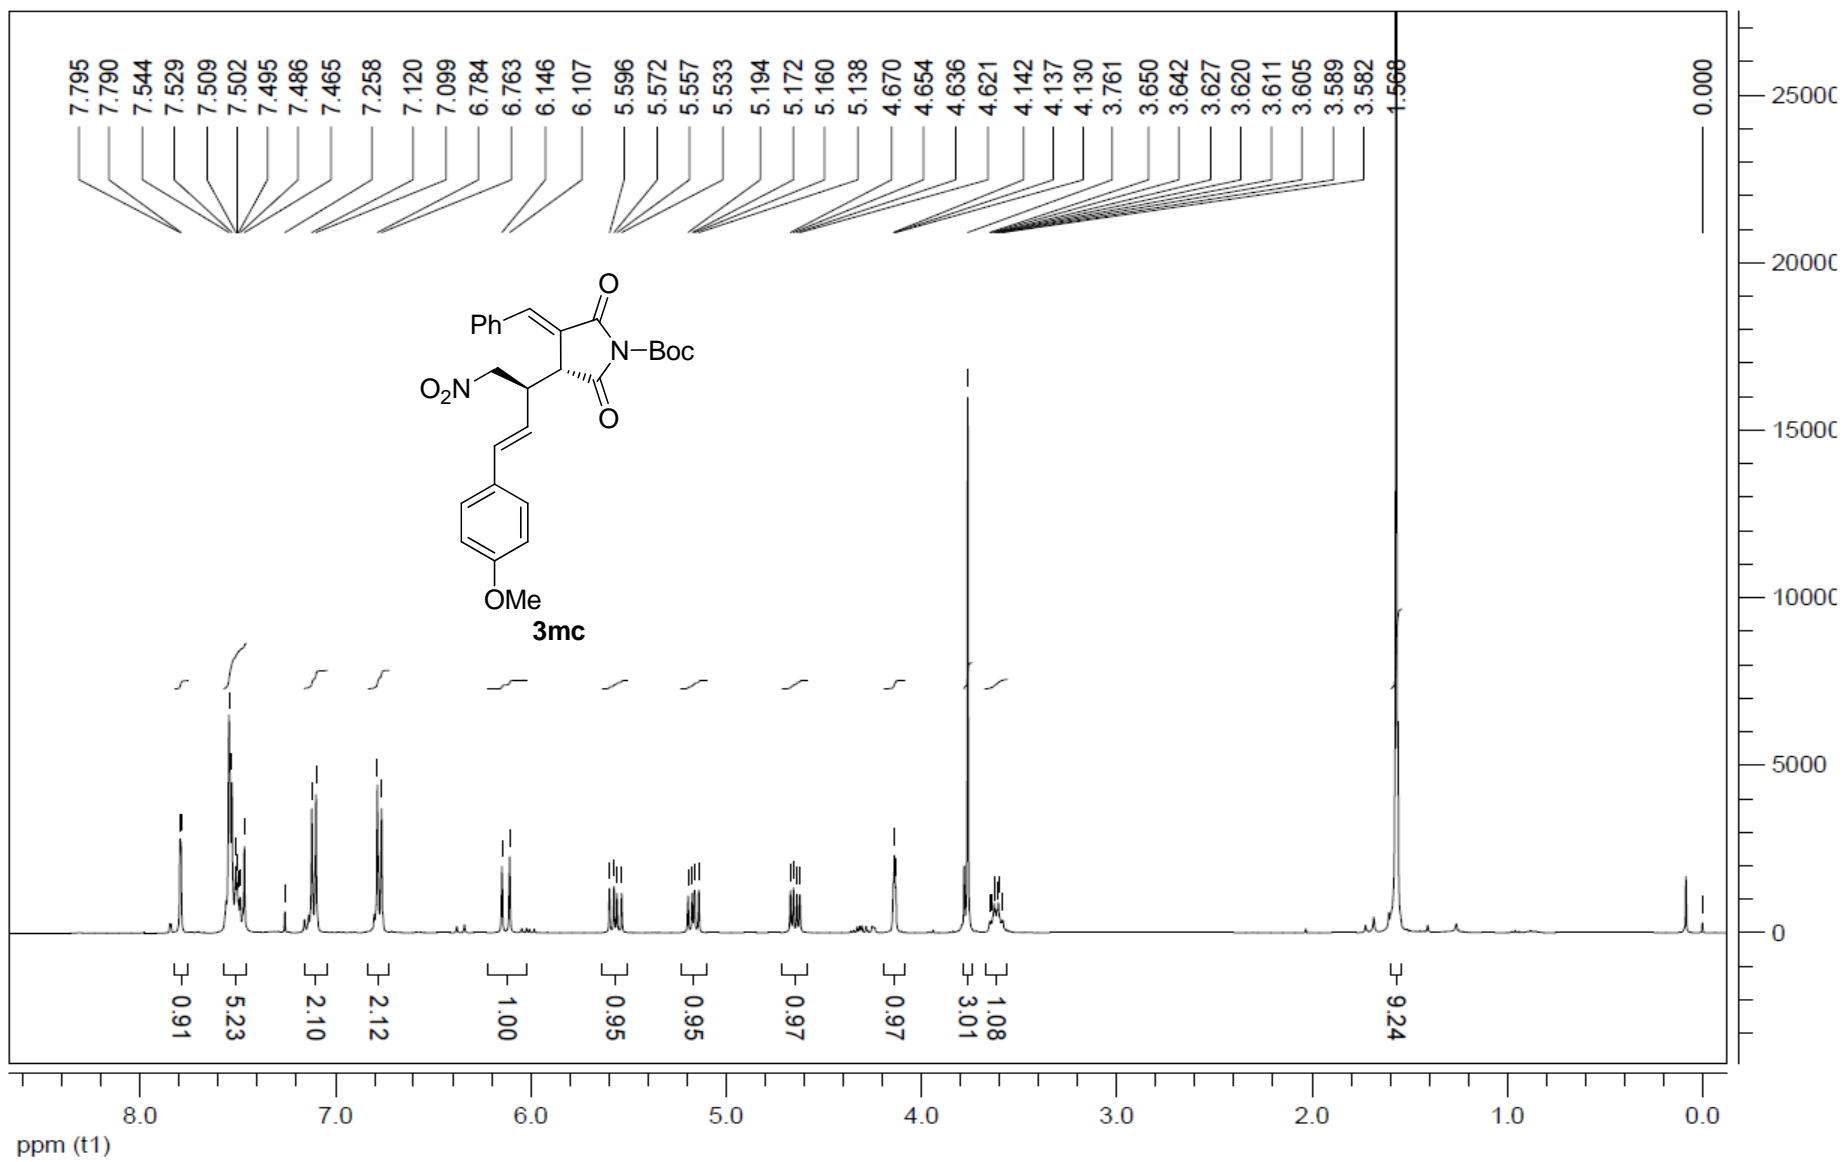

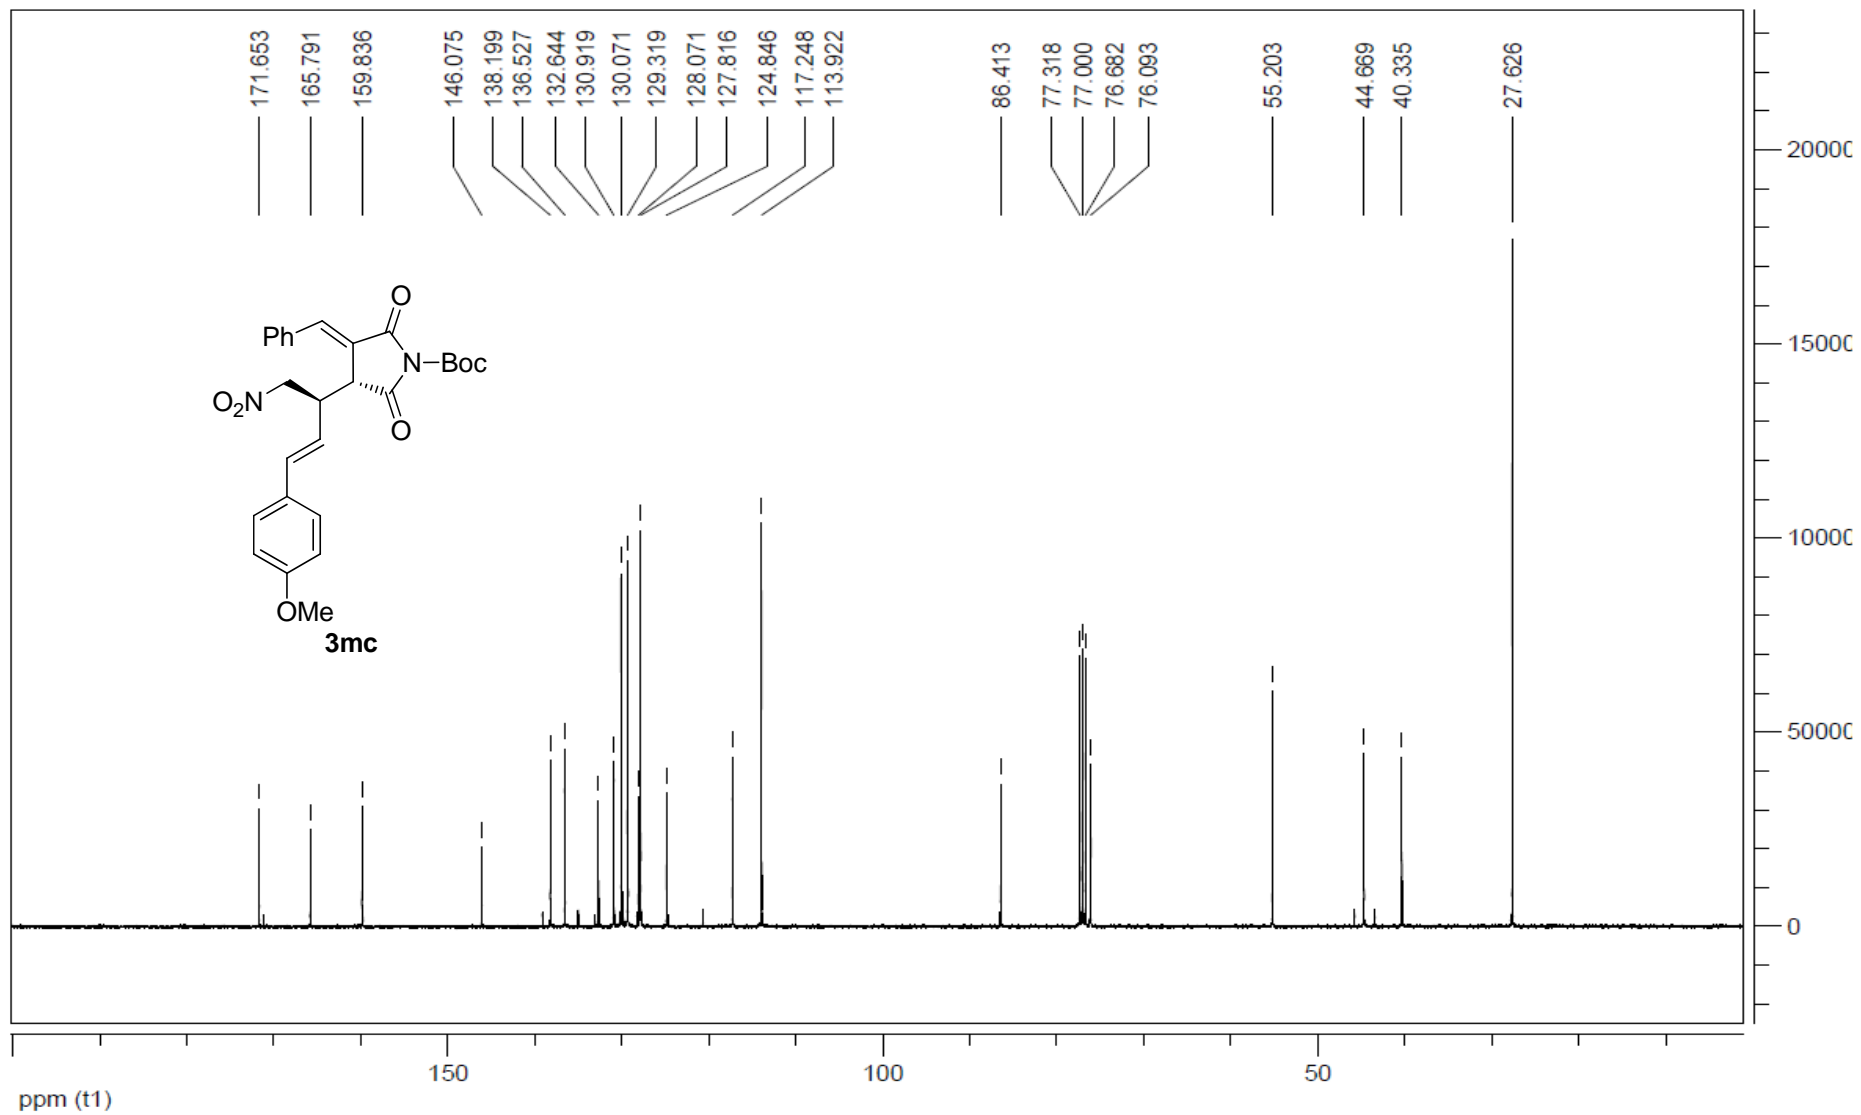

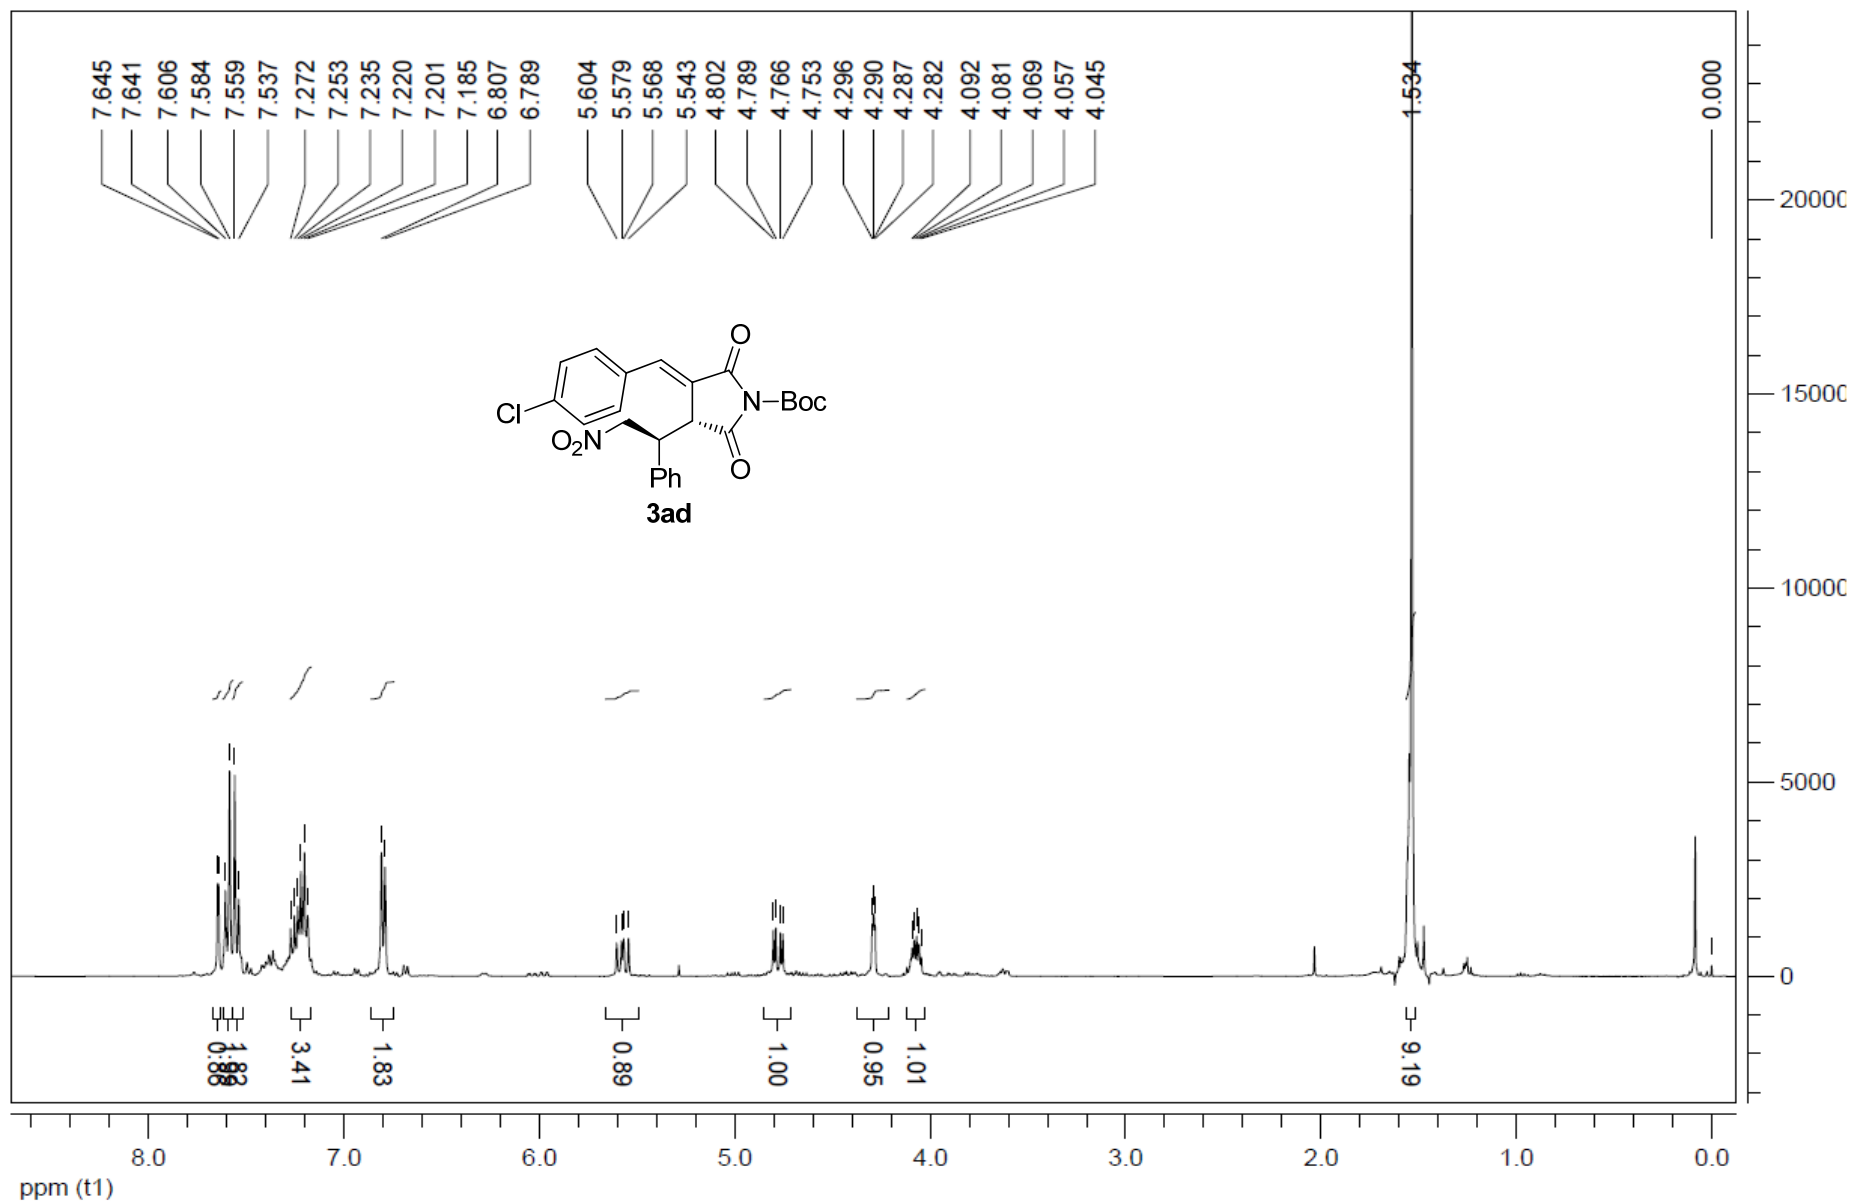

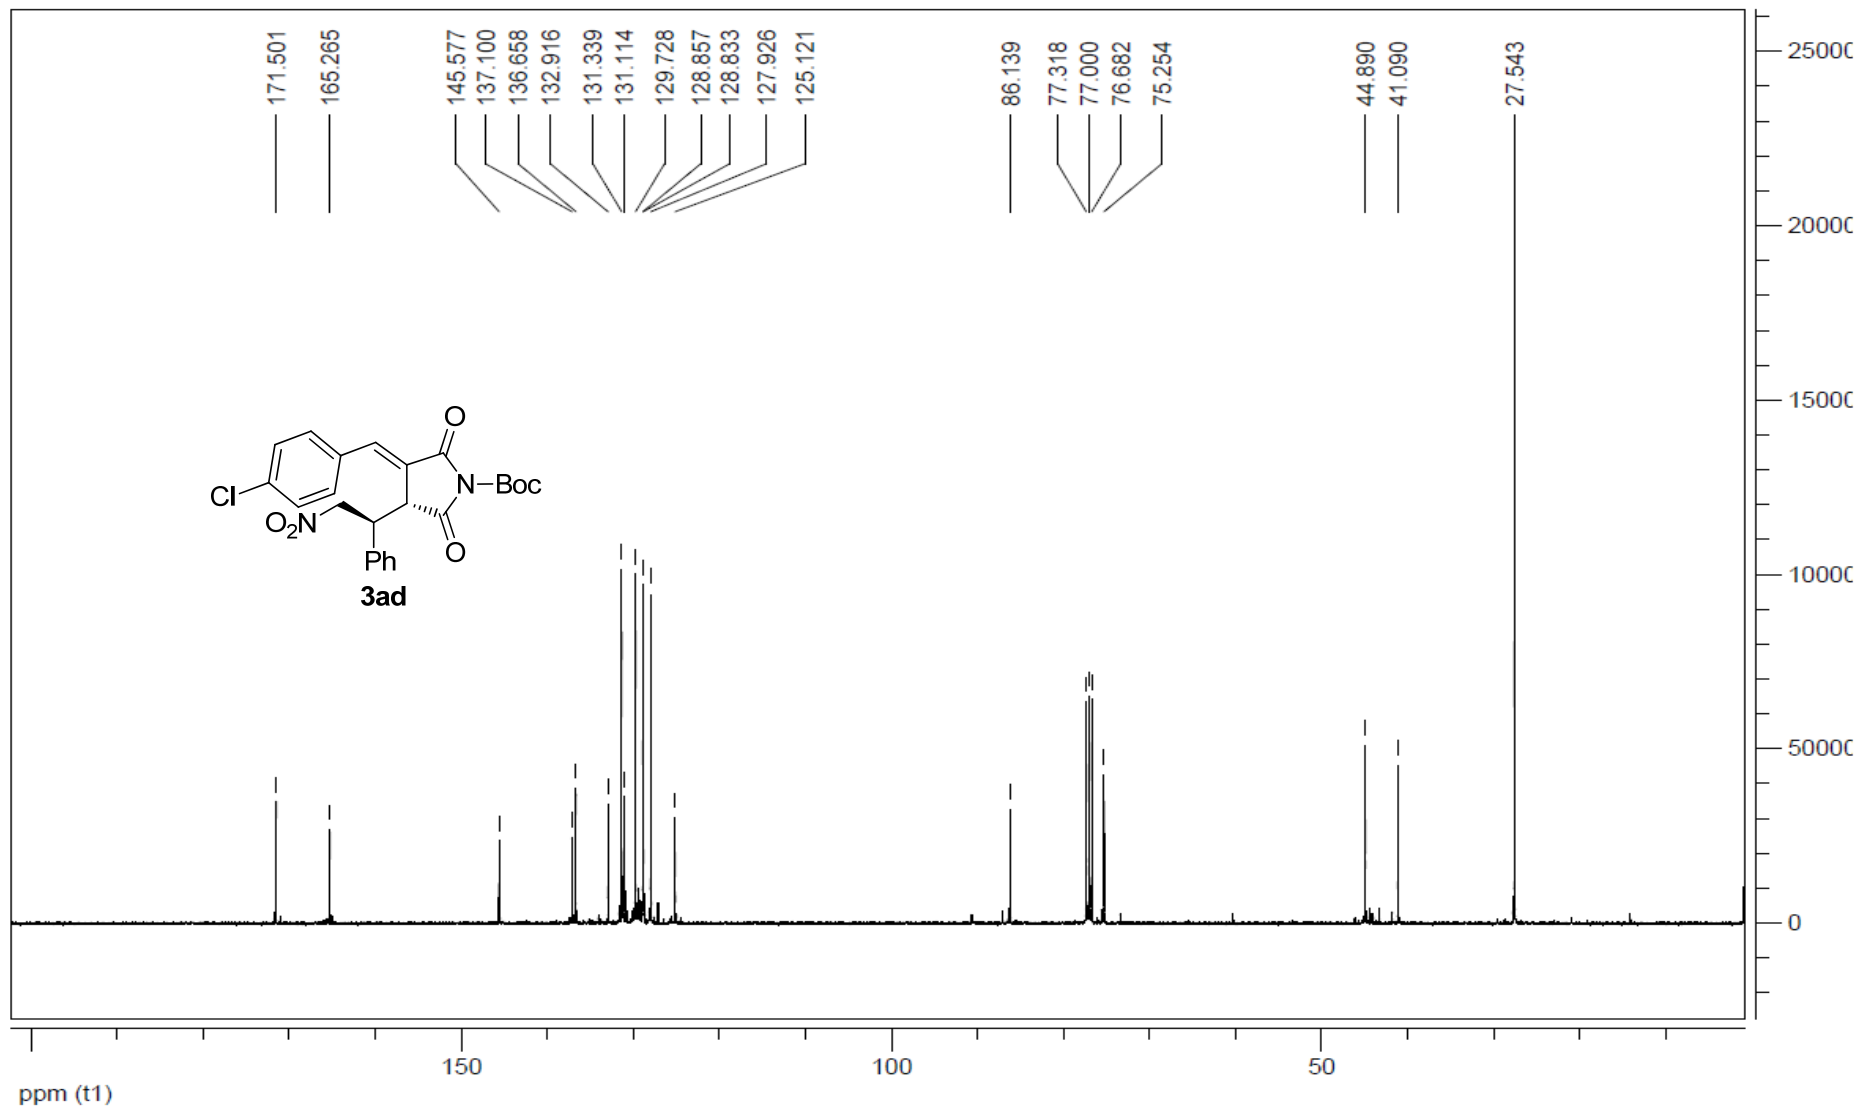

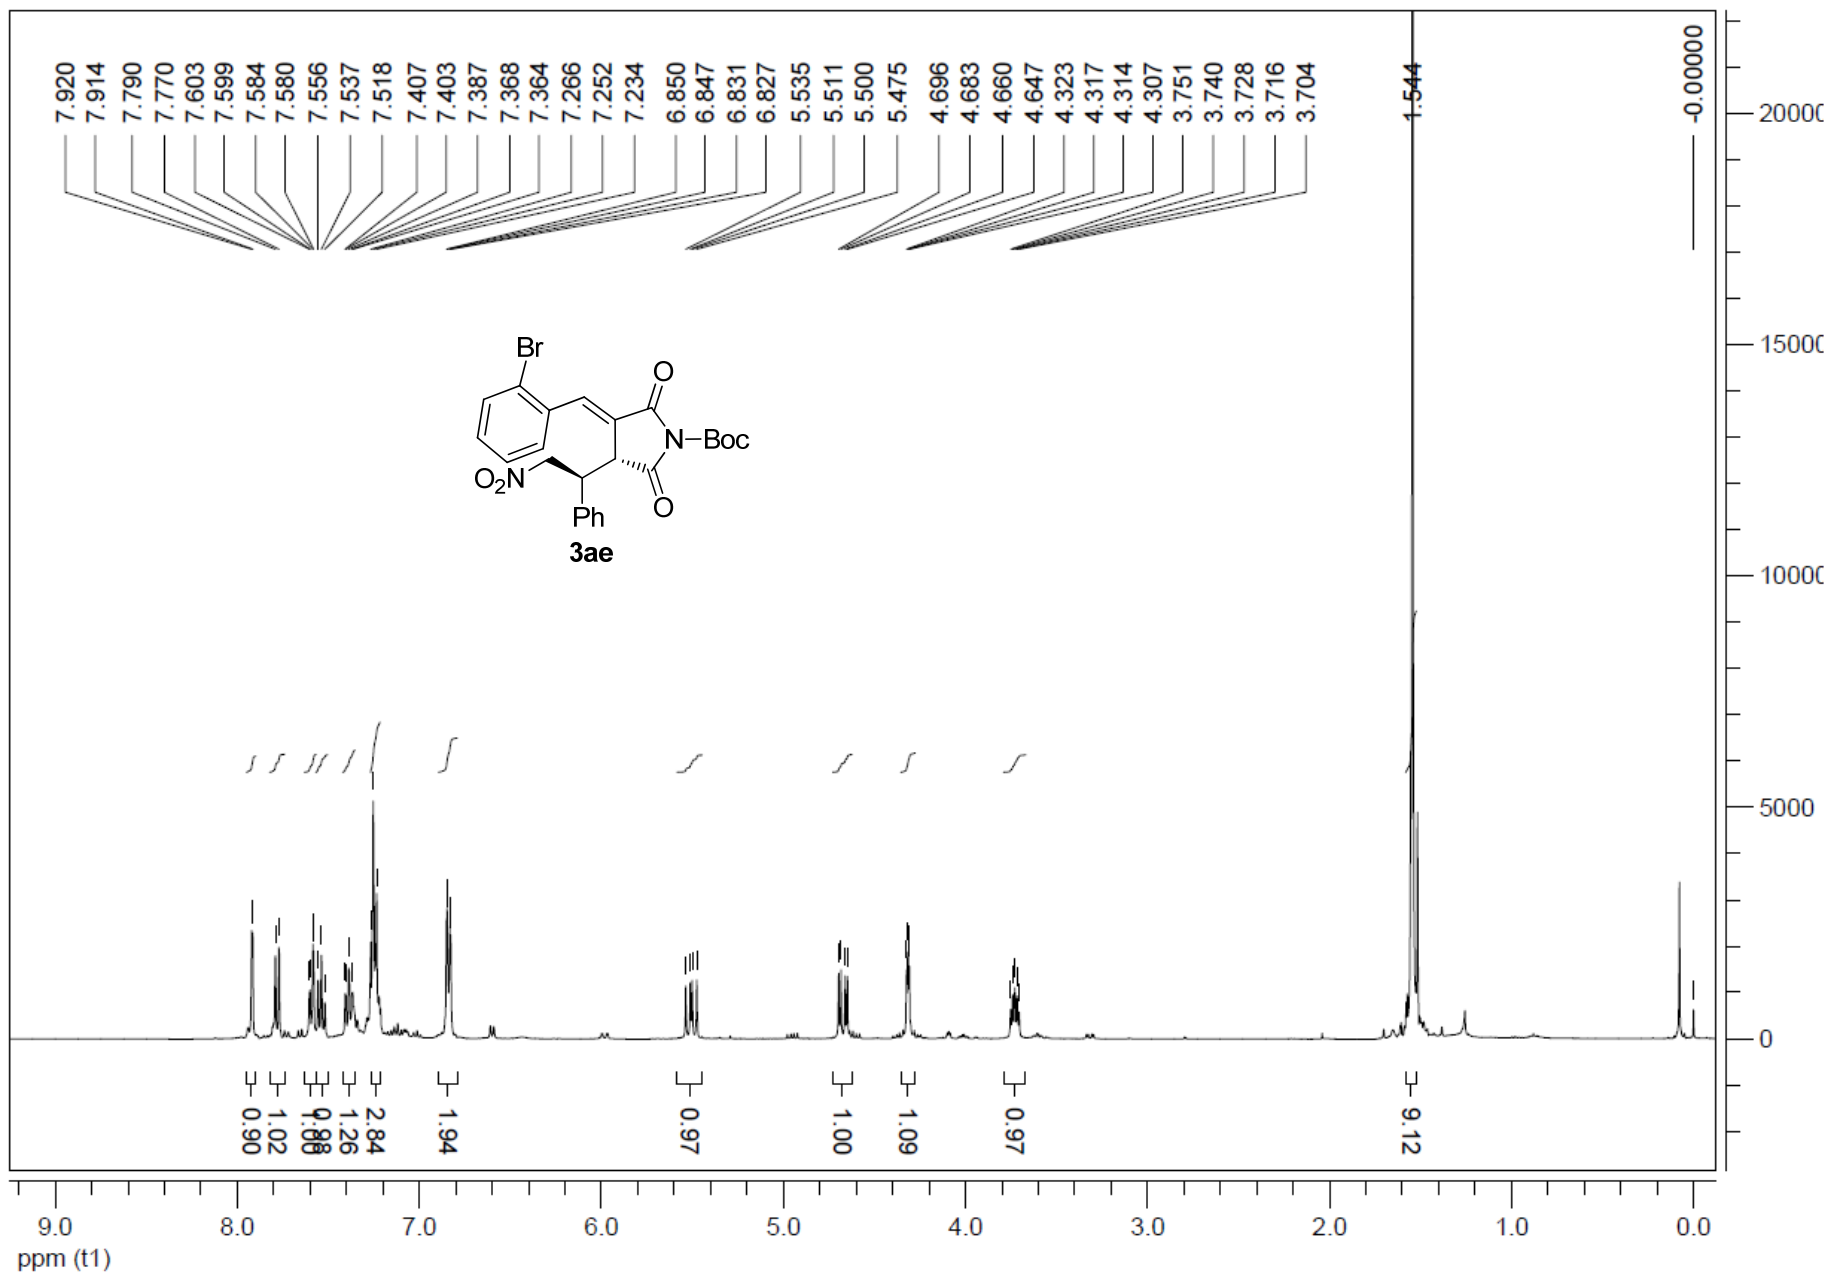

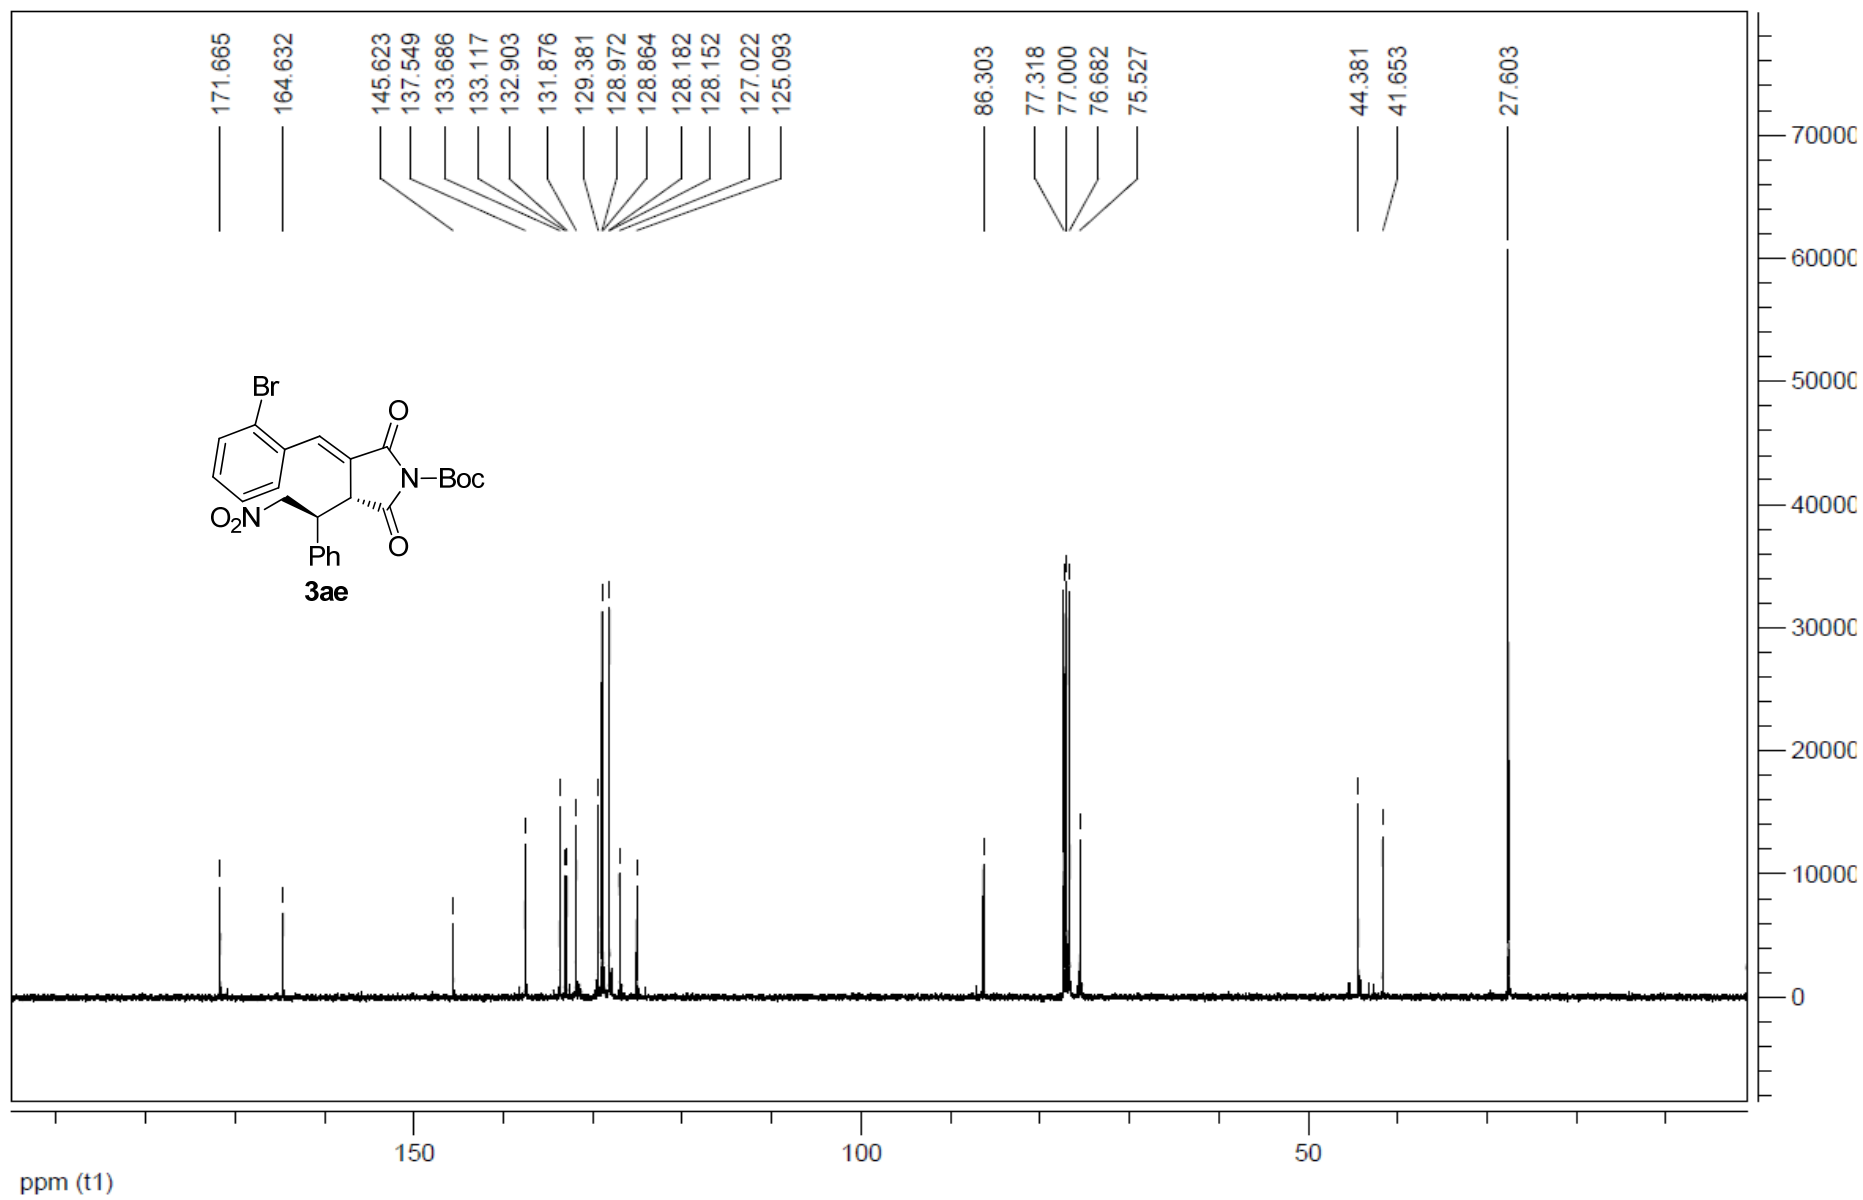



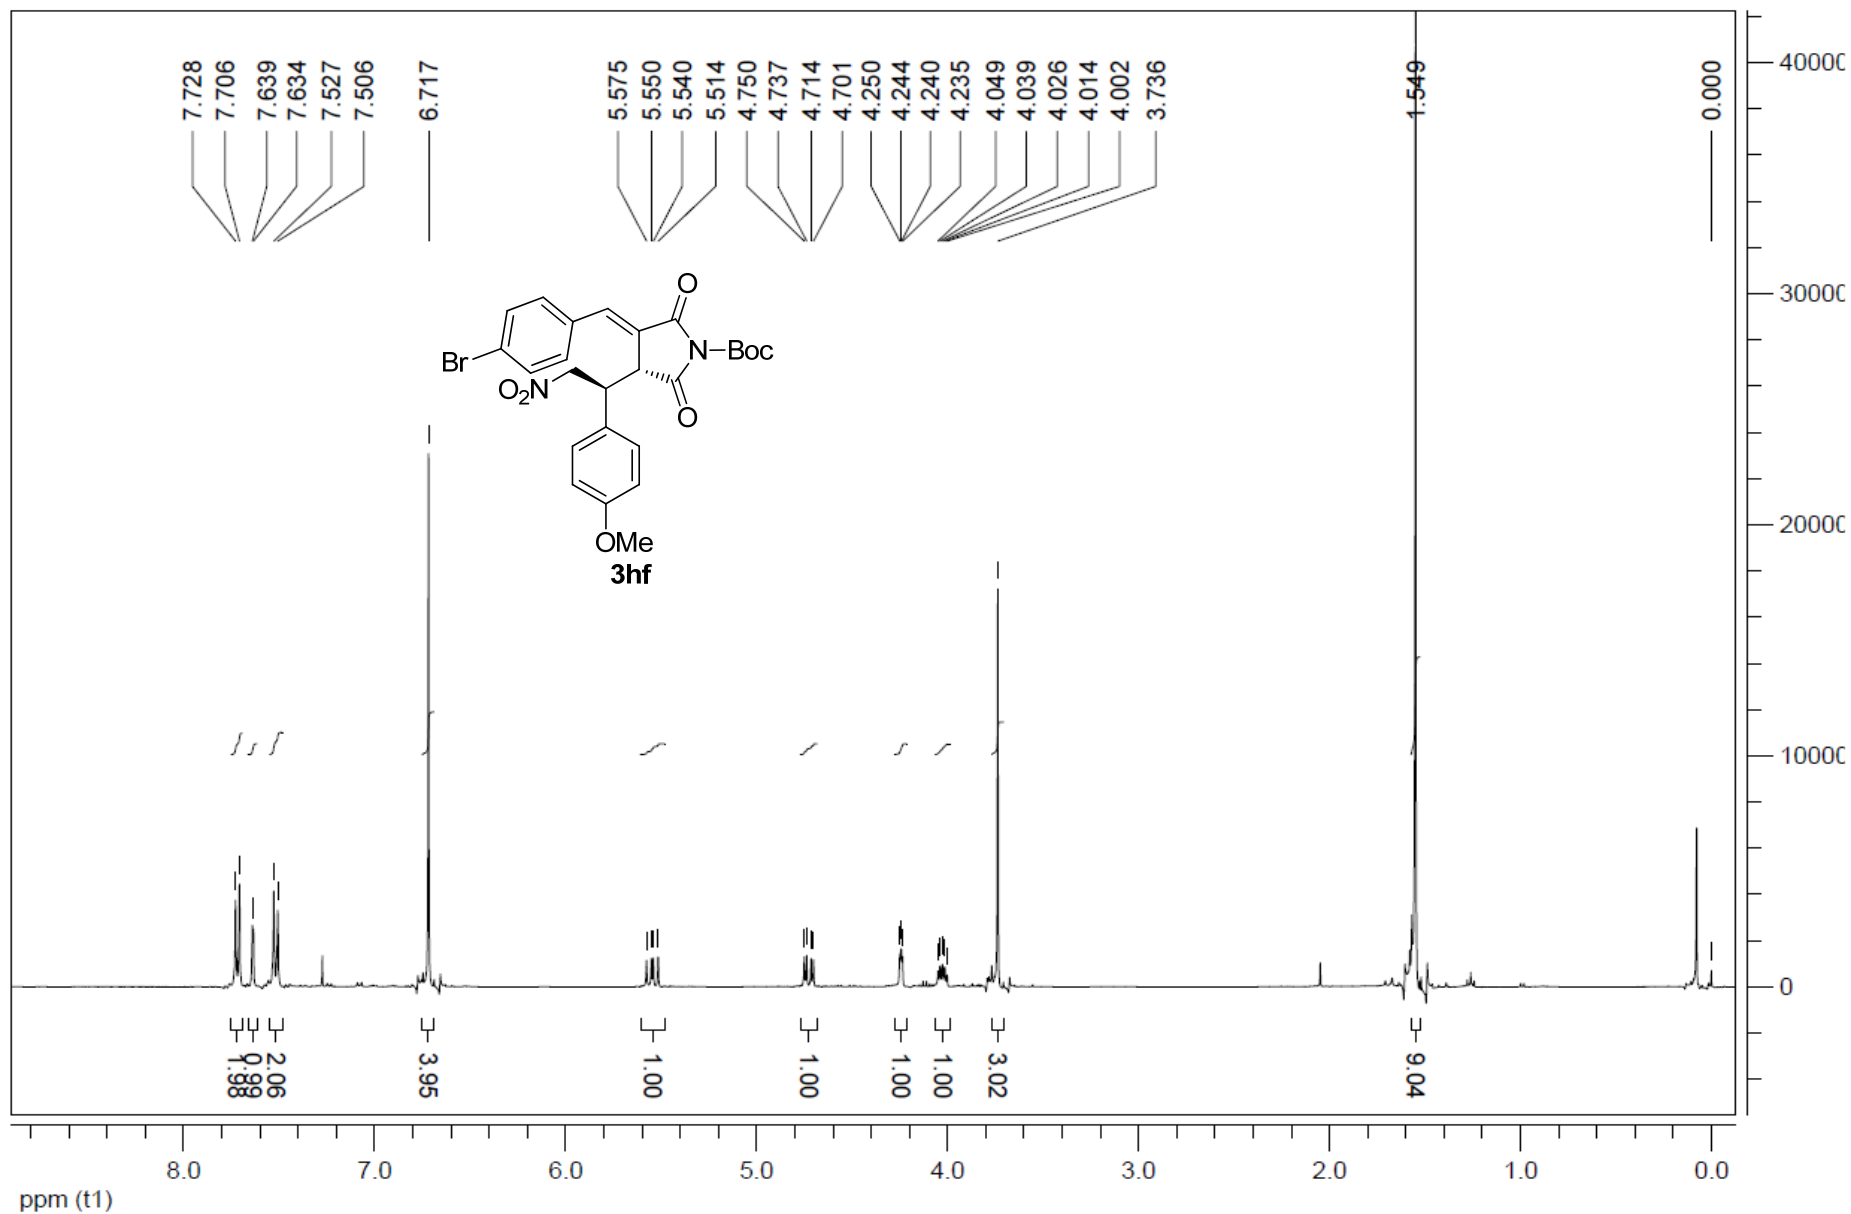

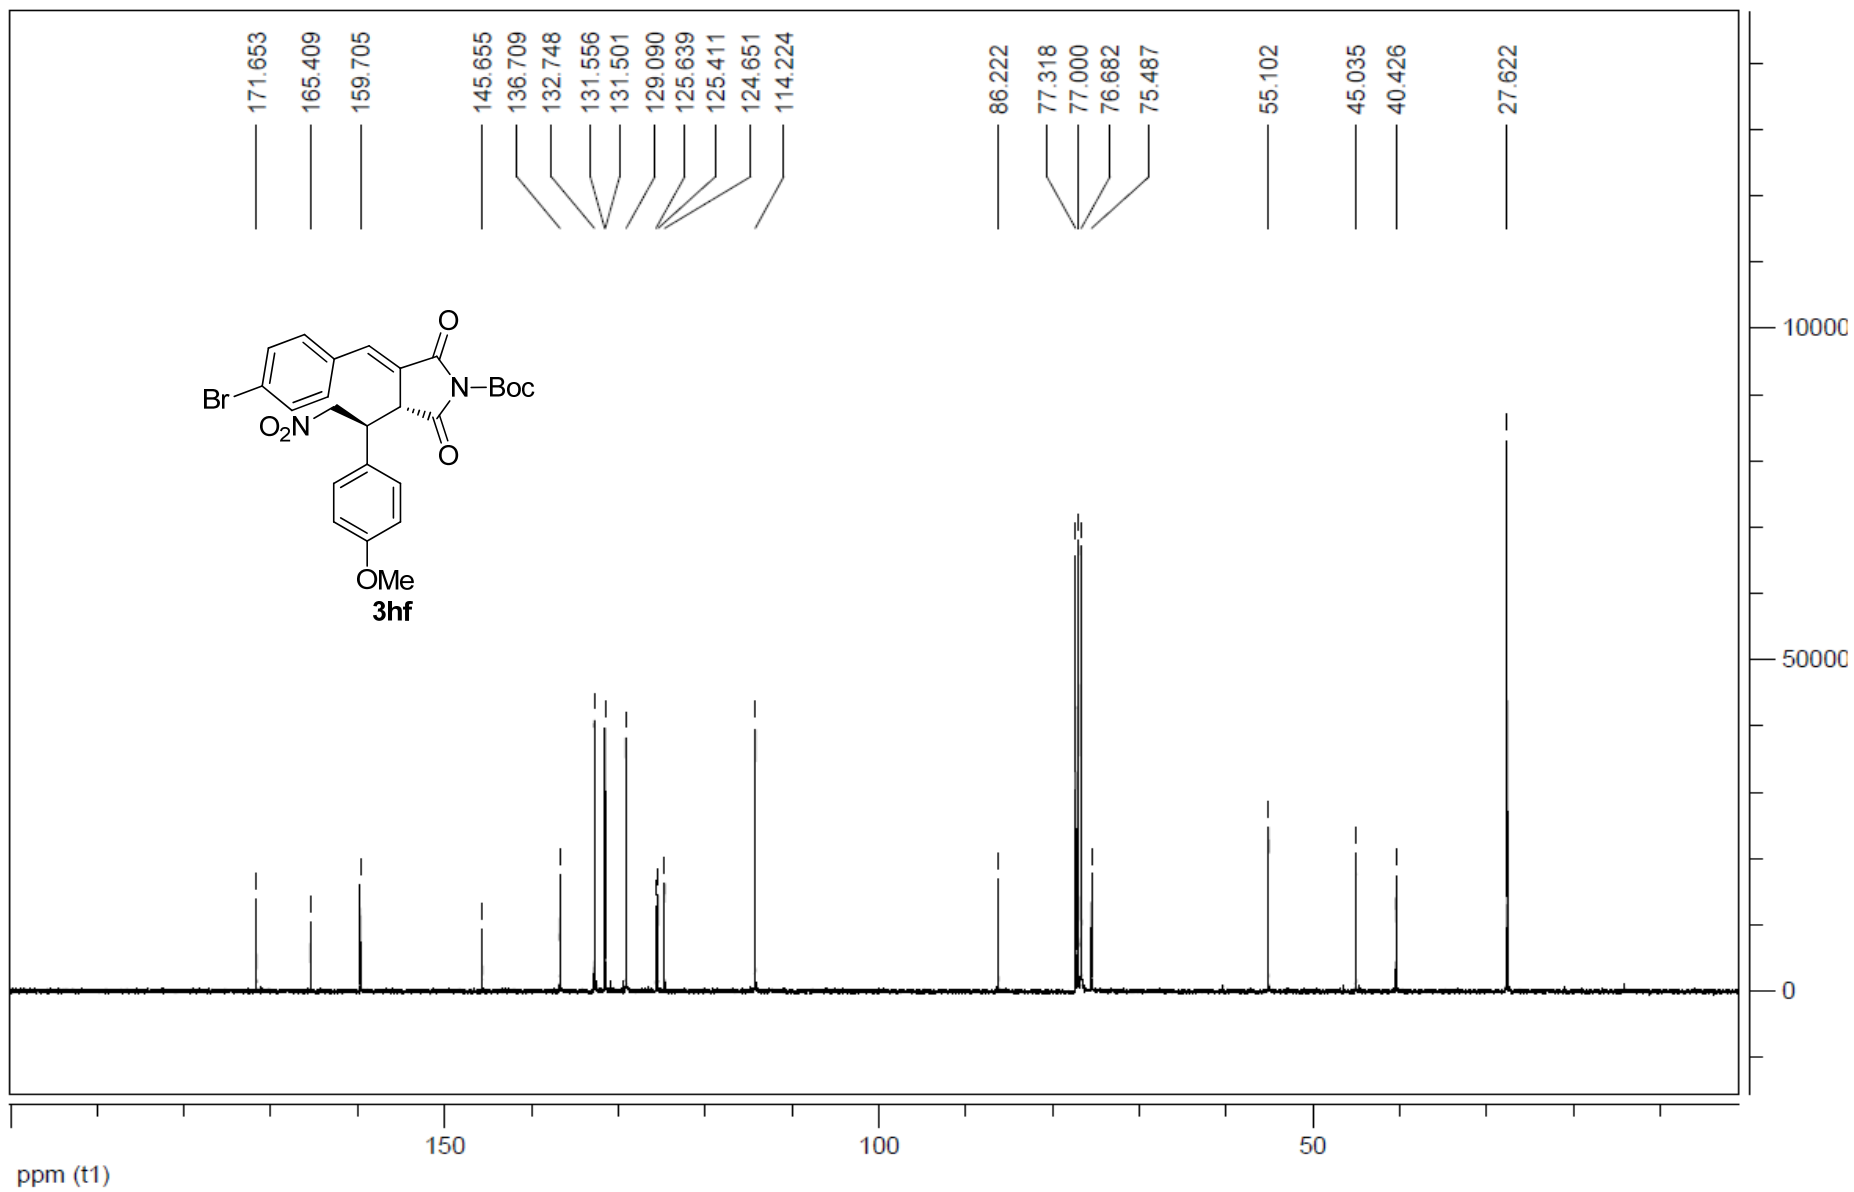

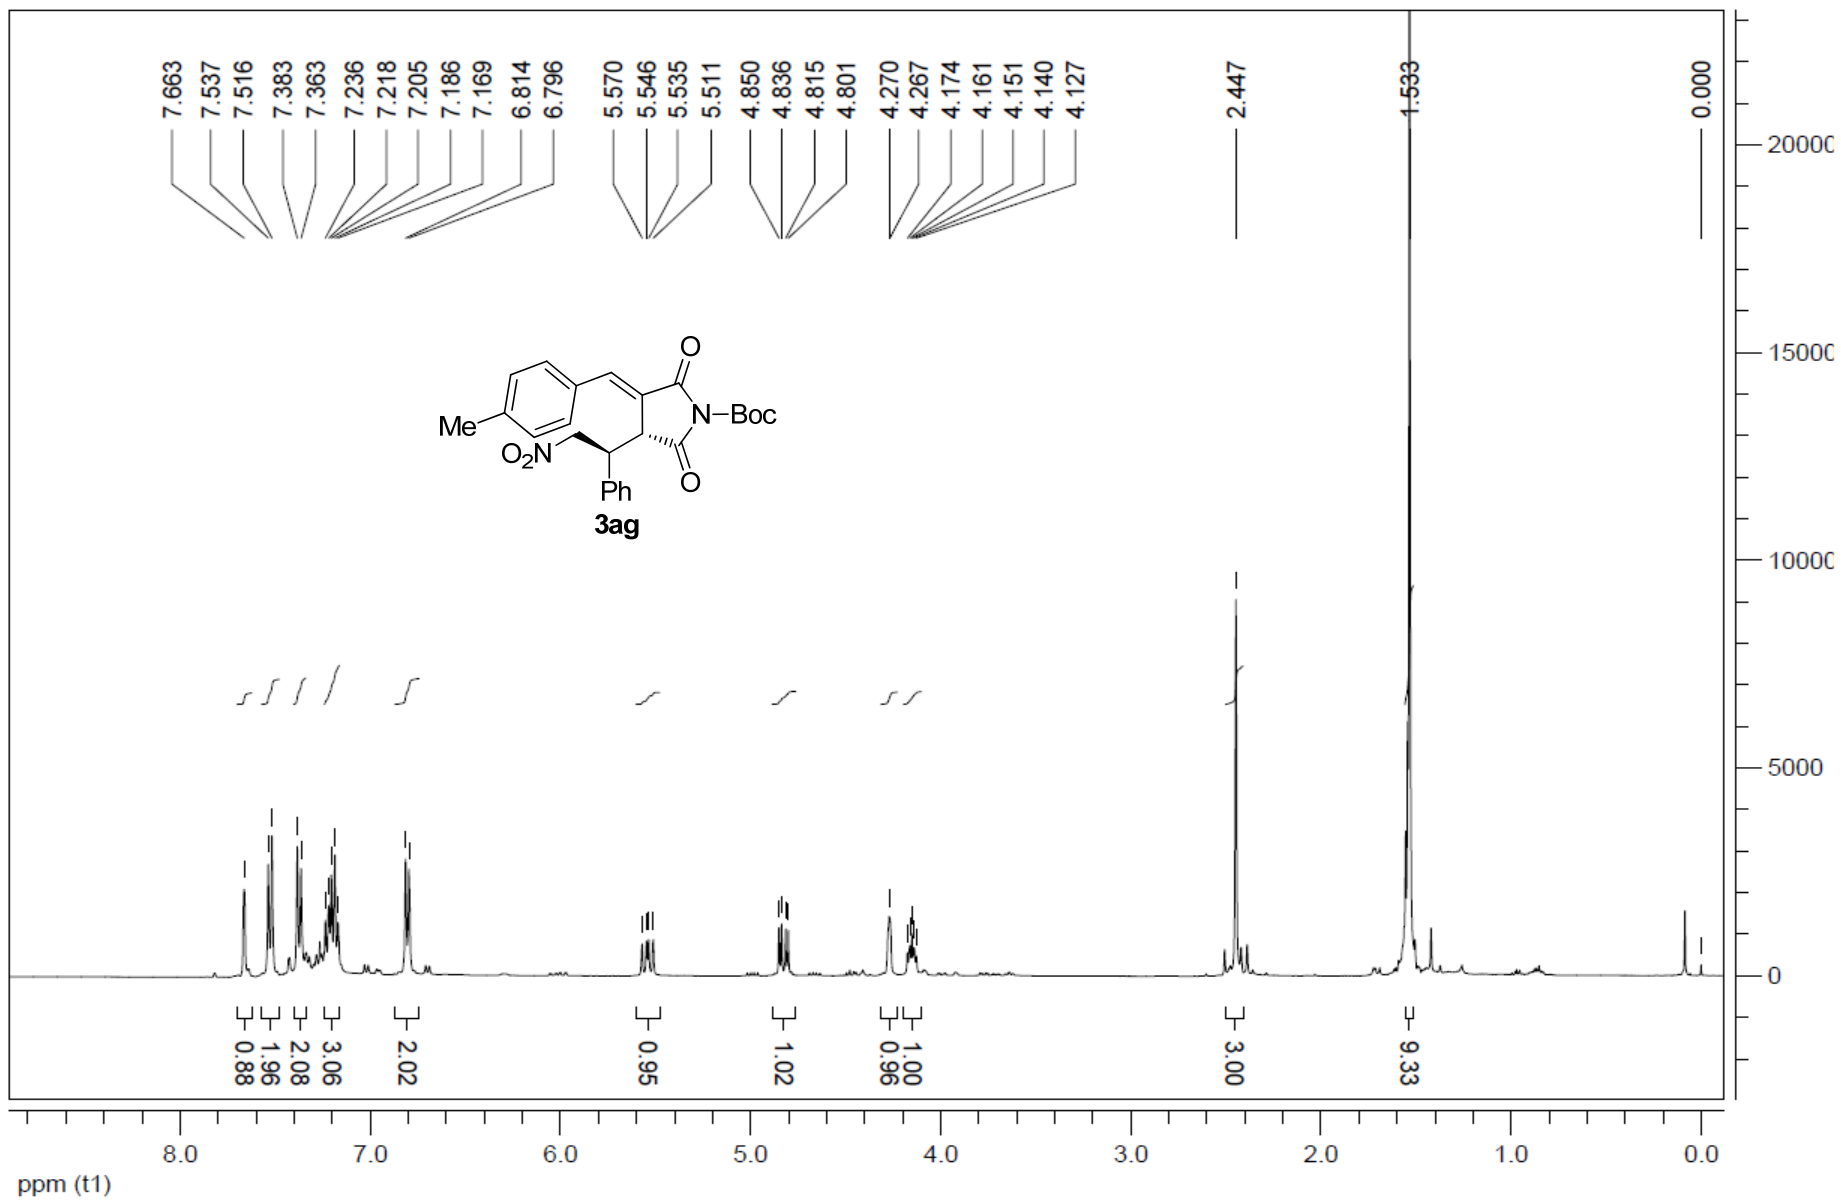

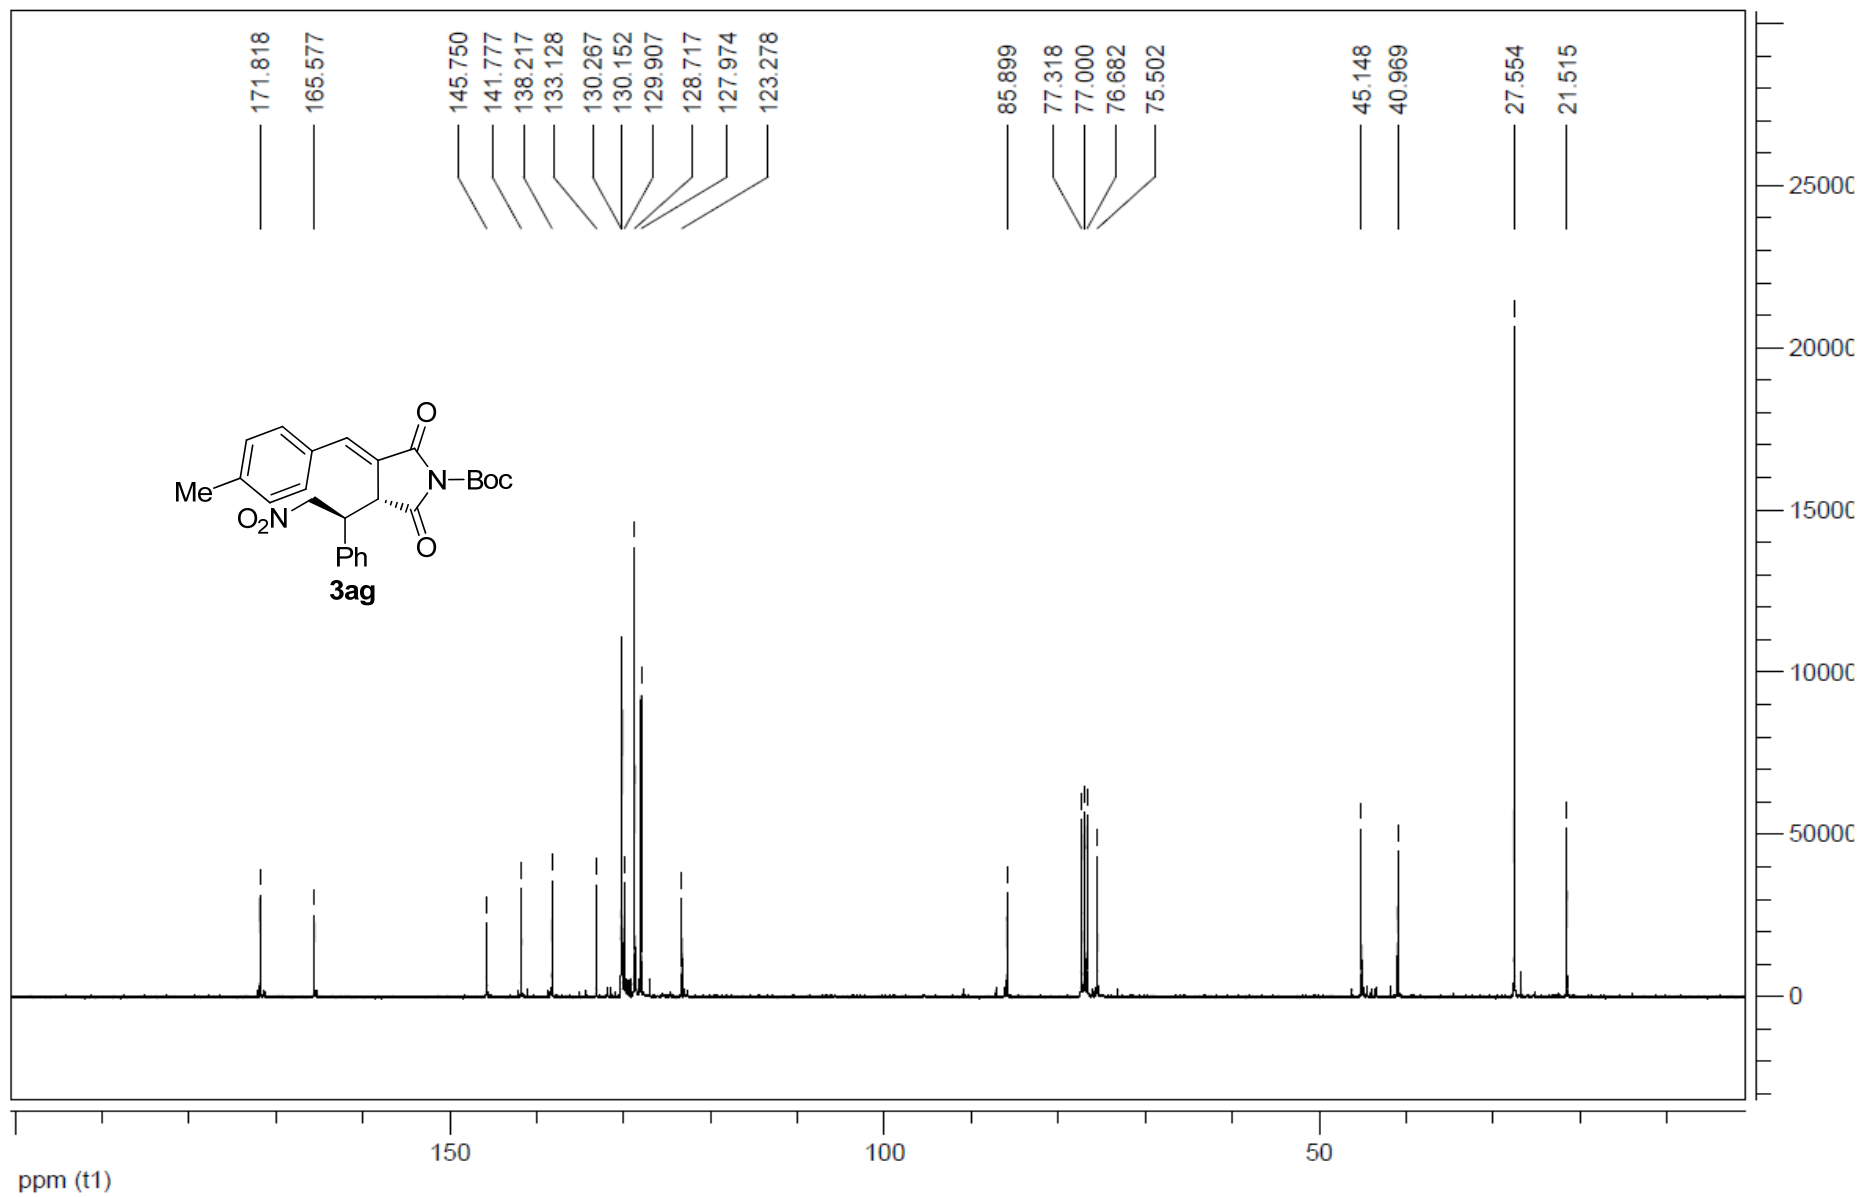

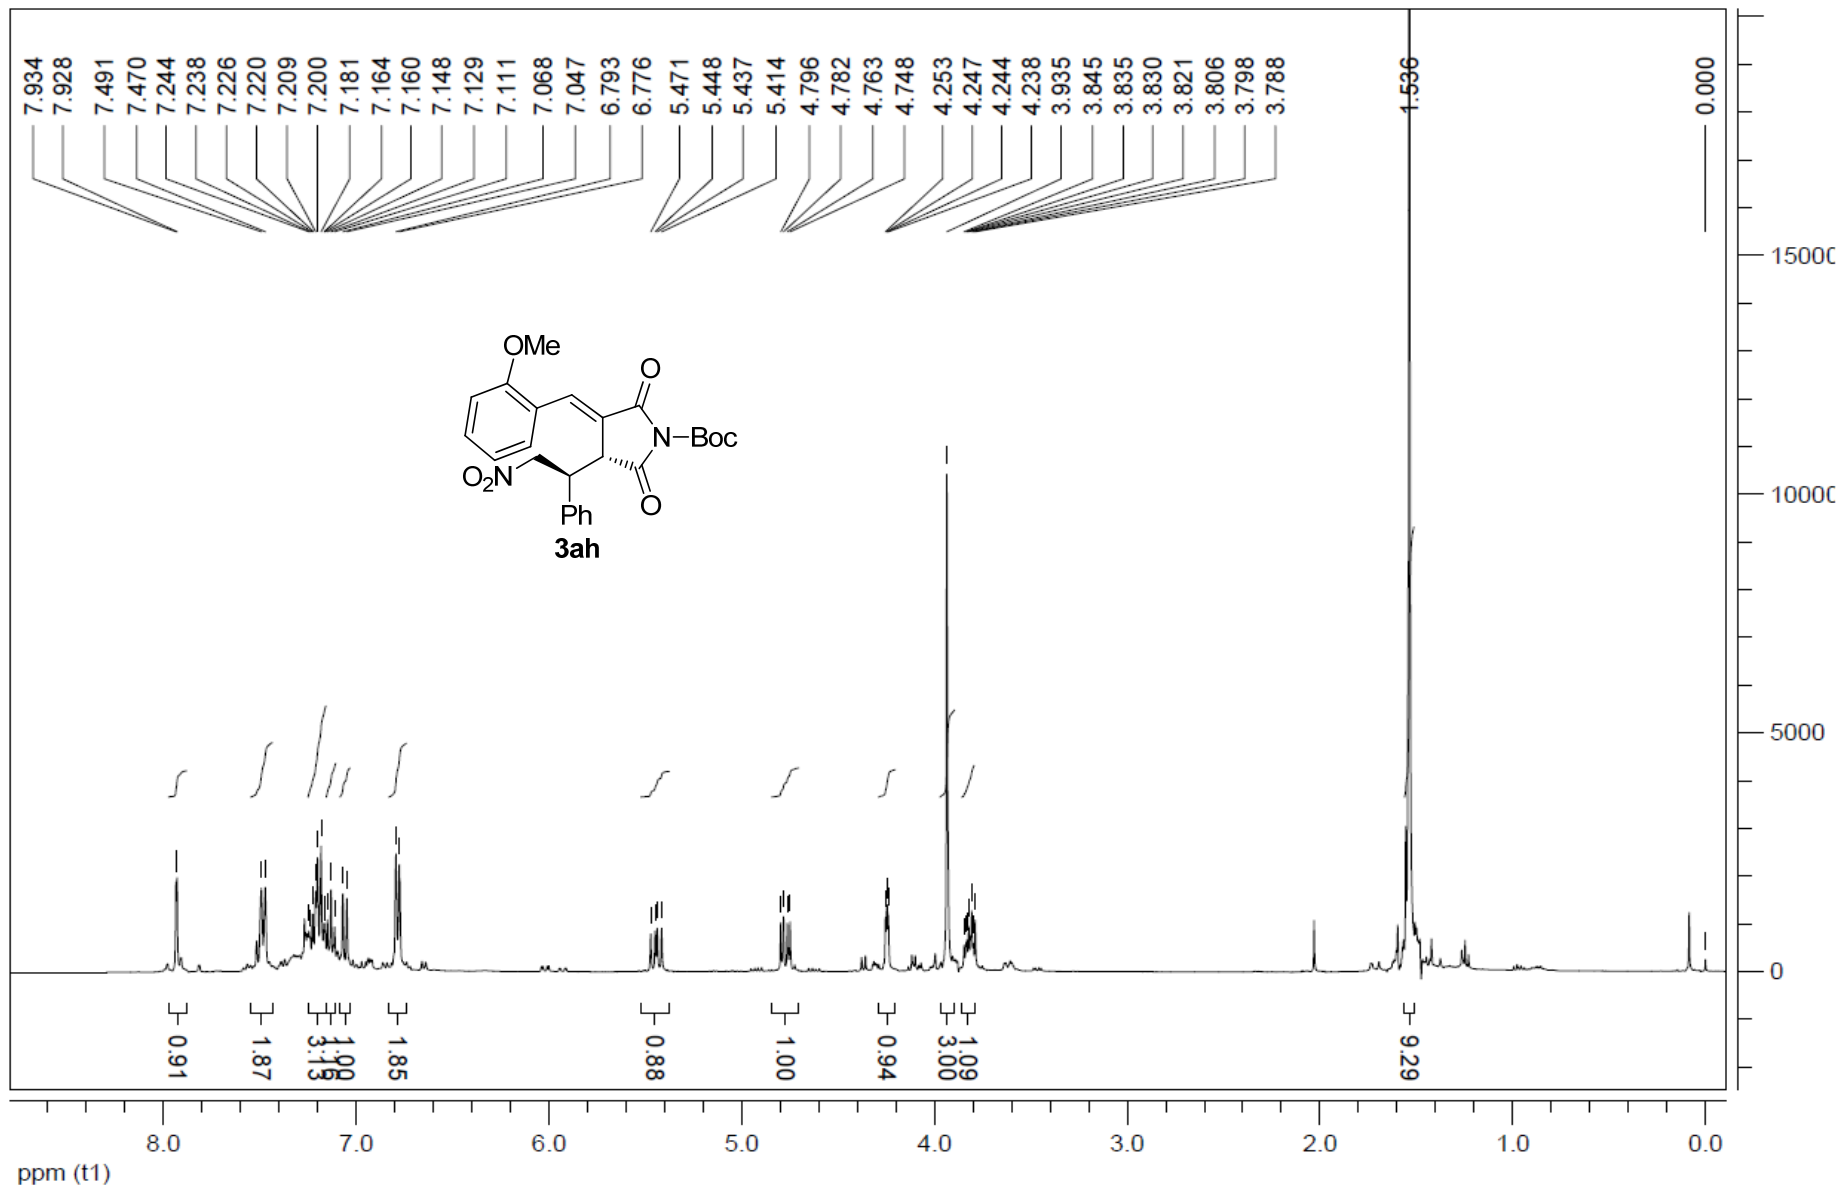

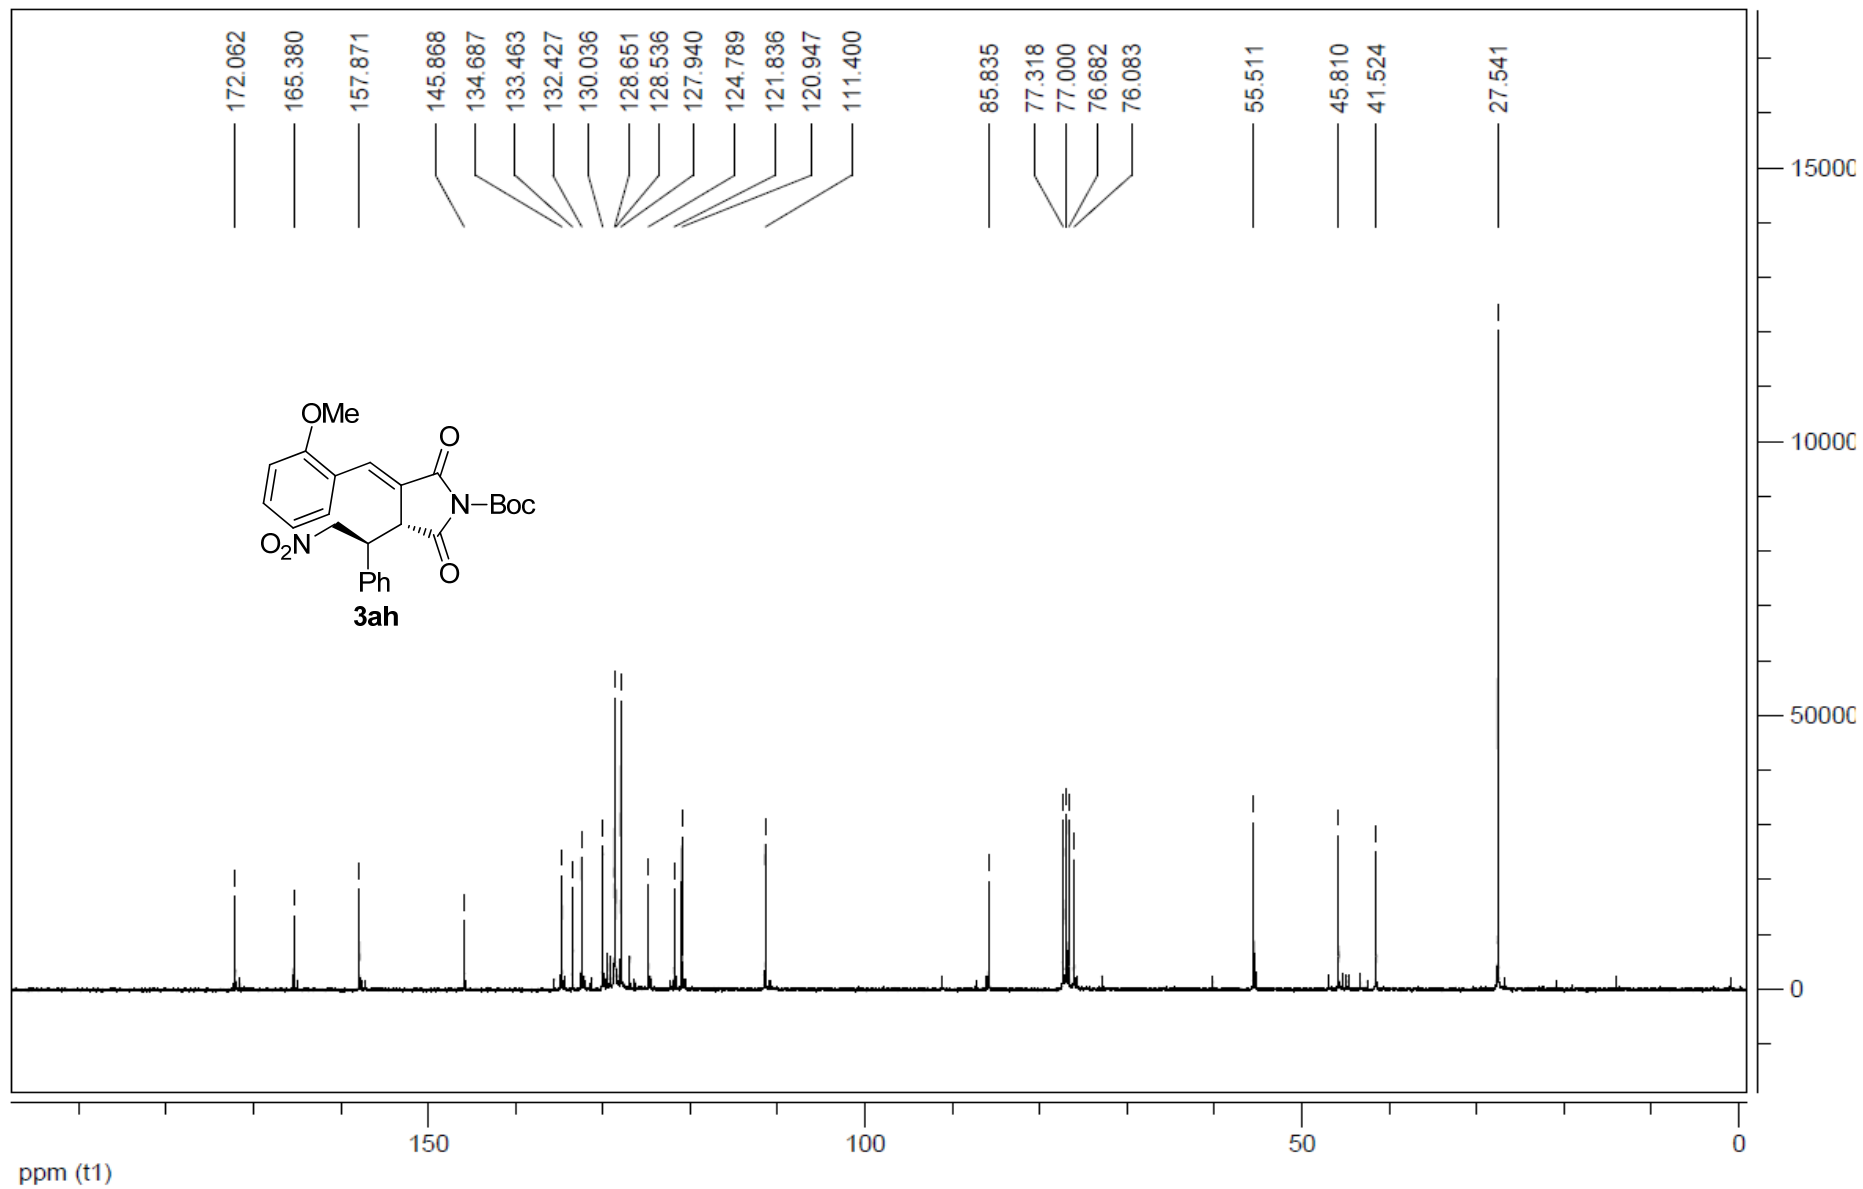

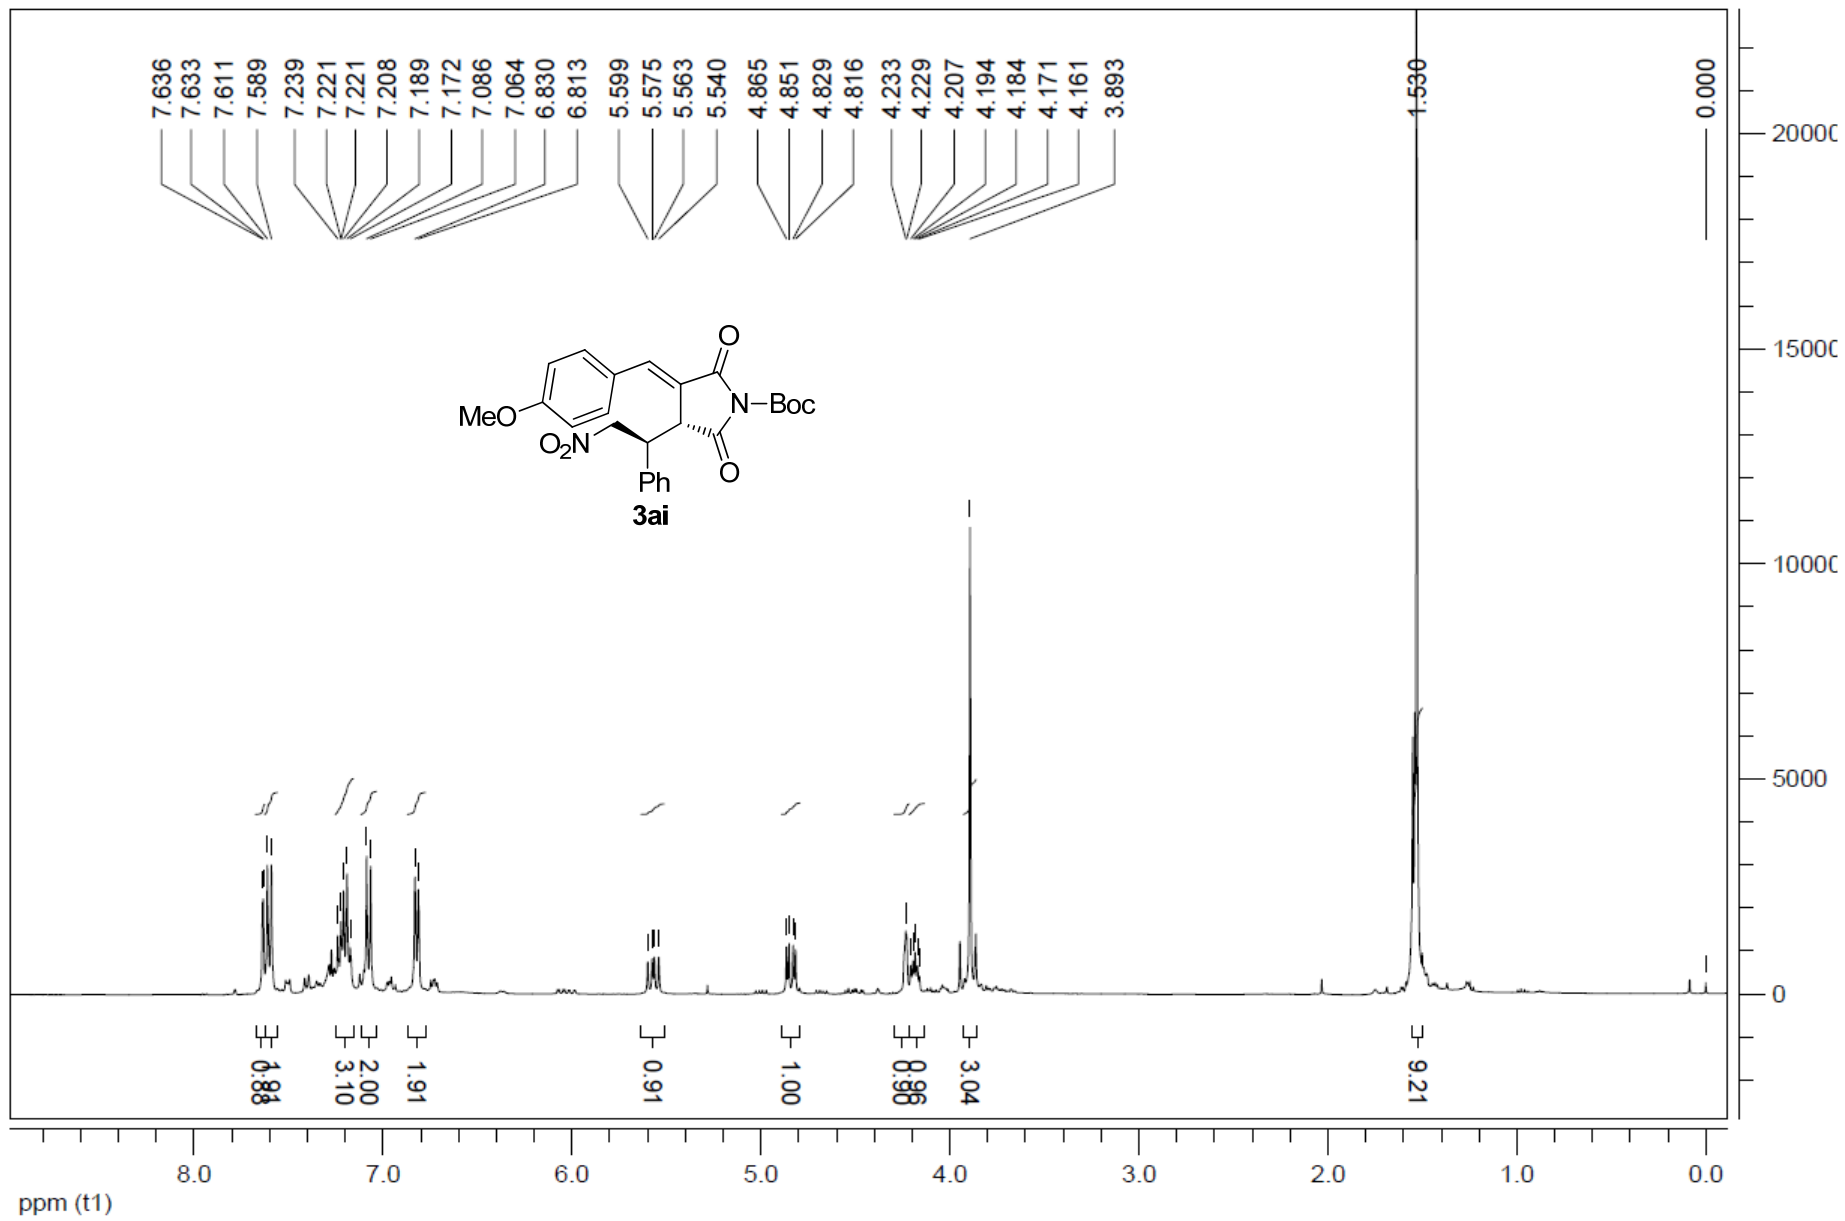

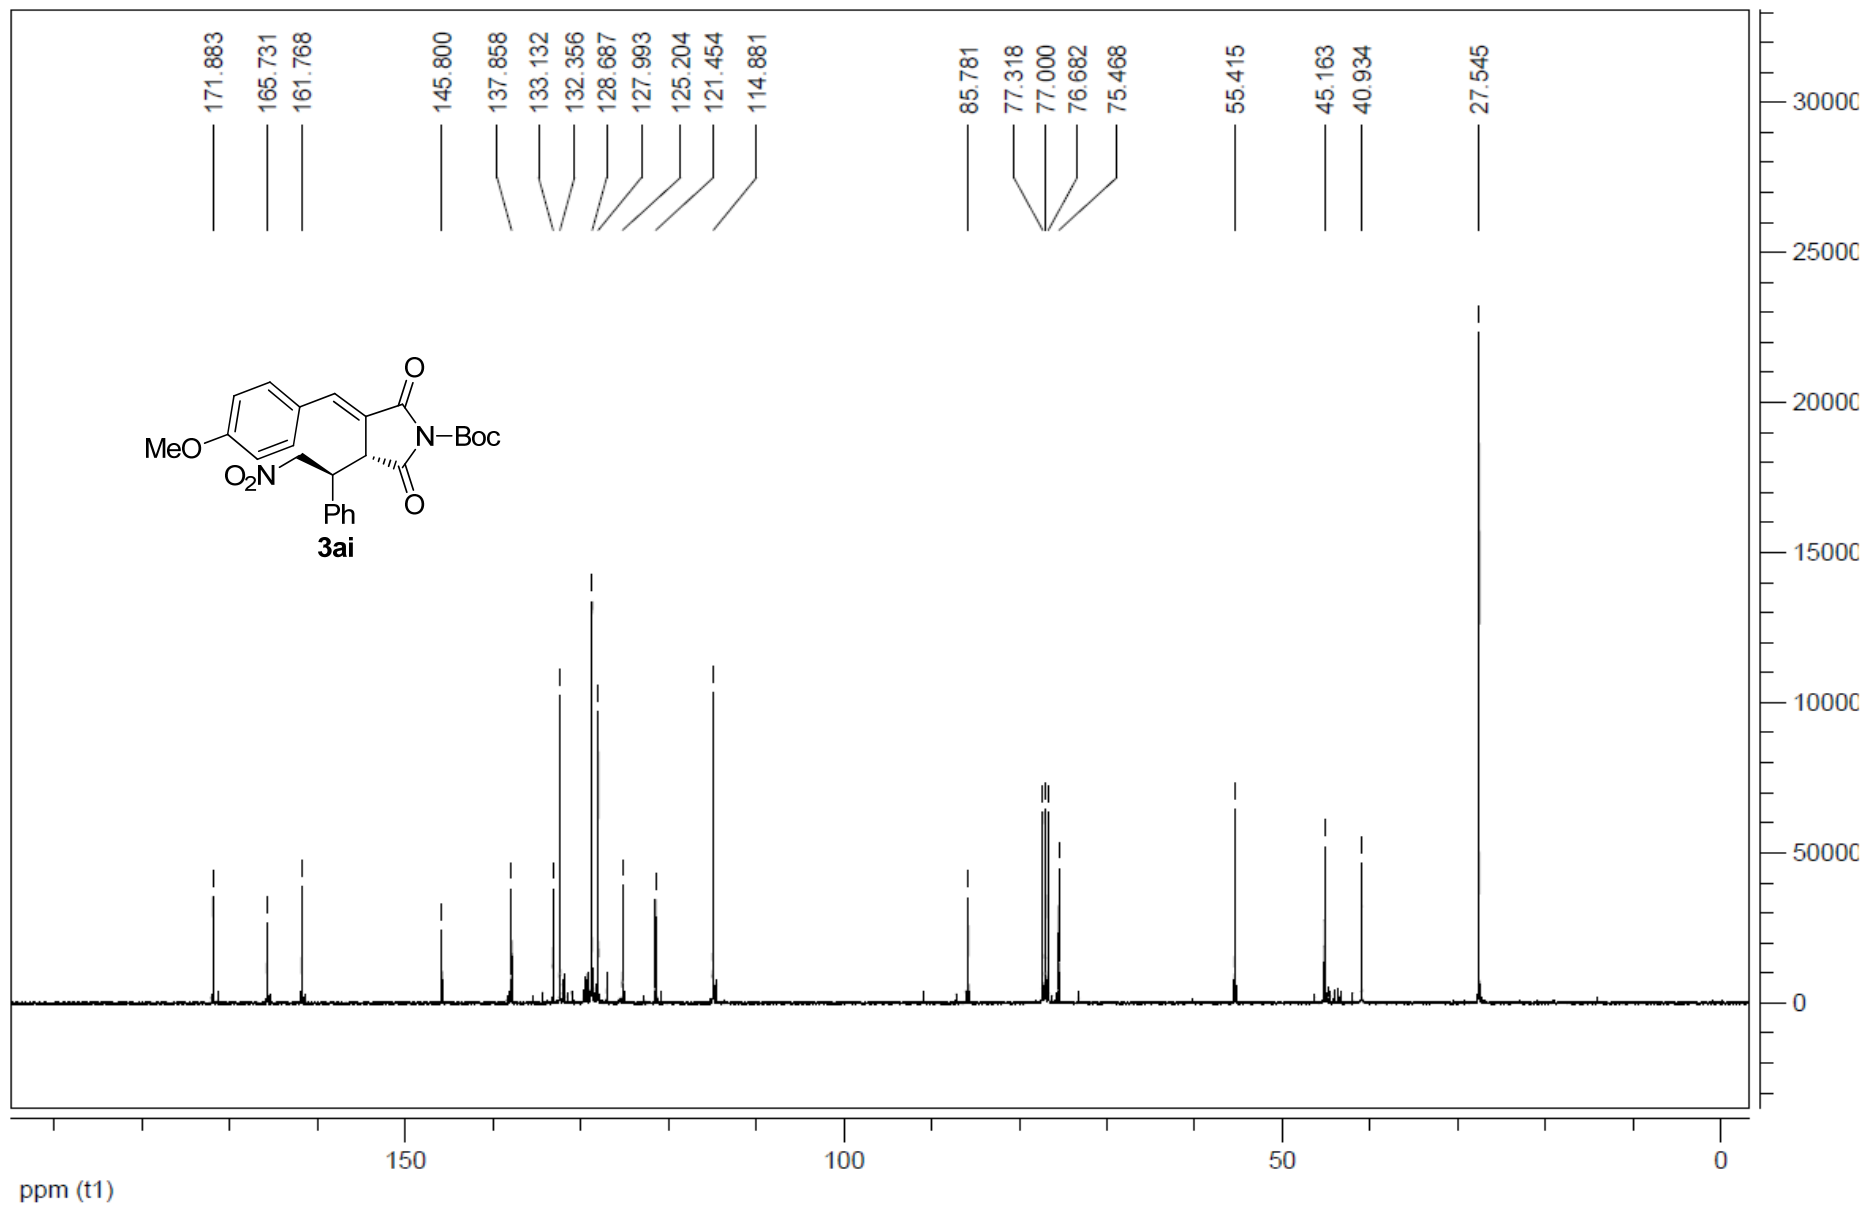



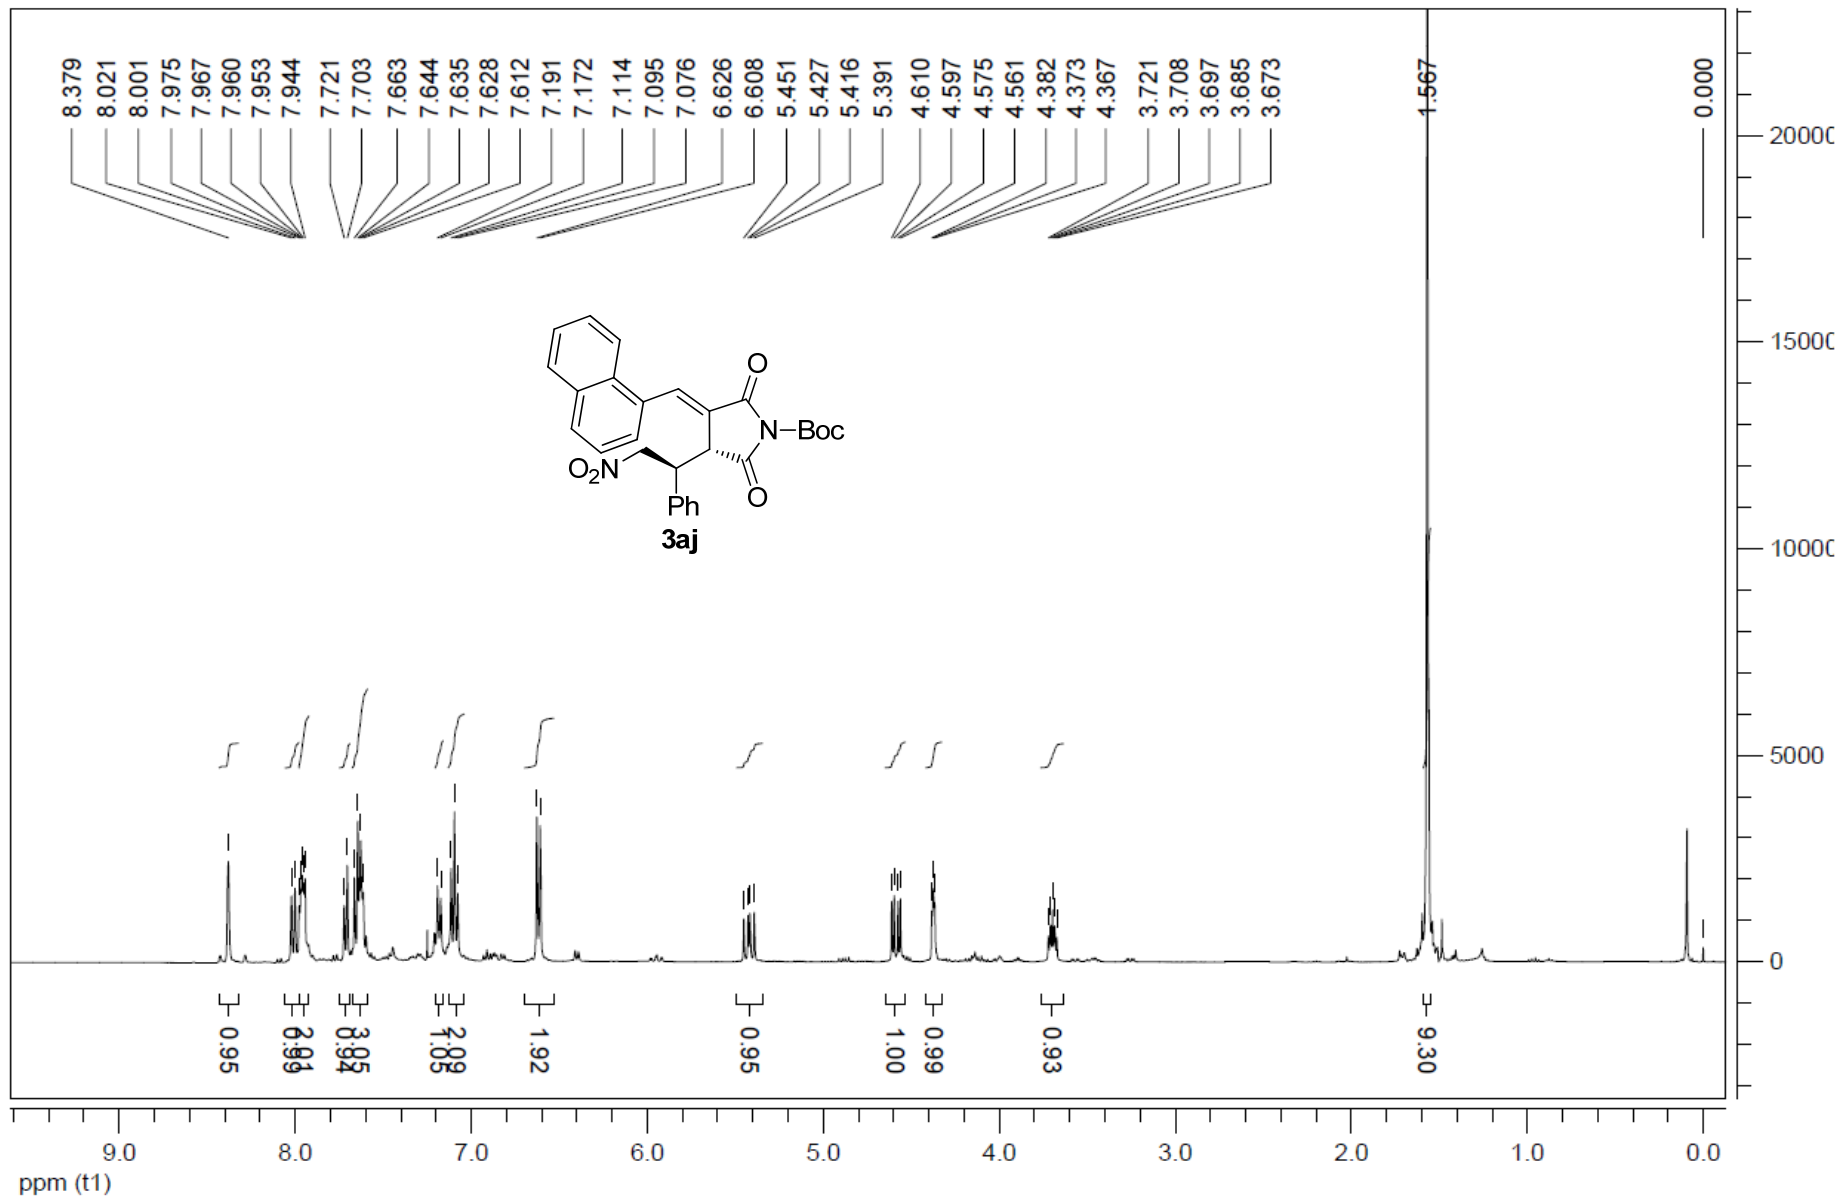

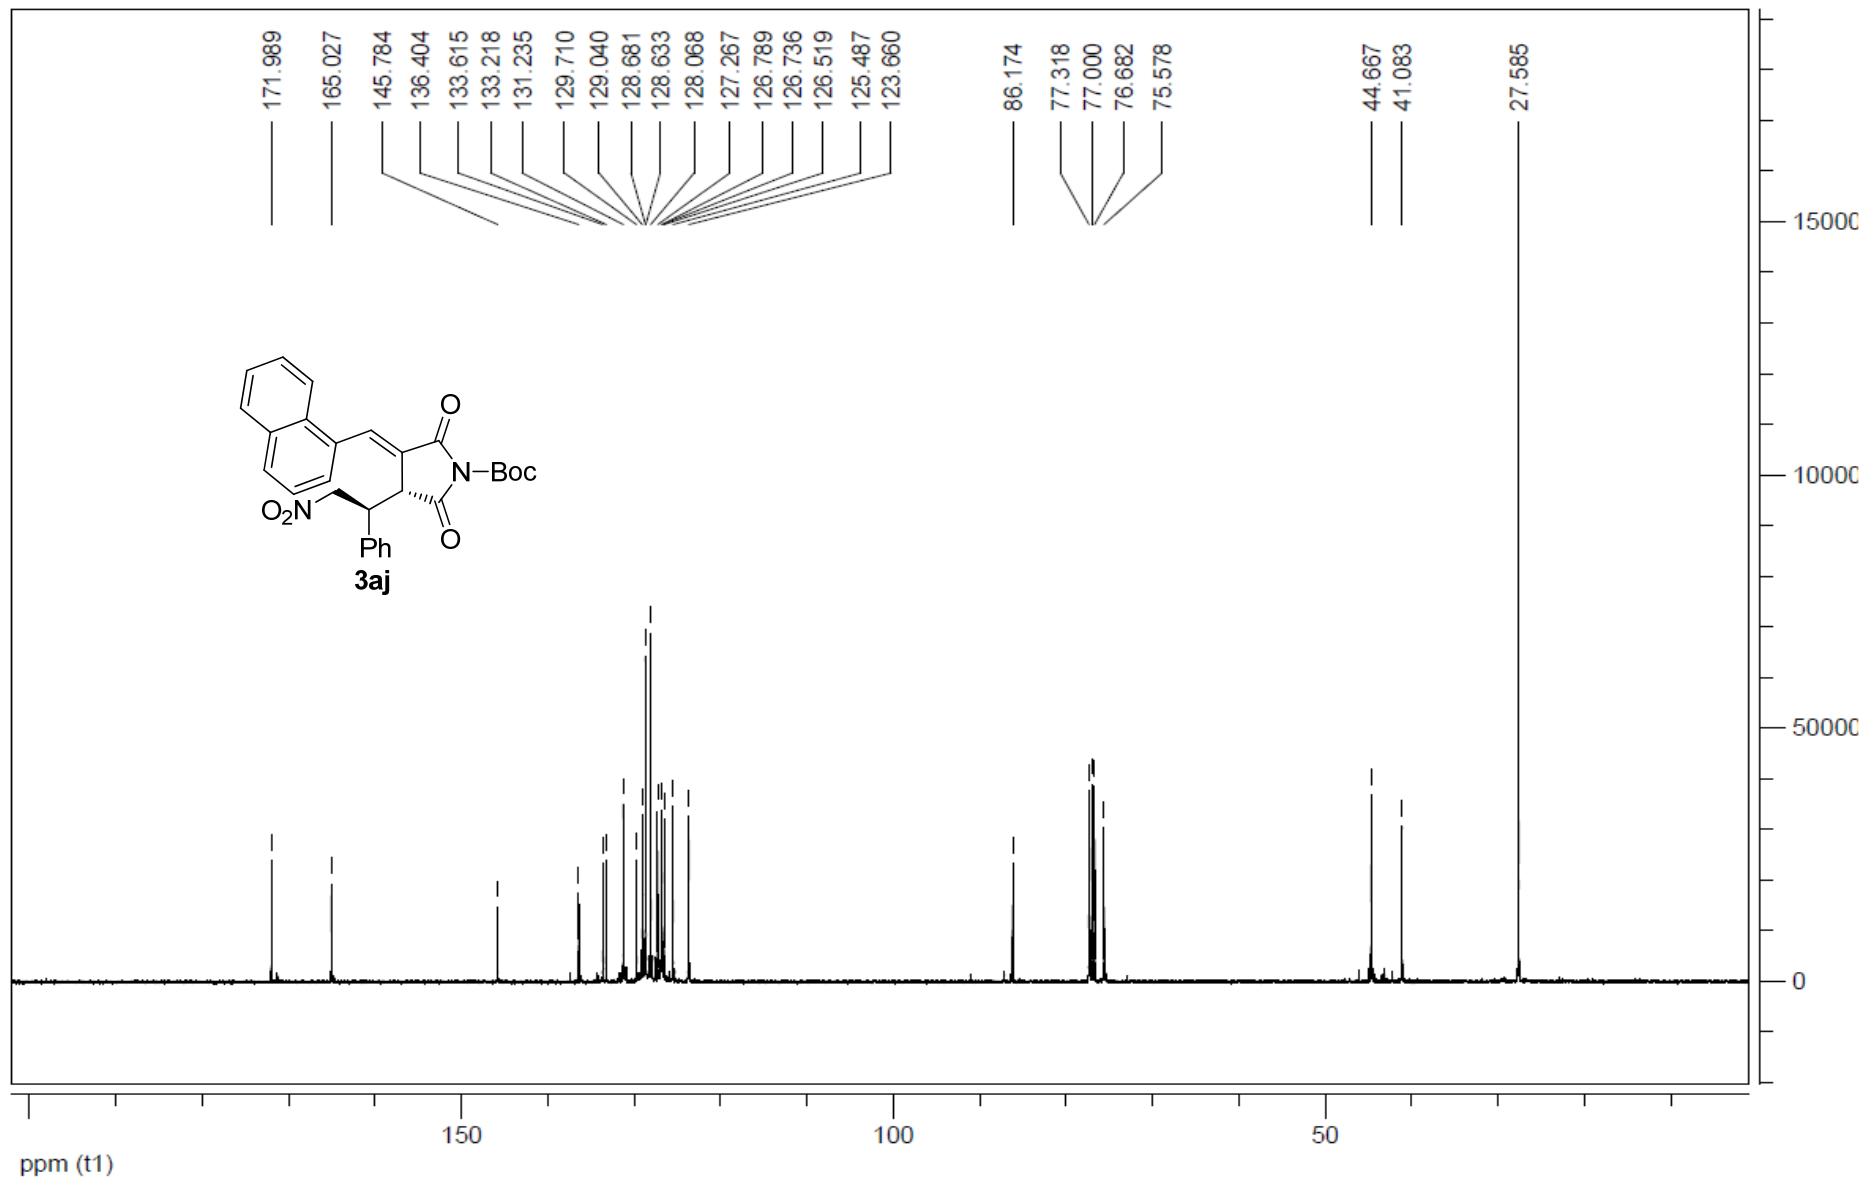

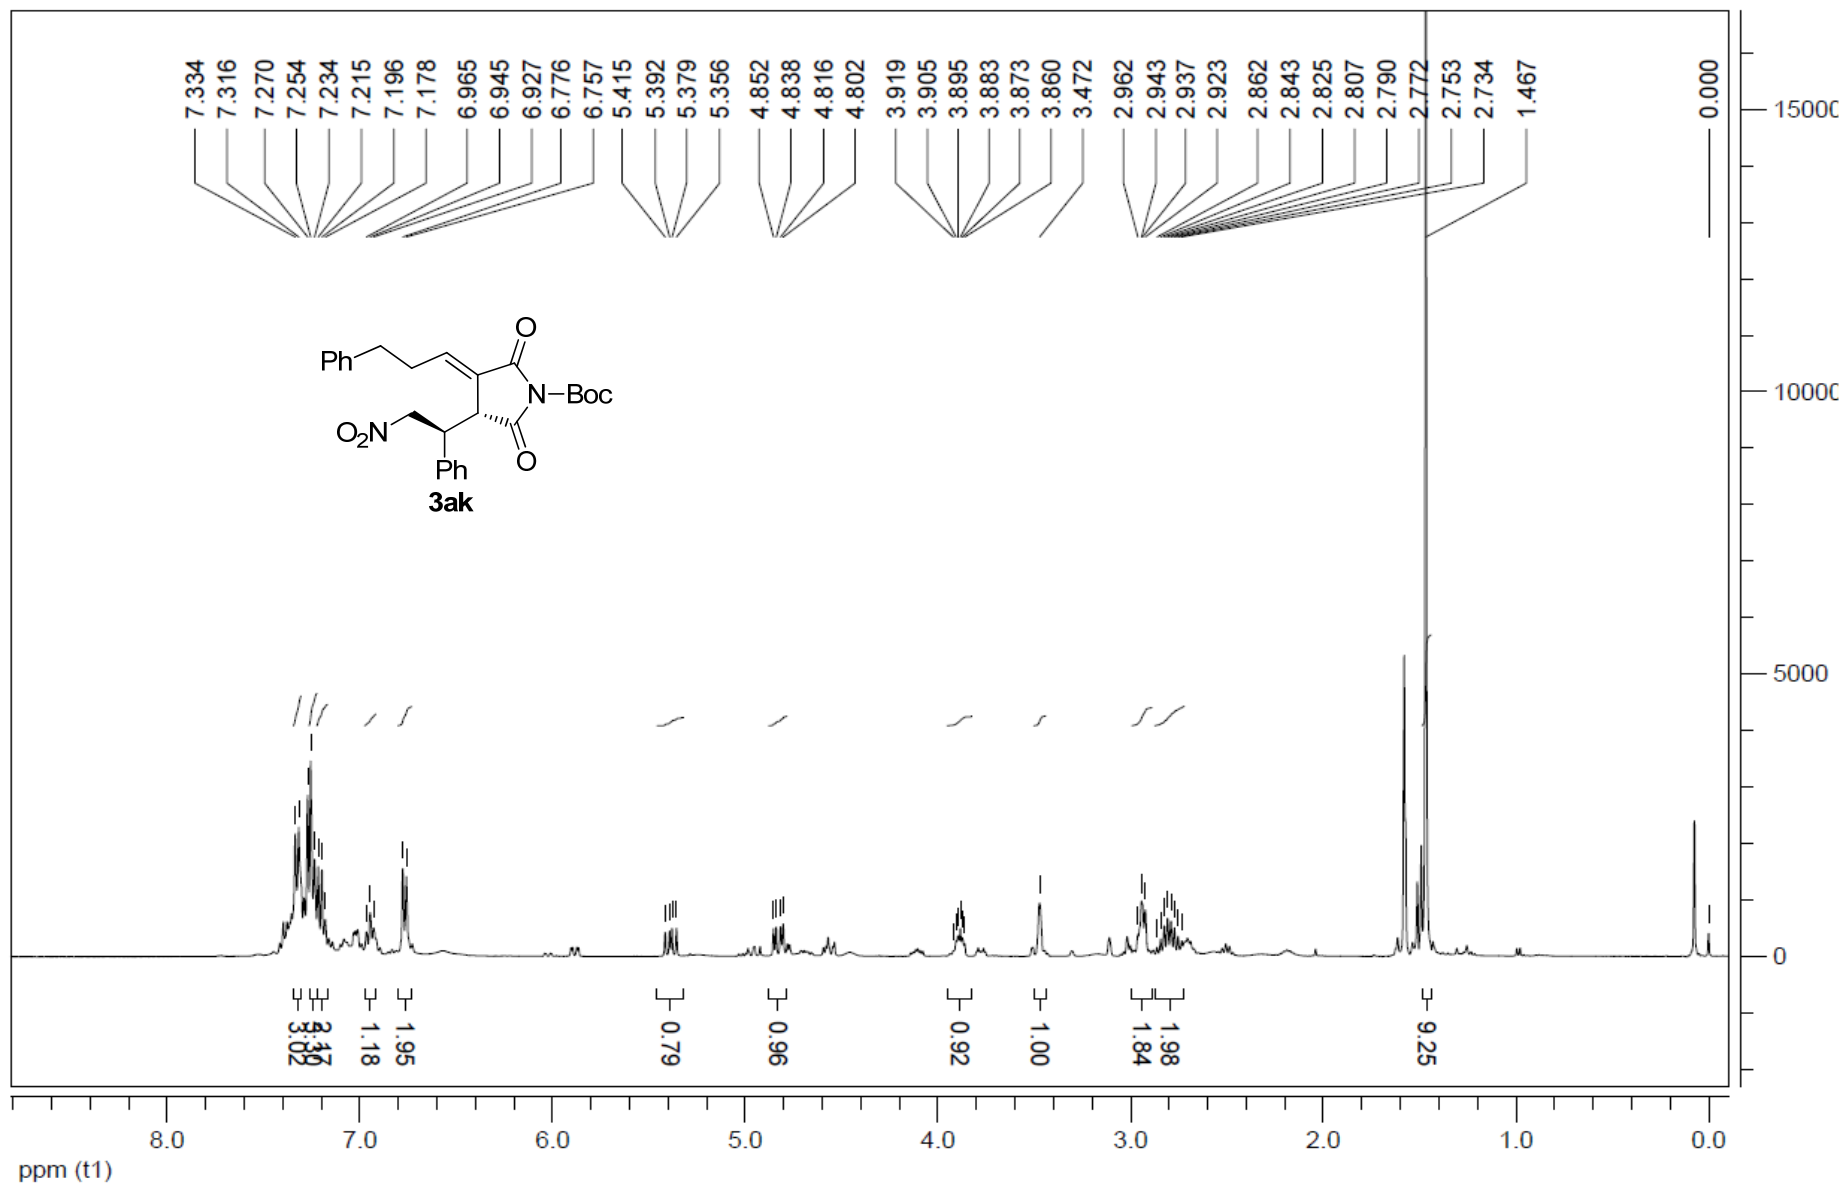

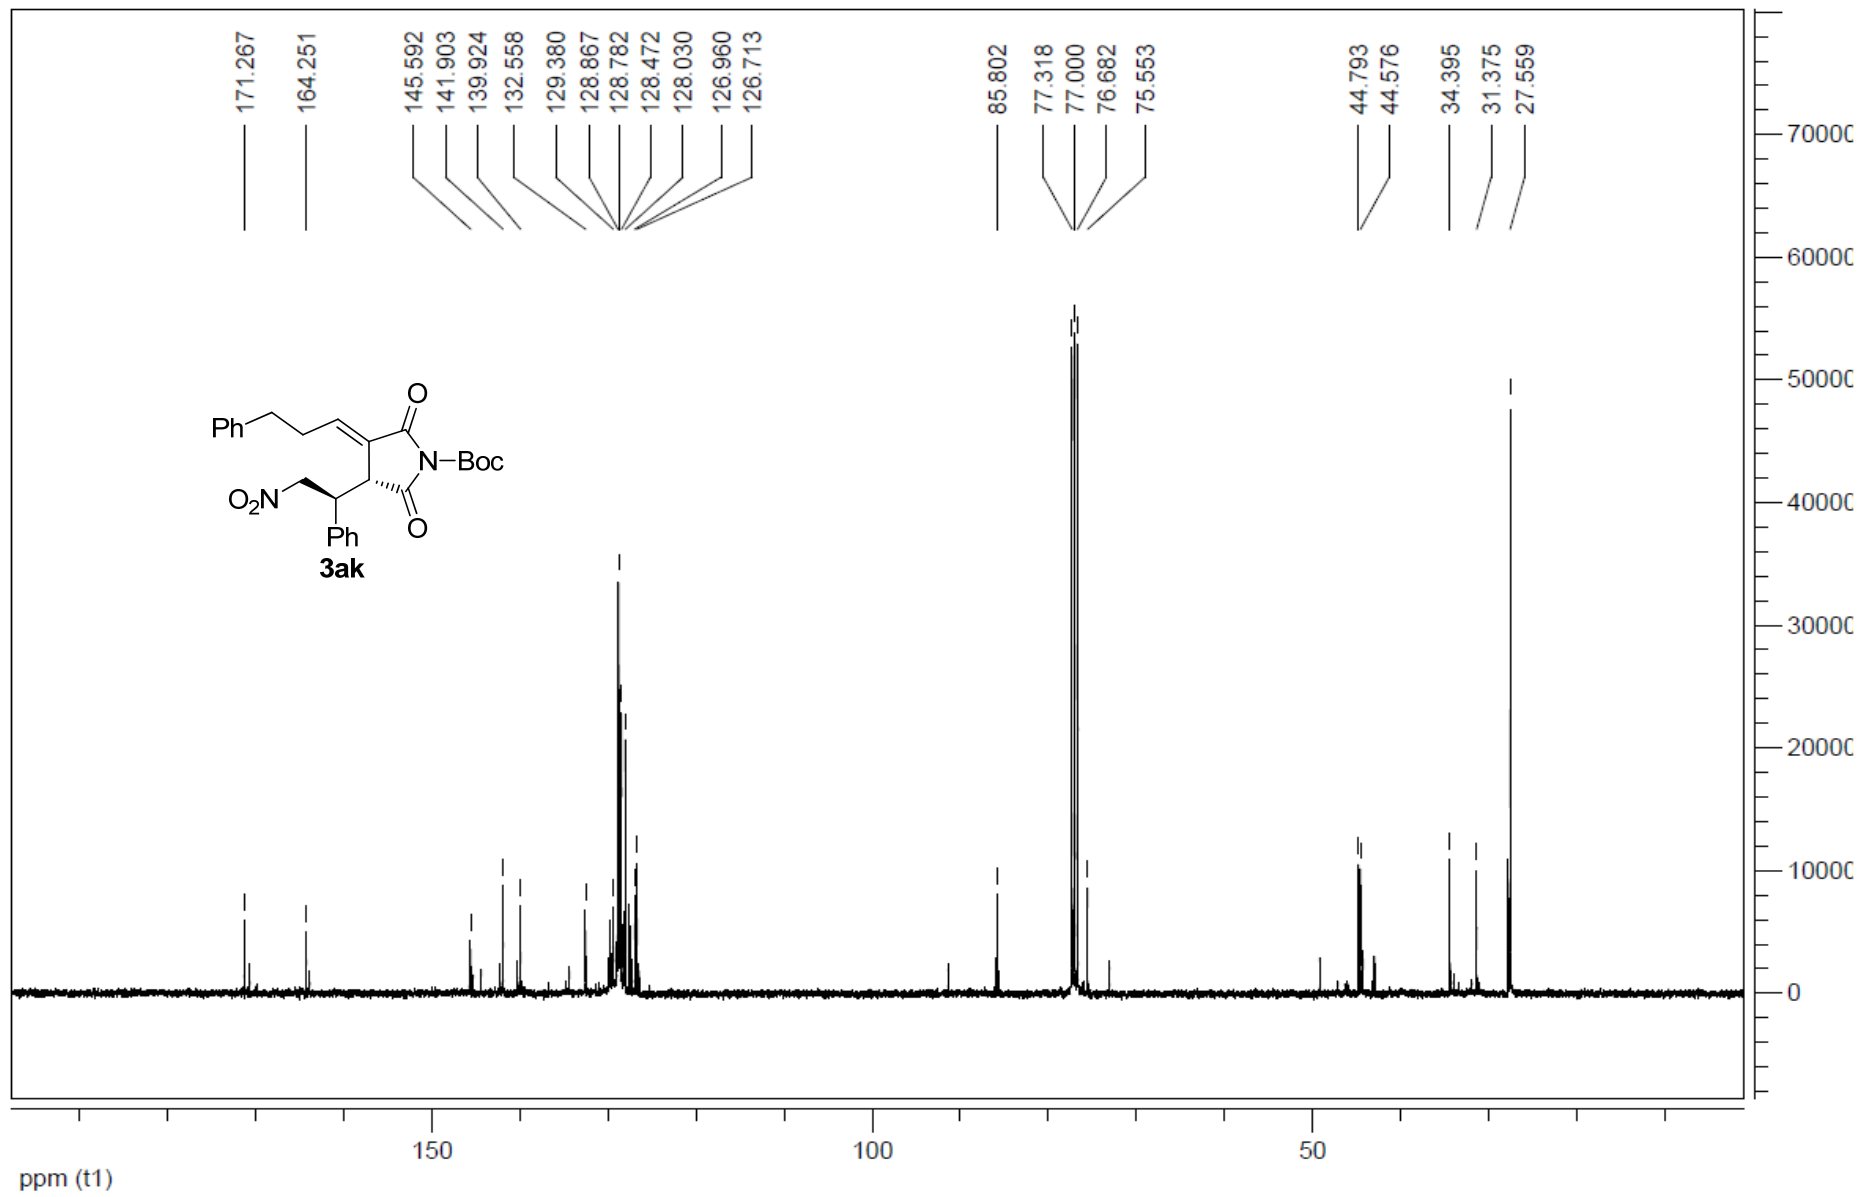

## Copies of HPLC chromatograms

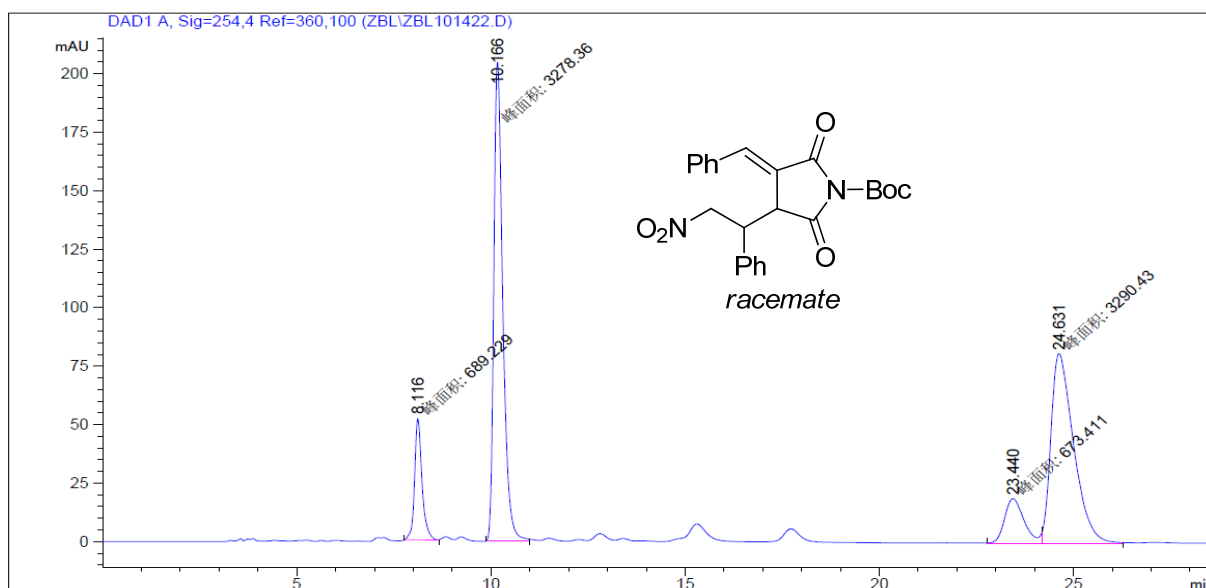

| Peak # | RetTime [min] | Type | Width [min] | Area [mAU*s] | Height [mAU] | Area %  |
|--------|---------------|------|-------------|--------------|--------------|---------|
| 1      | 8.116         | MM   | 0.2216      | 689.22876    | 51.83558     | 8.6898  |
| 2      | 10.166        | MM   | 0.2670      | 3278.36060   | 204.65494    | 41.3338 |
| 3      | 23.440        | MM   | 0.5876      | 673.41064    | 19.09912     | 8.4904  |
| 4      | 24.631        | MM   | 0.6769      | 3290.42944   | 81.01297     | 41.4860 |

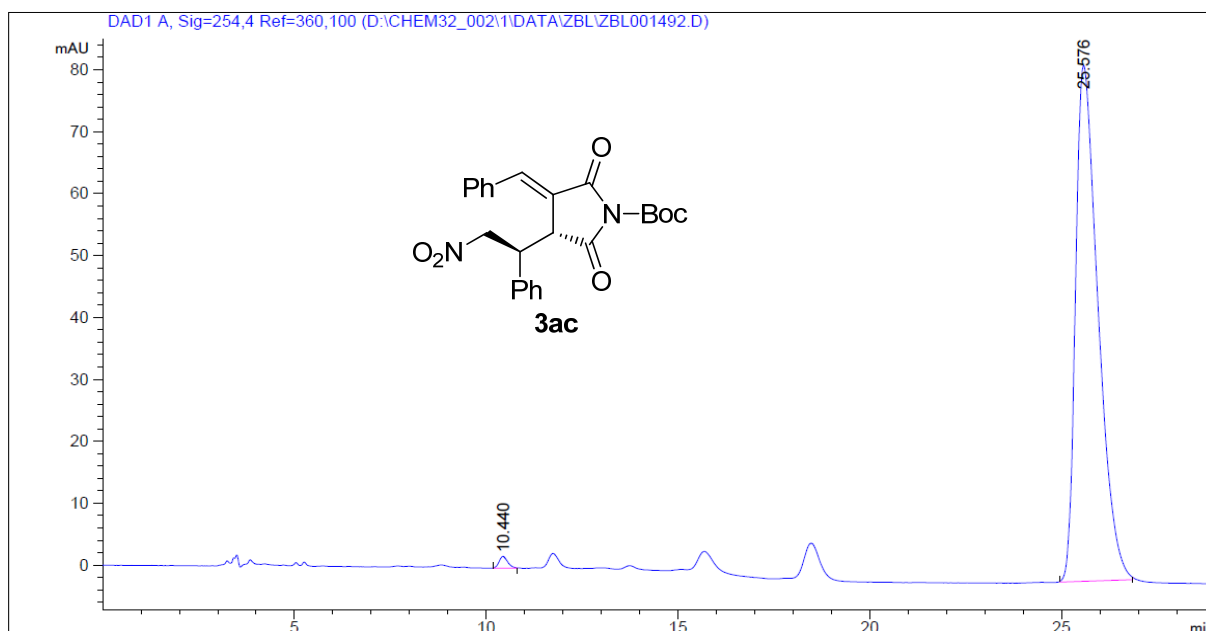

| Peak # | RetTime [min] | Type | Width [min] | Area [mAU*s] | Height [mAU] | Area %  |
|--------|---------------|------|-------------|--------------|--------------|---------|
| 1      | 10.440        | BB   | 0.2324      | 29.49535     | 1.90787      | 0.8630  |
| 2      | 25.576        | BB   | 0.6144      | 3388.21680   | 83.33169     | 99.1370 |

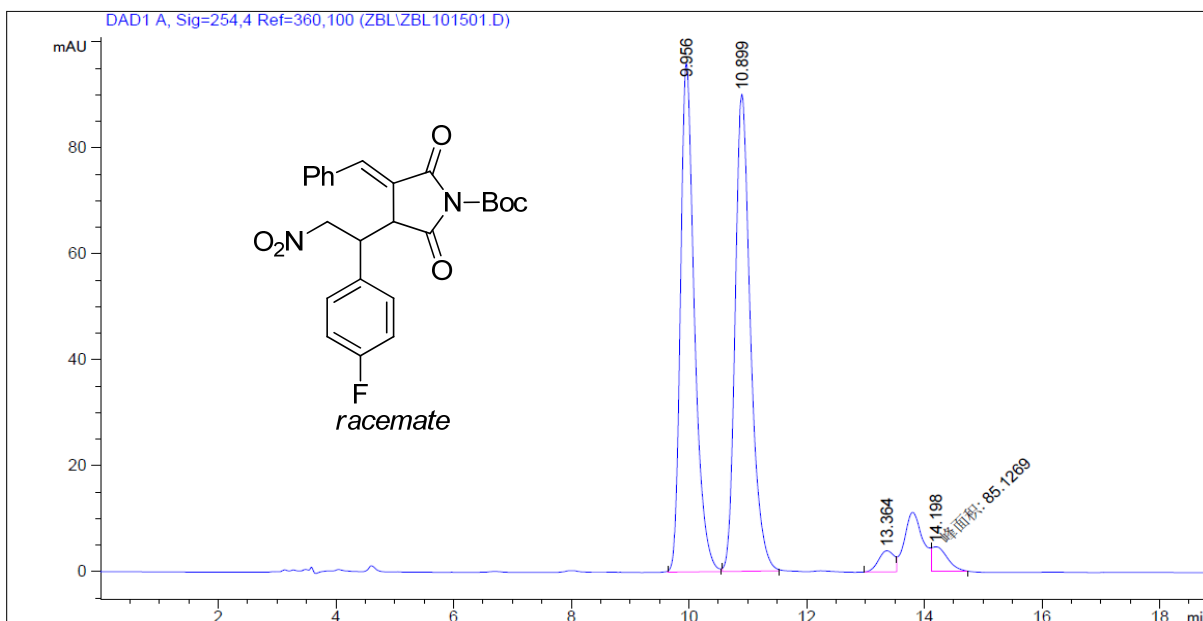

| Peak # | RetTime [min] | Type | Width [min] | Area [mAU*s] | Height [mAU] | Area %  |
|--------|---------------|------|-------------|--------------|--------------|---------|
| 1      | 9.956         | BB   | 0.2485      | 1585.36255   | 96.06881     | 46.9618 |
| 2      | 10.899        | BB   | 0.2733      | 1632.10388   | 90.10428     | 48.3464 |
| 3      | 13.364        | BV   | 0.2760      | 73.26394     | 3.99497      | 2.1702  |
| 4      | 14.198        | MM   | 0.3051      | 85.12688     | 4.65086      | 2.5216  |

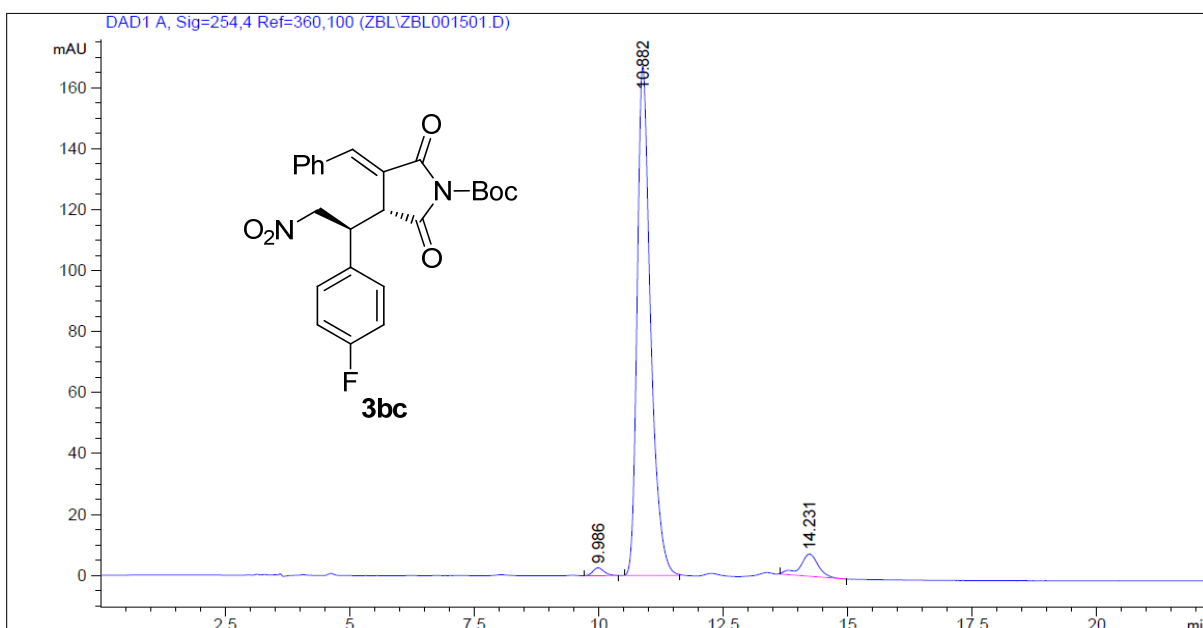

| Peak # | RetTime [min] | Type | Width [min] | Area [mAU*s] | Height [mAU] | Area %  |
|--------|---------------|------|-------------|--------------|--------------|---------|
| 1      | 9.986         | BB   | 0.2379      | 40.21817     | 2.57933      | 1.1940  |
| 2      | 10.882        | BB   | 0.2813      | 3143.86719   | 167.22809    | 93.3364 |
| 3      | 14.231        | BB   | 0.3736      | 184.23434    | 7.32202      | 5.4696  |

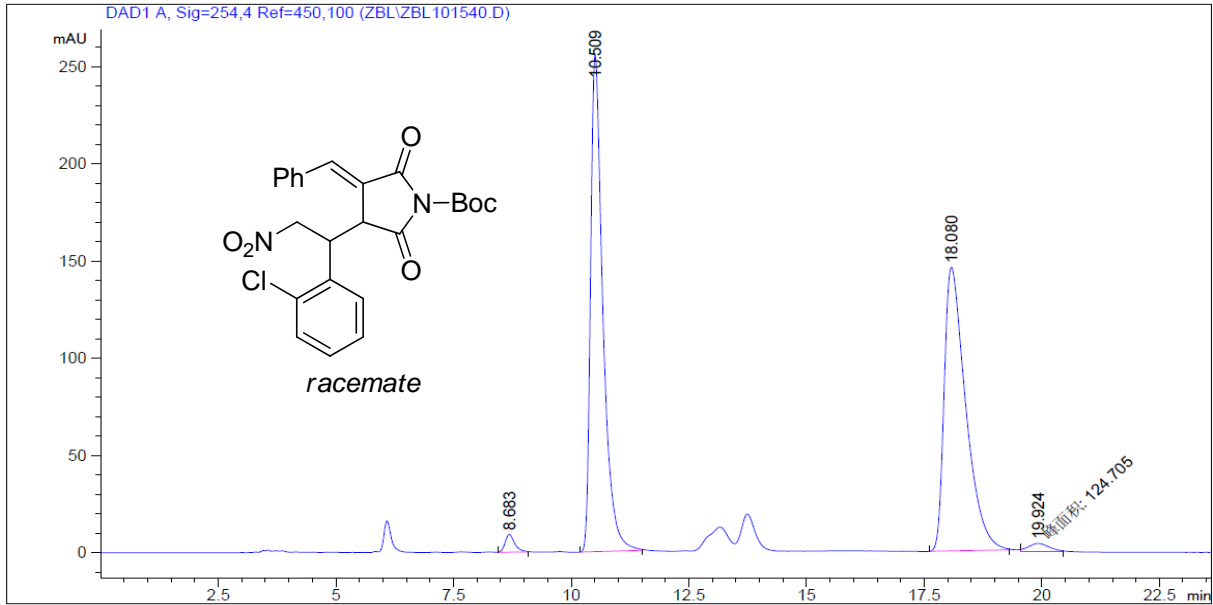

| Peak # | RetTime [min] | Type | Width [min] | Area [mAU*s] | Height [mAU] | Area %  |
|--------|---------------|------|-------------|--------------|--------------|---------|
| 1      | 8.683         | BB   | 0.2133      | 128.37733    | 9.06145      | 1.3455  |
| 2      | 10.509        | BB   | 0.2724      | 4651.82471   | 255.55843    | 48.7555 |
| 3      | 18.080        | BB   | 0.4766      | 4636.21191   | 145.96326    | 48.5919 |
| 4      | 19.924        | MM   | 0.5085      | 124.70516    | 4.08721      | 1.3070  |

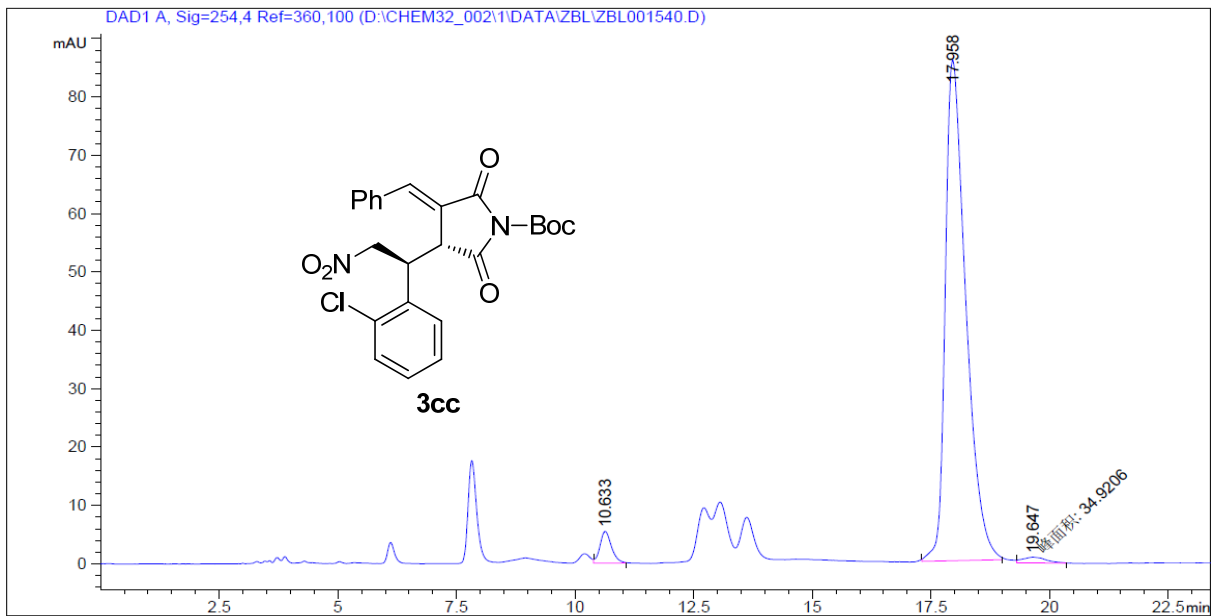

| Peak # | RetTime [min] | Type | Width [min] | Area [mAU*s] | Height [mAU] | Area %  |
|--------|---------------|------|-------------|--------------|--------------|---------|
| 1      | 10.633        | VB   | 0.2571      | 91.84529     | 5.43653      | 3.3896  |
| 2      | 17.958        | BB   | 0.4510      | 2582.87036   | 85.84174     | 95.3217 |
| 3      | 19.647        | MM   | 0.5799      | 34.92059     | 1.00365      | 1.2888  |

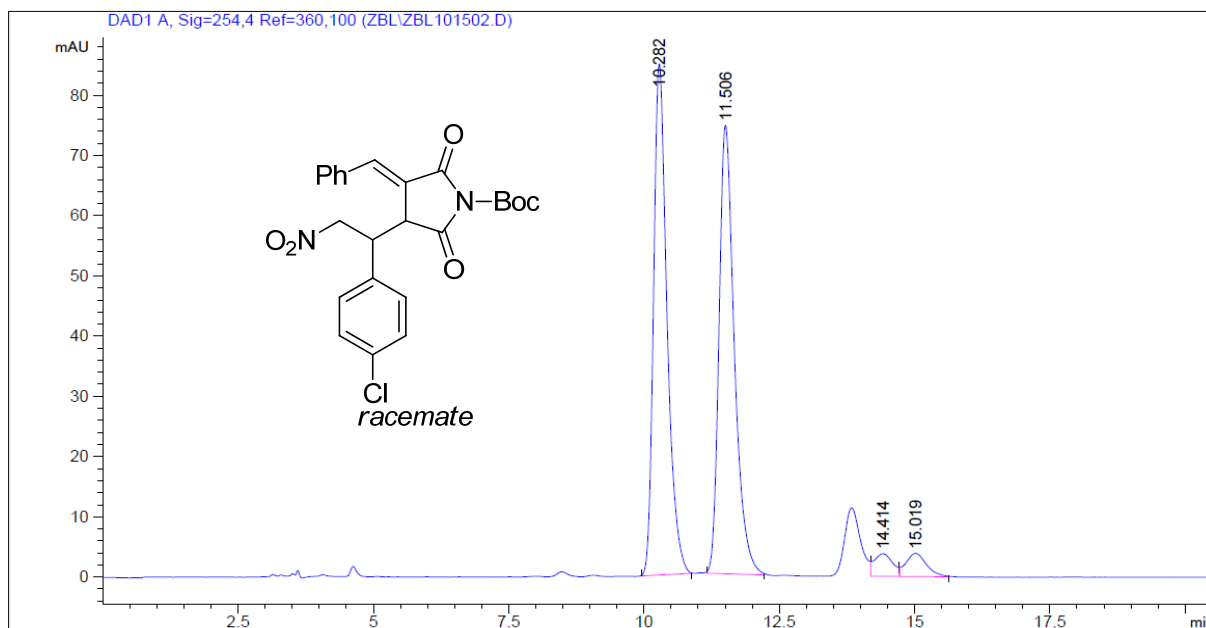

| Peak # | RetTime [min] | Type | Width [min] | Area [mAU*s] | Height [mAU] | Area %  |
|--------|---------------|------|-------------|--------------|--------------|---------|
| 1      | 10.282        | BB   | 0.2620      | 1469.66968   | 84.89933     | 47.0054 |
| 2      | 11.506        | BB   | 0.2975      | 1465.36340   | 74.49806     | 46.8677 |
| 3      | 14.414        | VV   | 0.3428      | 89.05001     | 3.75277      | 2.8481  |
| 4      | 15.019        | VB   | 0.3842      | 102.51240    | 3.85520      | 3.2787  |

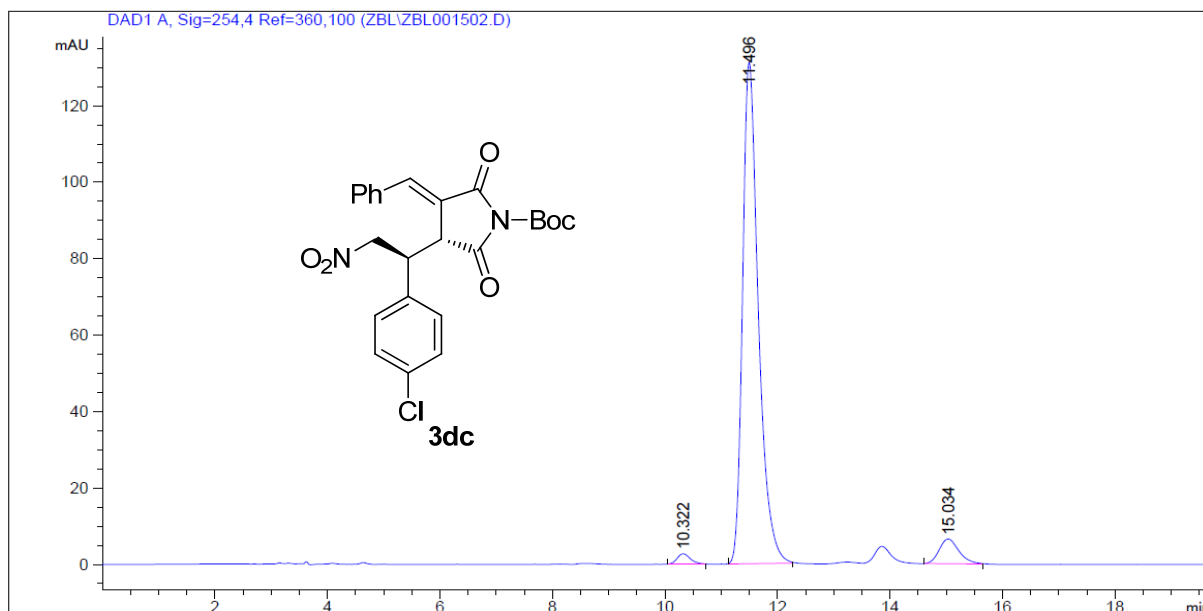

| Peak # | RetTime [min] | Type | Width [min] | Area [mAU*s] | Height [mAU] | Area %  |
|--------|---------------|------|-------------|--------------|--------------|---------|
| 1      | 10.322        | BB   | 0.2512      | 44.99034     | 2.74523      | 1.6269  |
| 2      | 11.496        | BB   | 0.2937      | 2562.13452   | 131.27029    | 92.6490 |
| 3      | 15.034        | BB   | 0.3669      | 158.29454    | 6.48314      | 5.7241  |



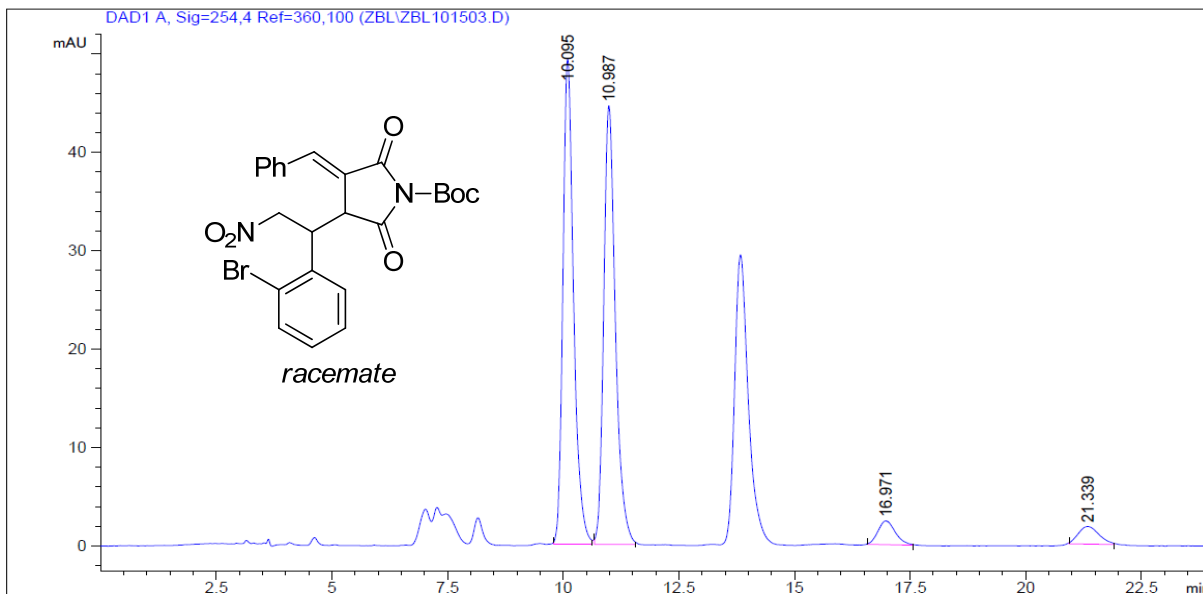

| Peak # | RetTime [min] | Type | Width [min] | Area [mAU*s] | Height [mAU] | Area %  |
|--------|---------------|------|-------------|--------------|--------------|---------|
| 1      | 10.095        | BB   | 0.2434      | 792.62909    | 49.34098     | 46.7753 |
| 2      | 10.987        | BB   | 0.2649      | 783.50098    | 44.60143     | 46.2366 |
| 3      | 16.971        | BB   | 0.3710      | 62.77668     | 2.41737      | 3.7046  |
| 4      | 21.339        | BB   | 0.3916      | 55.63958     | 1.79504      | 3.2835  |

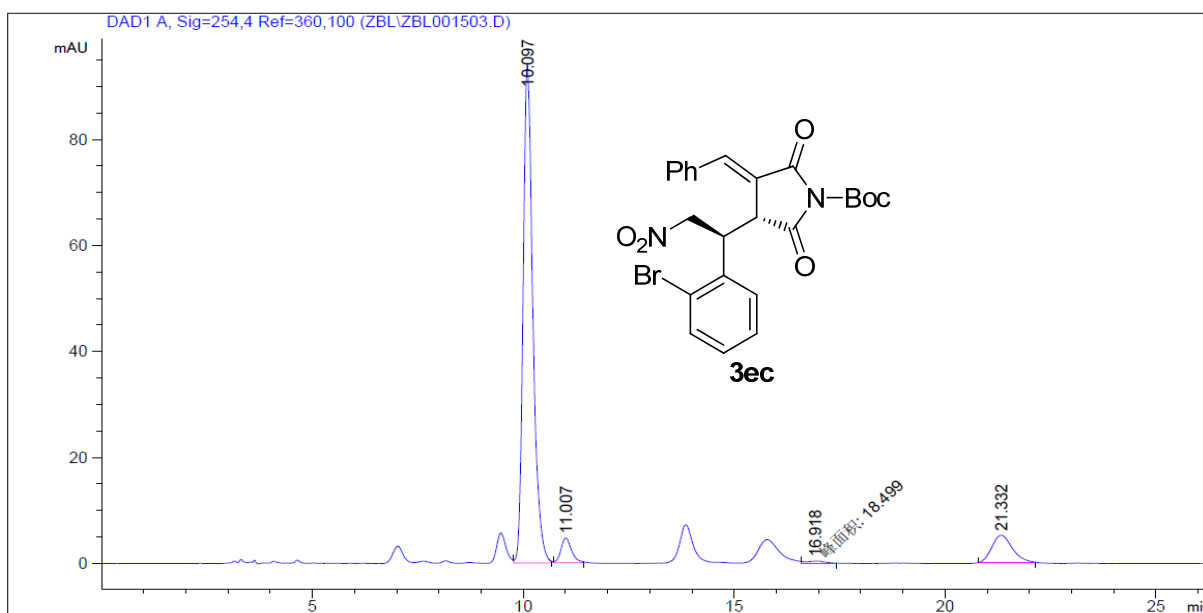

| Peak # | RetTime [min] | Type | Width [min] | Area [mAU*s] | Height [mAU] | Area %  |
|--------|---------------|------|-------------|--------------|--------------|---------|
| 1      | 10.097        | VB   | 0.2432      | 1510.37170   | 94.14999     | 84.4600 |
| 2      | 11.007        | BB   | 0.2576      | 81.03400     | 4.68874      | 4.5314  |
| 3      | 16.918        | MM   | 0.5985      | 18.49899     | 5.15118e-1   | 1.0345  |
| 4      | 21.332        | BB   | 0.4329      | 178.36305    | 5.21596      | 9.9741  |

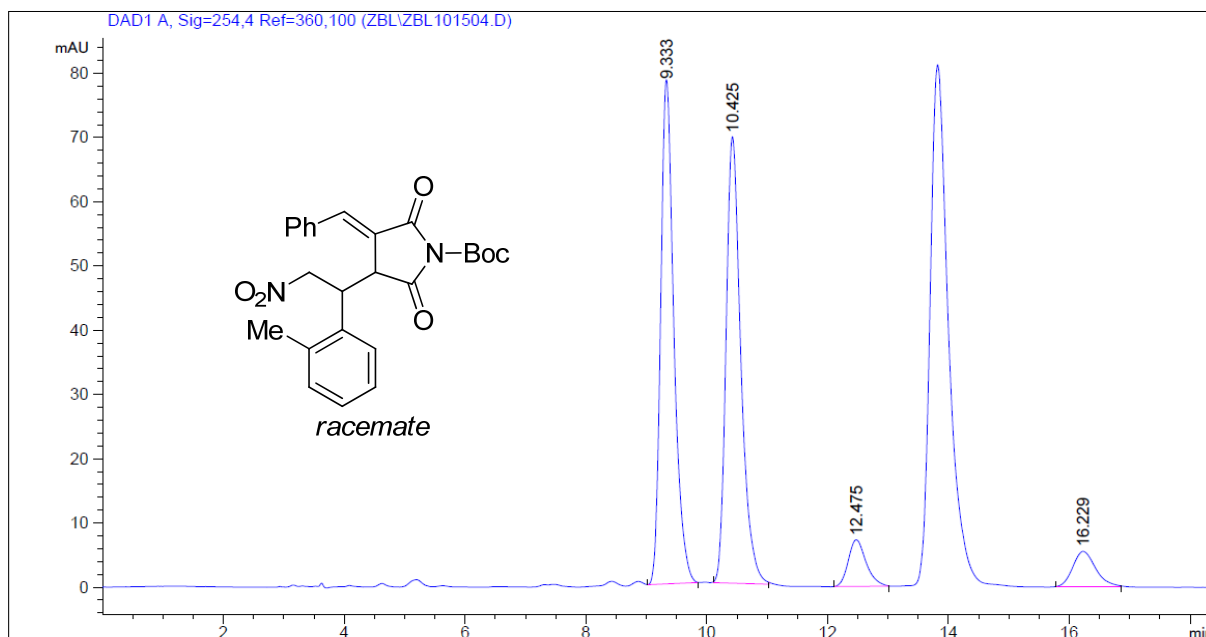

| Peak # | RetTime [min] | Type | Width [min] | Area [mAU*s] | Height [mAU] | Area %  |
|--------|---------------|------|-------------|--------------|--------------|---------|
| 1      | 9.333         | VB   | 0.2307      | 1188.94861   | 78.50717     | 44.5744 |
| 2      | 10.425        | BB   | 0.2569      | 1185.08093   | 69.50342     | 44.4294 |
| 3      | 12.475        | BB   | 0.3073      | 148.92793    | 7.26021      | 5.5834  |
| 4      | 16.229        | BB   | 0.3957      | 144.37941    | 5.51026      | 5.4129  |

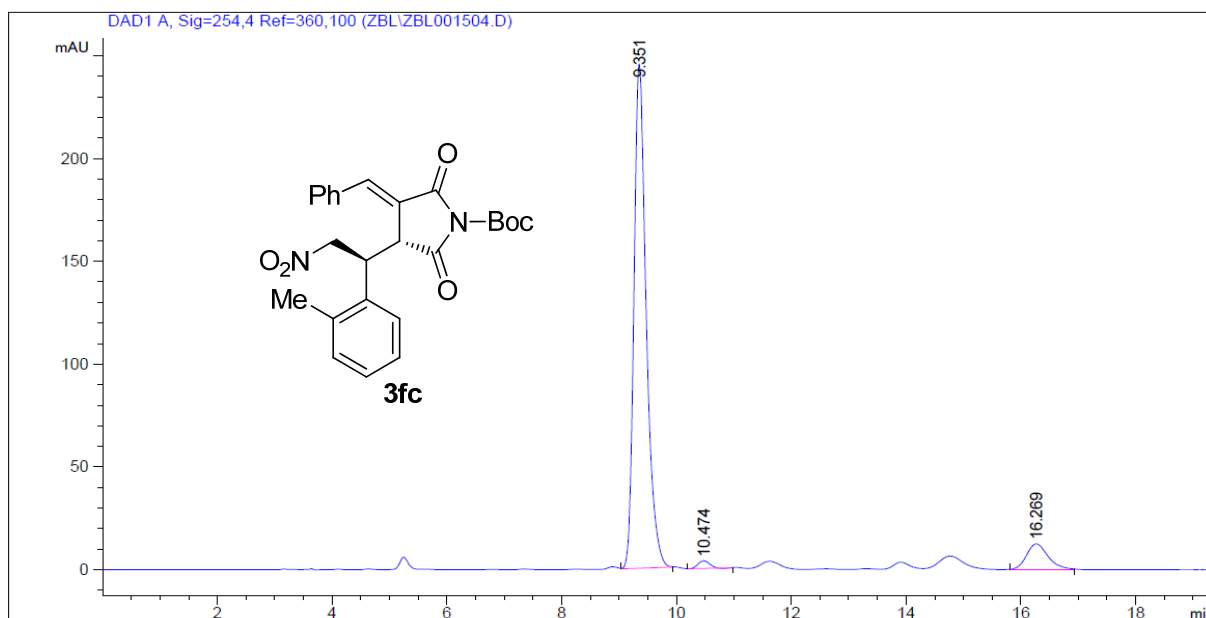

| Peak # | RetTime [min] | Type | Width [min] | Area [mAU*s] | Height [mAU] | Area %  |
|--------|---------------|------|-------------|--------------|--------------|---------|
| 1      | 9.351         | VB   | 0.2252      | 3642.12769   | 245.26823    | 90.6048 |
| 2      | 10.474        | BB   | 0.2207      | 51.05826     | 3.70689      | 1.2702  |
| 3      | 16.269        | BB   | 0.3943      | 326.61035    | 12.43892     | 8.1250  |

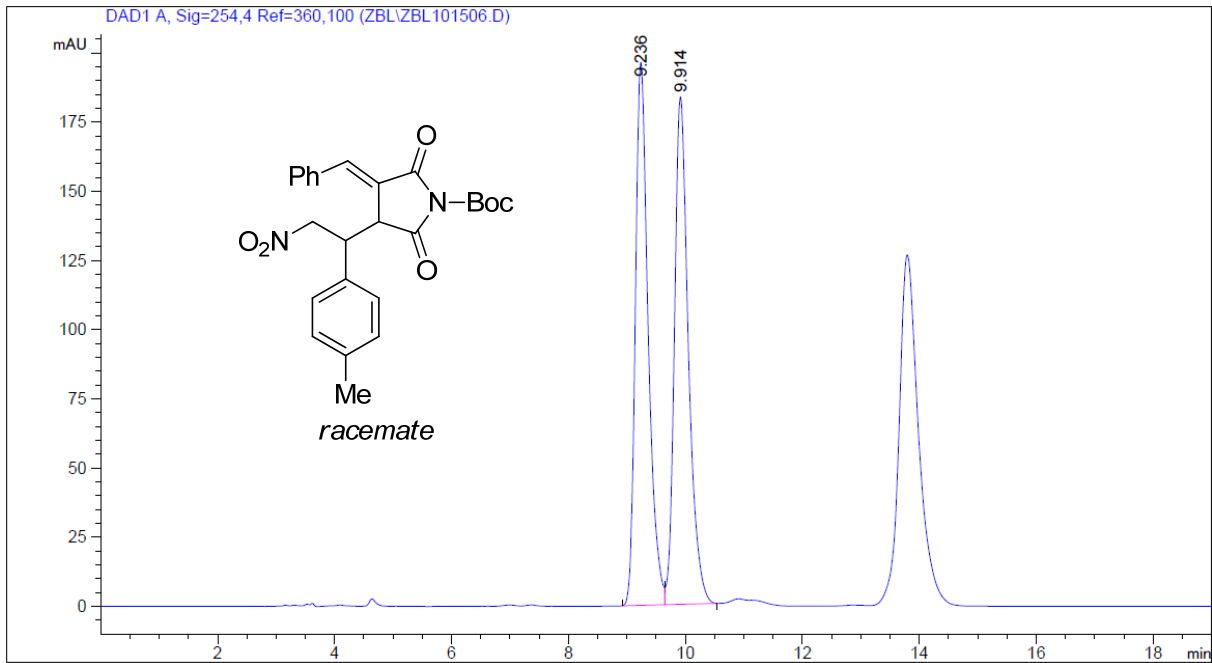

| Peak # | RetTime [min] | Type | Width [min] | Area [mAU*s] | Height [mAU] | Area %  |
|--------|---------------|------|-------------|--------------|--------------|---------|
| 1      | 9.236         | BV   | 0.2299      | 2992.91333   | 196.32695    | 49.6218 |
| 2      | 9.914         | VB   | 0.2493      | 3038.52930   | 183.34857    | 50.3782 |

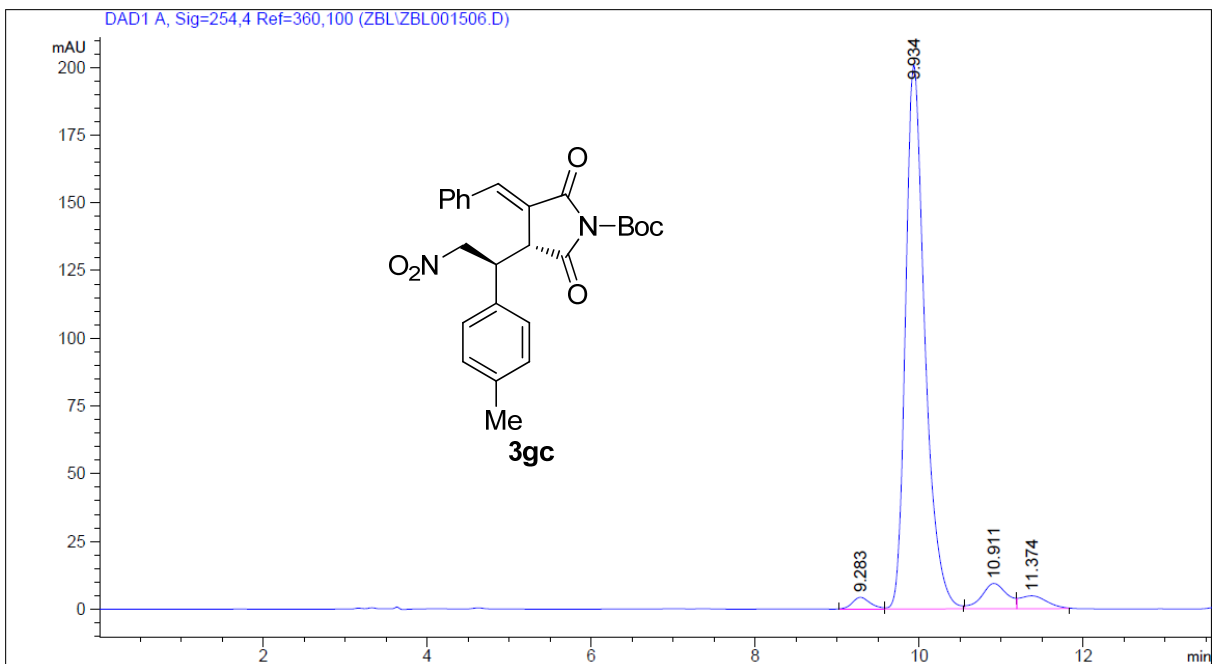

| Peak # | RetTime [min] | Type | Width [min] | Area [mAU*s] | Height [mAU] | Area %  |
|--------|---------------|------|-------------|--------------|--------------|---------|
| 1      | 9.283         | BV   | 0.2279      | 64.03785     | 4.29580      | 1.7429  |
| 2      | 9.934         | VB   | 0.2477      | 3300.18481   | 200.83203    | 89.8217 |
| 3      | 10.911        | BV   | 0.3191      | 201.03455    | 9.33874      | 5.4716  |
| 4      | 11.374        | VB   | 0.3361      | 108.89336    | 4.73830      | 2.9638  |

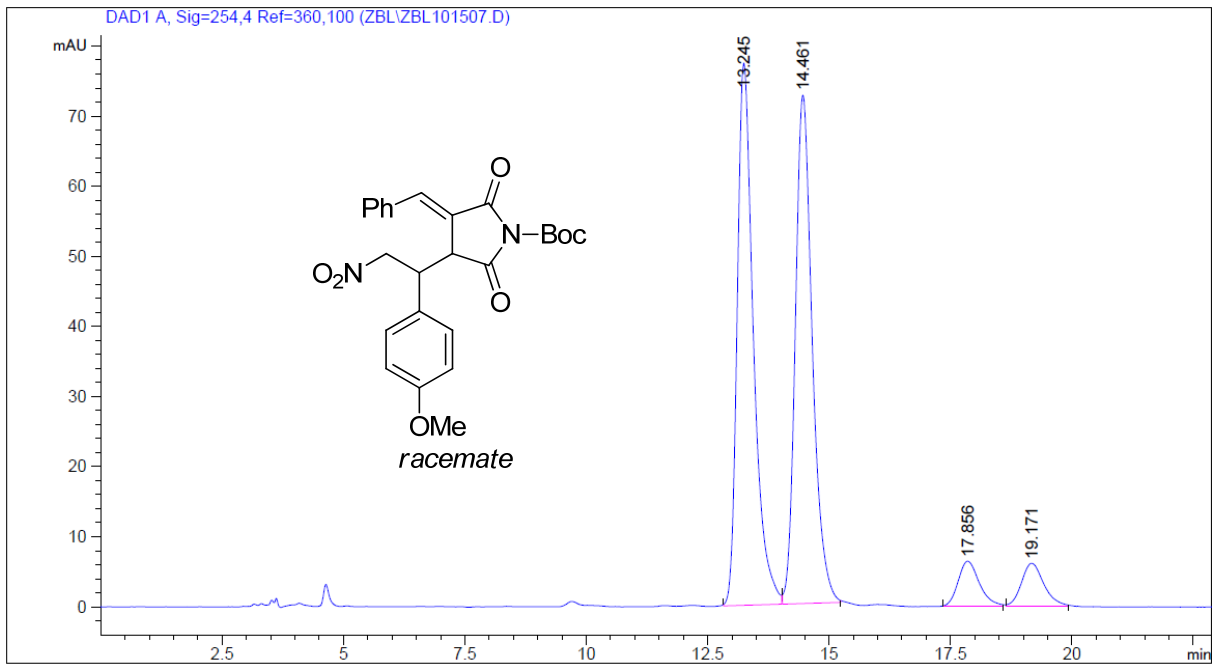

| Peak # | RetTime [min] | Type | Width [min] | Area [mAU*s] | Height [mAU] | Area %  |
|--------|---------------|------|-------------|--------------|--------------|---------|
| 1      | 13.245        | BB   | 0.3488      | 1795.98474   | 77.36314     | 45.4954 |
| 2      | 14.461        | BB   | 0.3699      | 1764.43591   | 72.51273     | 44.6962 |
| 3      | 17.856        | BB   | 0.4434      | 193.14354    | 6.41271      | 4.8927  |
| 4      | 19.171        | BB   | 0.4792      | 194.05678    | 6.09883      | 4.9158  |

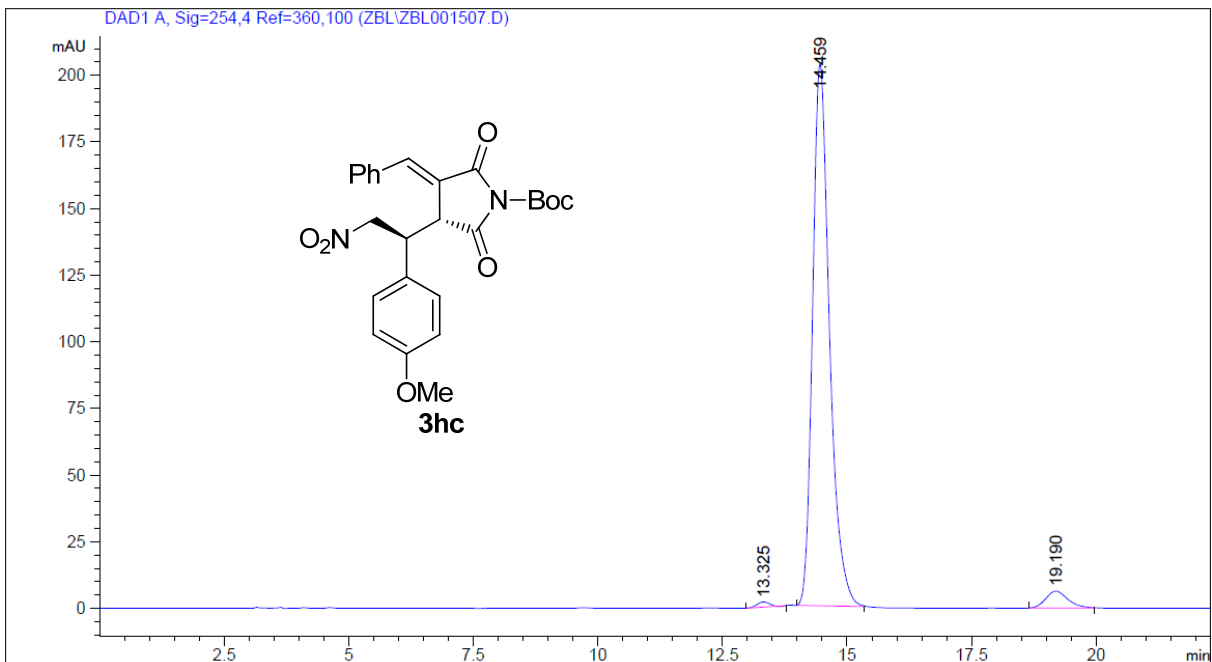

| Peak # | RetTime [min] | Type | Width [min] | Area [mAU*s] | Height [mAU] | Area %  |
|--------|---------------|------|-------------|--------------|--------------|---------|
| 1      | 13.325        | BB   | 0.2443      | 31.22659     | 1.91409      | 0.6221  |
| 2      | 14.459        | BB   | 0.3570      | 4790.84131   | 203.24774    | 95.4424 |
| 3      | 19.190        | BB   | 0.4509      | 197.54945    | 6.35099      | 3.9355  |

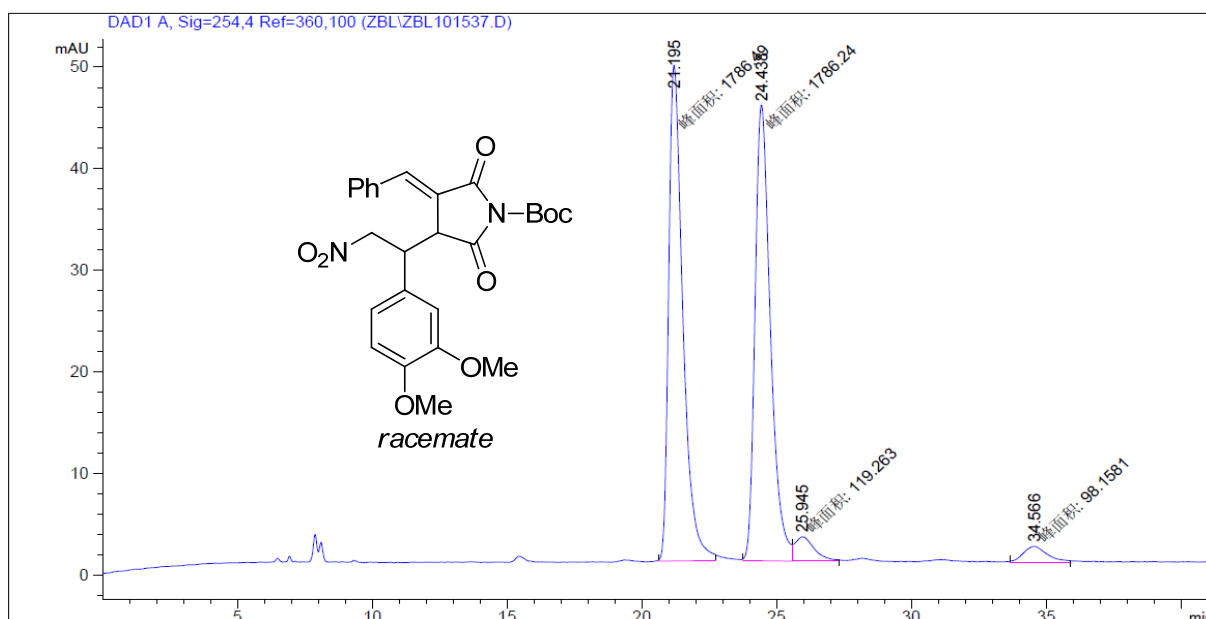

| Peak # | RetTime [min] | Type | Width [min] | Area [mAU*s] | Height [mAU] | Area %  |
|--------|---------------|------|-------------|--------------|--------------|---------|
| 1      | 21.195        | MM   | 0.6099      | 1786.48975   | 48.81981     | 47.1351 |
| 2      | 24.438        | MM   | 0.6637      | 1786.23779   | 44.85478     | 47.1284 |
| 3      | 25.945        | MM   | 0.8282      | 119.26338    | 2.40000      | 3.1467  |
| 4      | 34.566        | MM   | 1.0415      | 98.15815     | 1.57077      | 2.5898  |

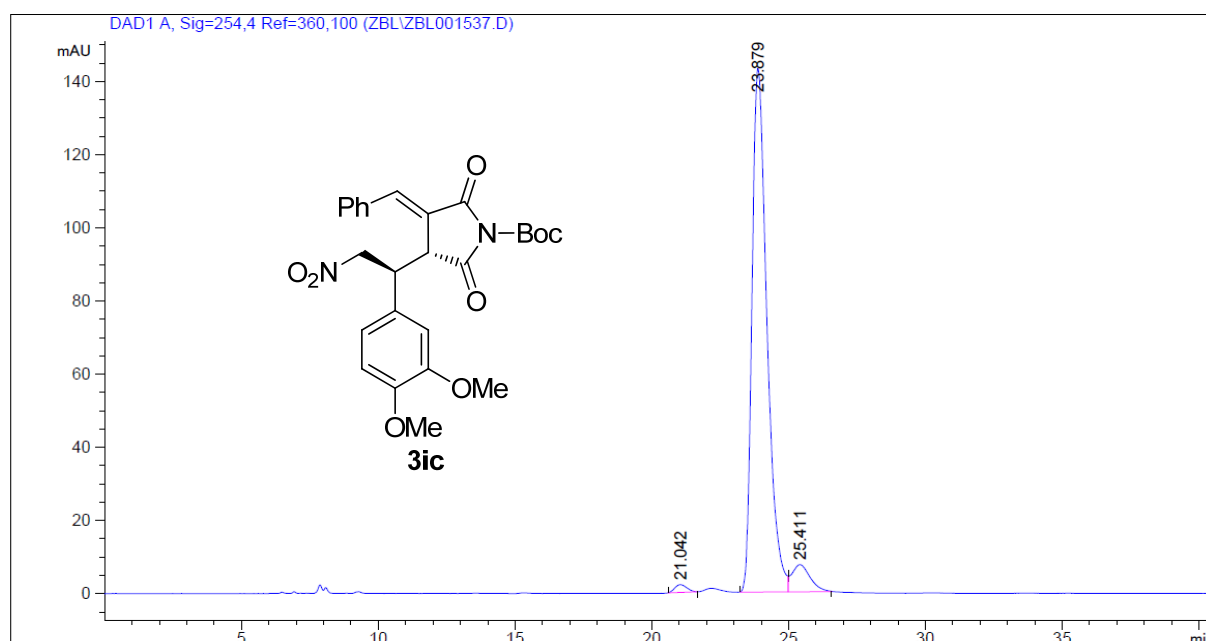

| Peak # | RetTime [min] | Type | Width [min] | Area [mAU*s] | Height [mAU] | Area %  |
|--------|---------------|------|-------------|--------------|--------------|---------|
| 1      | 21.042        | BB   | 0.3849      | 65.25977     | 2.13342      | 1.1132  |
| 2      | 23.879        | BB   | 0.5837      | 5448.54102   | 143.25677    | 92.9375 |
| 3      | 25.411        | BB   | 0.6059      | 348.78741    | 7.45382      | 5.9494  |

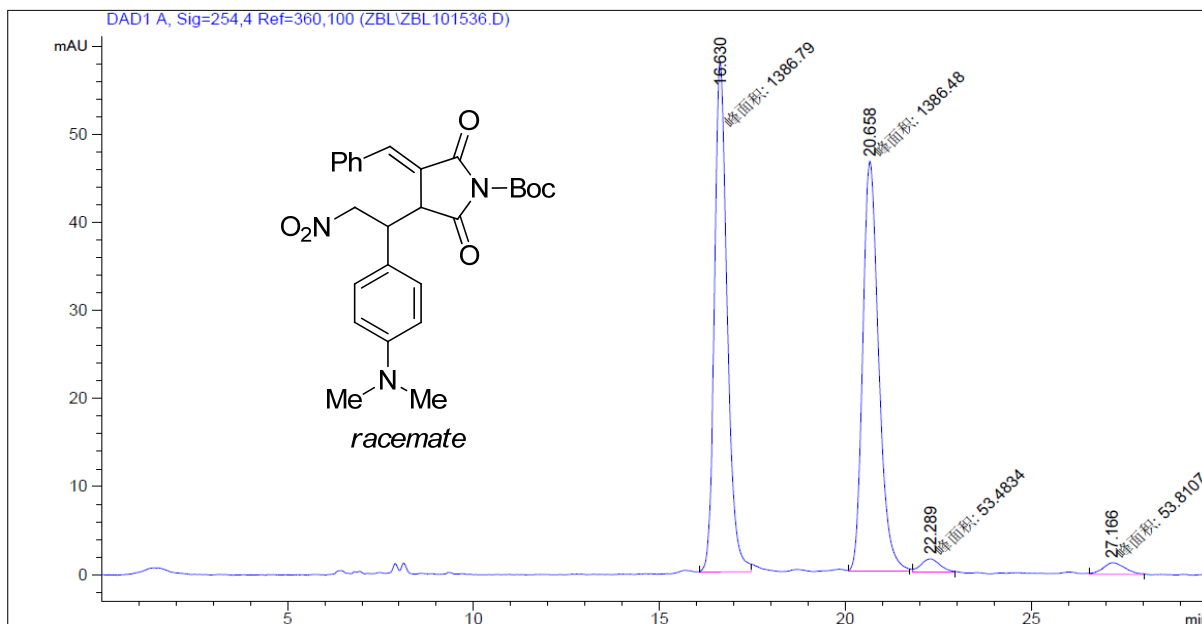

| Peak # | RetTime [min] | Type | Width [min] | Area [mAU*s] | Height [mAU] | Area %  |
|--------|---------------|------|-------------|--------------|--------------|---------|
| 1      | 16.630        | MM   | 0.3996      | 1386.79199   | 57.83700     | 48.1431 |
| 2      | 20.658        | MM   | 0.4966      | 1386.47583   | 46.53016     | 48.1321 |
| 3      | 22.289        | MM   | 0.5910      | 53.48343     | 1.50836      | 1.8567  |
| 4      | 27.166        | MM   | 0.6830      | 53.81073     | 1.31310      | 1.8681  |

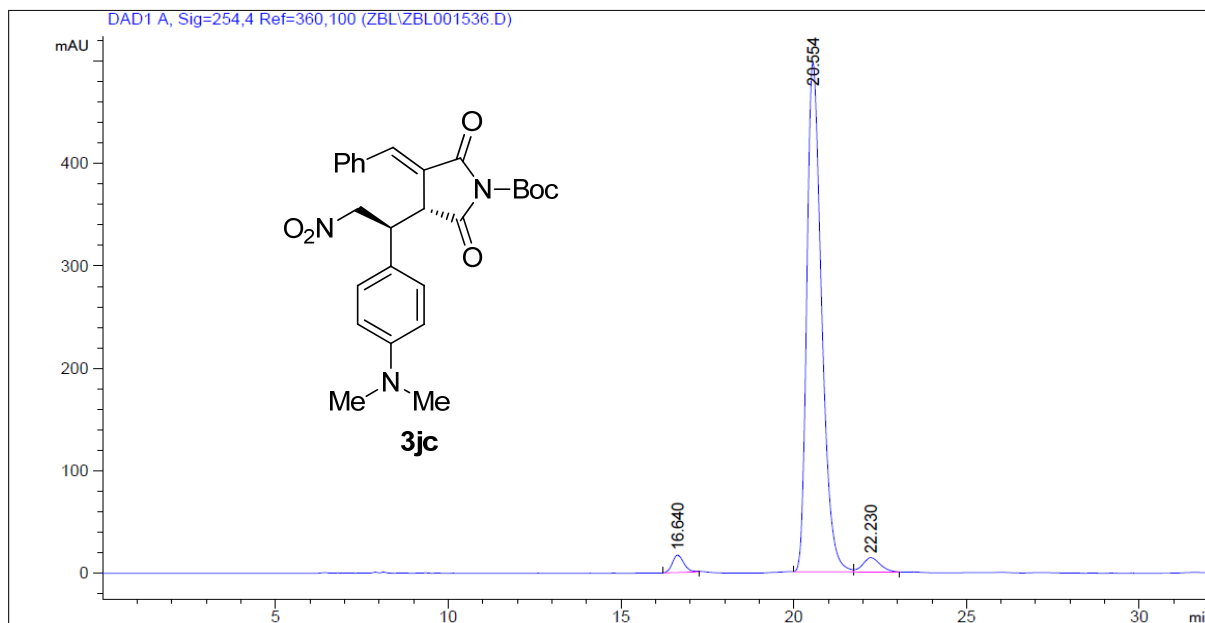

| Peak # | RetTime [min] | Type | Width [min] | Area [mAU*s] | Height [mAU] | Area %  |
|--------|---------------|------|-------------|--------------|--------------|---------|
| 1      | 16.640        | BB   | 0.3563      | 397.00647    | 17.01204     | 2.5274  |
| 2      | 20.554        | BB   | 0.4594      | 1.48128e4    | 497.48376    | 94.3005 |
| 3      | 22.230        | BB   | 0.5279      | 498.27512    | 14.11194     | 3.1721  |

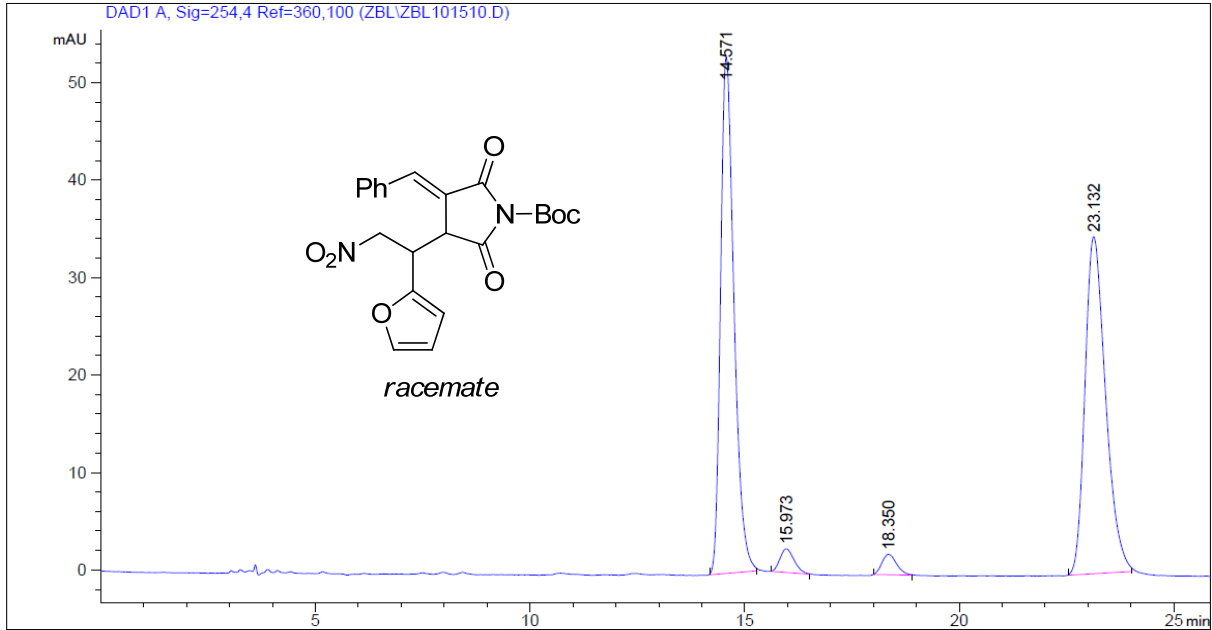

| Peak # | RetTime [min] | Type | Width [min] | Area [mAU*s] | Height [mAU] | Area %  |
|--------|---------------|------|-------------|--------------|--------------|---------|
| 1      | 14.571        | BB   | 0.3313      | 1152.19971   | 53.06300     | 47.7790 |
| 2      | 15.973        | BB   | 0.3236      | 55.75045     | 2.43080      | 2.3118  |
| 3      | 18.350        | BB   | 0.3247      | 49.94647     | 2.10588      | 2.0712  |
| 4      | 23.132        | BB   | 0.5131      | 1153.62292   | 34.58816     | 47.8380 |

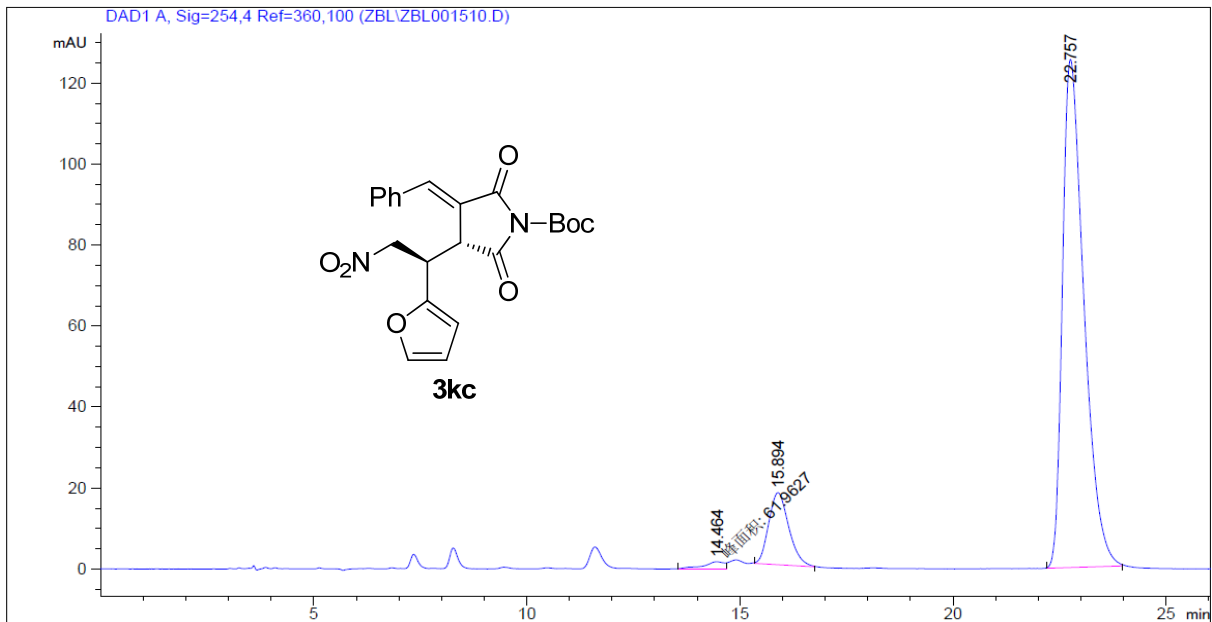

| Peak # | RetTime [min] | Type | Width [min] | Area [mAU*s] | Height [mAU] | Area %  |
|--------|---------------|------|-------------|--------------|--------------|---------|
| 1      | 14.464        | MM   | 0.5785      | 61.96268     | 1.78521      | 1.2309  |
| 2      | 15.894        | BB   | 0.4890      | 581.96527    | 17.82087     | 11.5608 |
| 3      | 22.757        | BB   | 0.5302      | 4390.03760   | 125.48440    | 87.2083 |

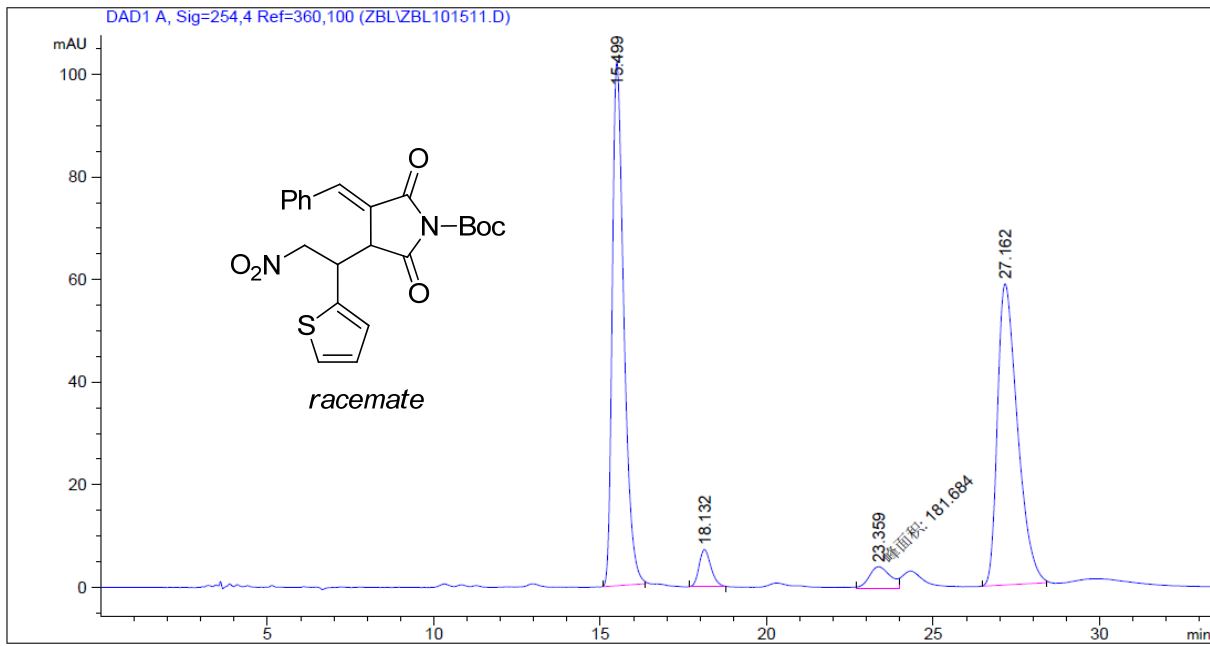

| Peak # | RetTime [min] | Type | Width [min] | Area [mAU*s] | Height [mAU] | Area %  |
|--------|---------------|------|-------------|--------------|--------------|---------|
| 1      | 15.499        | BB   | 0.3685      | 2473.88599   | 102.17088    | 46.7327 |
| 2      | 18.132        | BB   | 0.3681      | 179.91498    | 7.23605      | 3.3987  |
| 3      | 23.359        | MM   | 0.7313      | 181.68382    | 4.14074      | 3.4321  |
| 4      | 27.162        | BB   | 0.6306      | 2458.20947   | 58.69219     | 46.4366 |

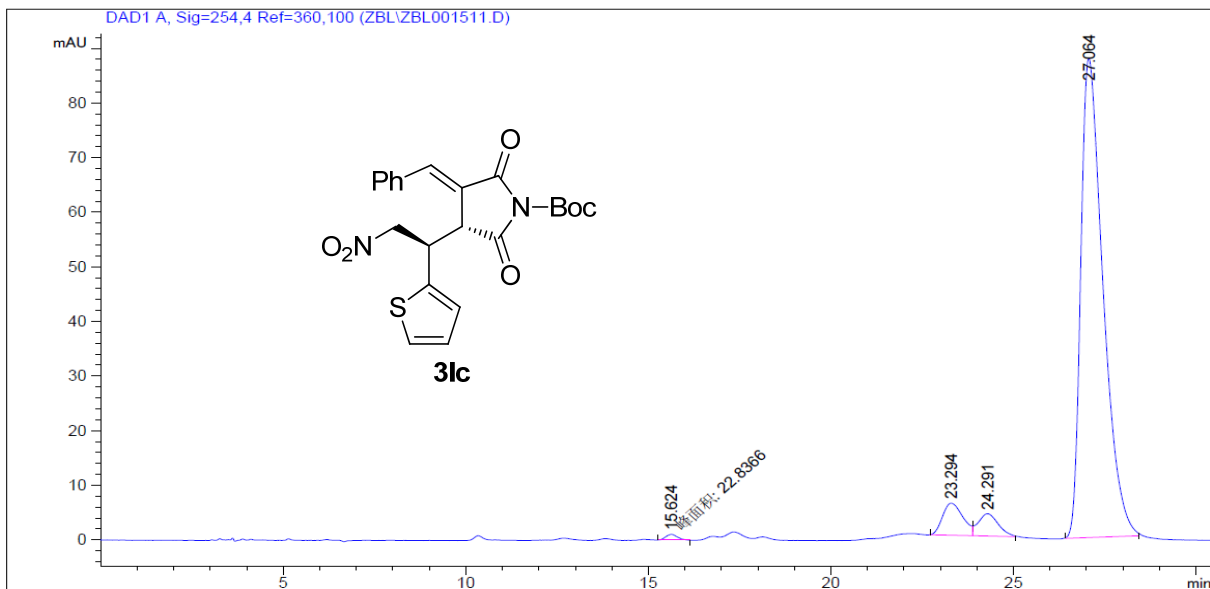

| Peak # | RetTime [min] | Type | Width [min] | Area [mAU*s] | Height [mAU] | Area %  |
|--------|---------------|------|-------------|--------------|--------------|---------|
| 1      | 15.624        | MM   | 0.3609      | 22.83657     | 1.05463      | 0.5547  |
| 2      | 23.294        | BV   | 0.5015      | 227.25681    | 5.87209      | 5.5197  |
| 3      | 24.291        | VB   | 0.4846      | 155.62320    | 4.08331      | 3.7798  |
| 4      | 27.064        | BB   | 0.6374      | 3711.49463   | 87.75254     | 90.1458 |



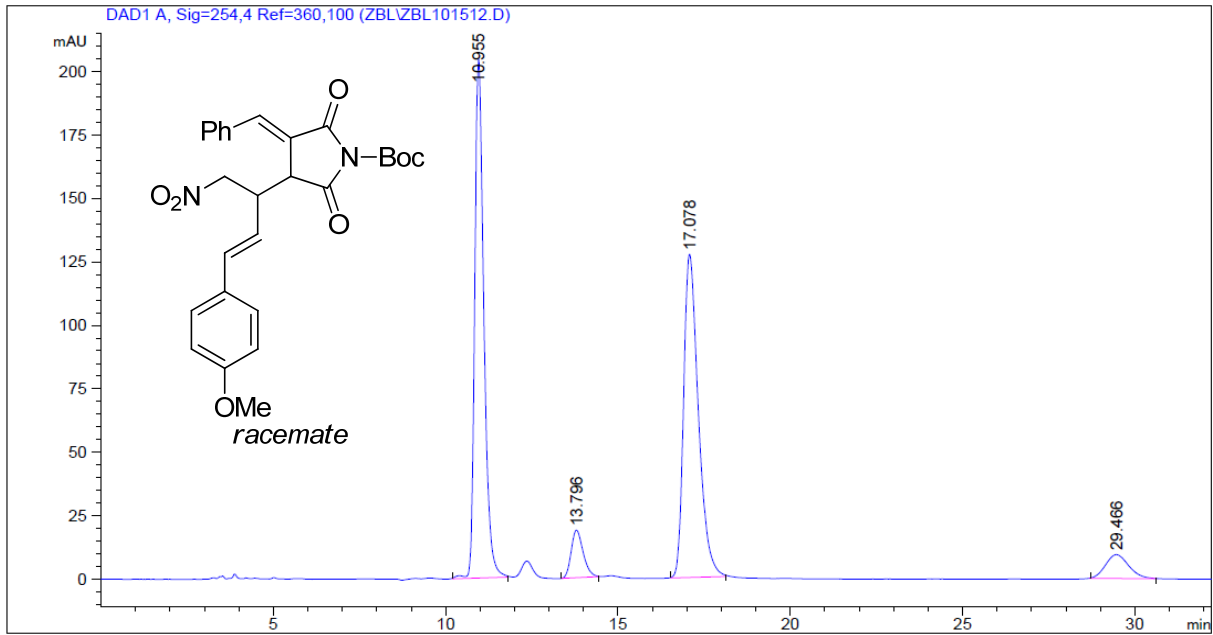

| Peak # | RetTime [min] | Type | Width [min] | Area [mAU*s] | Height [mAU] | Area %  |
|--------|---------------|------|-------------|--------------|--------------|---------|
| 1      | 10.955        | BB   | 0.2817      | 3782.07178   | 204.52385    | 44.7605 |
| 2      | 13.796        | BB   | 0.3714      | 451.97433    | 18.73966     | 5.3491  |
| 3      | 17.078        | BB   | 0.4519      | 3776.20581   | 127.37211    | 44.6911 |
| 4      | 29.466        | BB   | 0.6787      | 439.31561    | 9.37544      | 5.1993  |

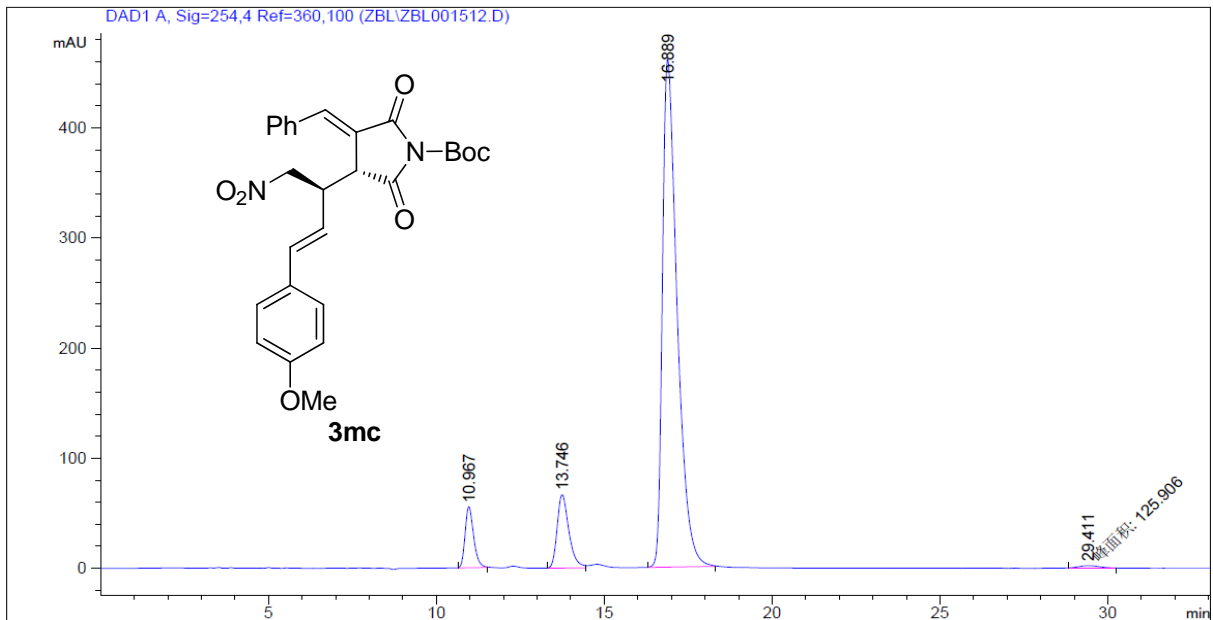

| Peak # | RetTime [min] | Type | Width [min] | Area [mAU*s] | Height [mAU] | Area %  |
|--------|---------------|------|-------------|--------------|--------------|---------|
| 1      | 10.967        | BB   | 0.2711      | 981.56384    | 55.30618     | 5.8537  |
| 2      | 13.746        | BB   | 0.3672      | 1618.33105   | 66.67809     | 9.6512  |
| 3      | 16.889        | BB   | 0.4592      | 1.40424e4    | 461.18542    | 83.7443 |
| 4      | 29.411        | MM   | 0.8189      | 125.90567    | 2.56238      | 0.7509  |

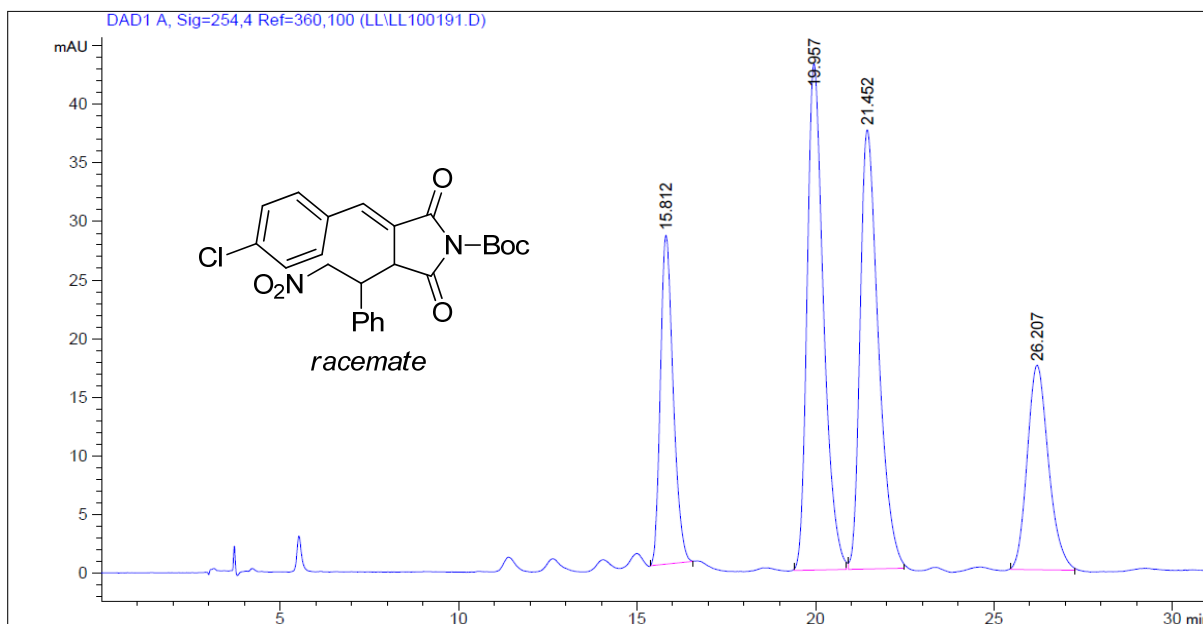

| Peak # | RetTime [min] | Type | Width [min] | Area [mAU*s] | Height [mAU] | Area %  |
|--------|---------------|------|-------------|--------------|--------------|---------|
| 1      | 15.812        | BB   | 0.3745      | 699.23291    | 28.08502     | 16.8597 |
| 2      | 19.957        | BB   | 0.4882      | 1386.14807   | 43.22046     | 33.4225 |
| 3      | 21.452        | BB   | 0.5342      | 1337.27173   | 37.48706     | 32.2440 |
| 4      | 26.207        | BB   | 0.6161      | 724.69843    | 17.46672     | 17.4738 |

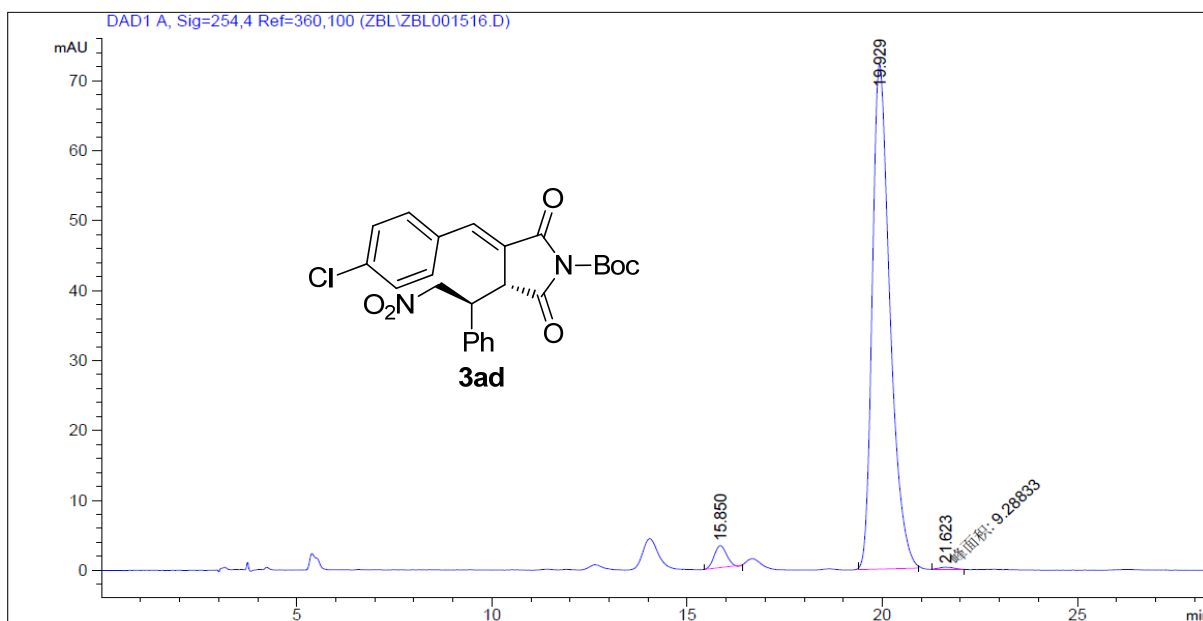

| Peak # | RetTime [min] | Type | Width [min] | Area [mAU*s] | Height [mAU] | Area %  |
|--------|---------------|------|-------------|--------------|--------------|---------|
| 1      | 15.850        | BB   | 0.3181      | 67.60826     | 3.12881      | 2.8625  |
| 2      | 19.929        | BB   | 0.4811      | 2284.92871   | 72.21793     | 96.7442 |
| 3      | 21.623        | MM   | 0.4625      | 9.28833      | 3.34744e-1   | 0.3933  |

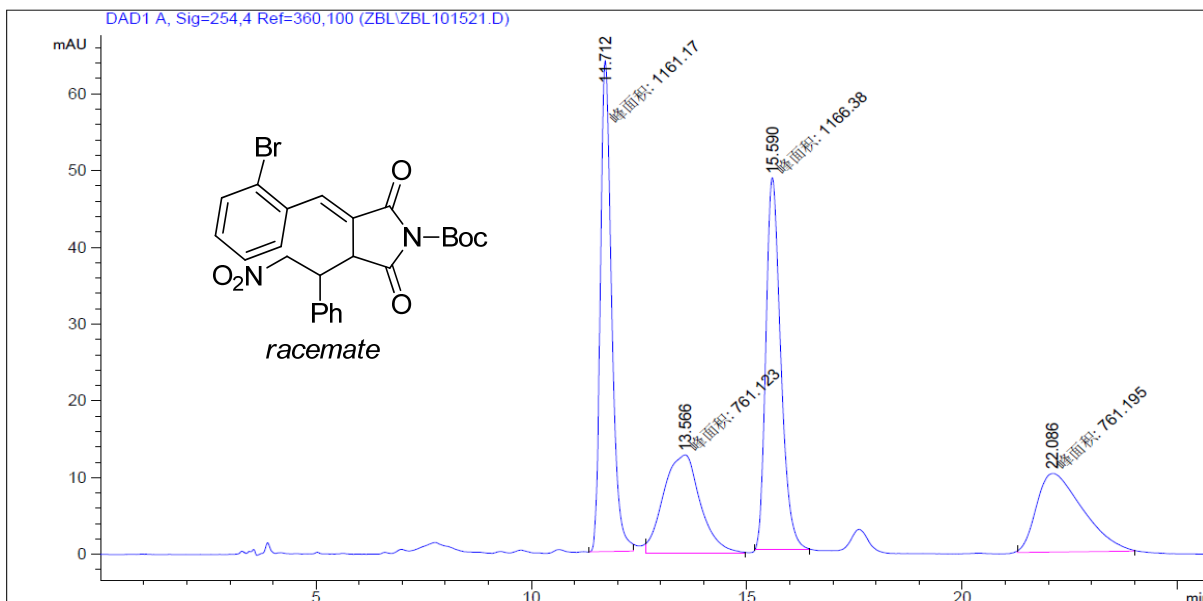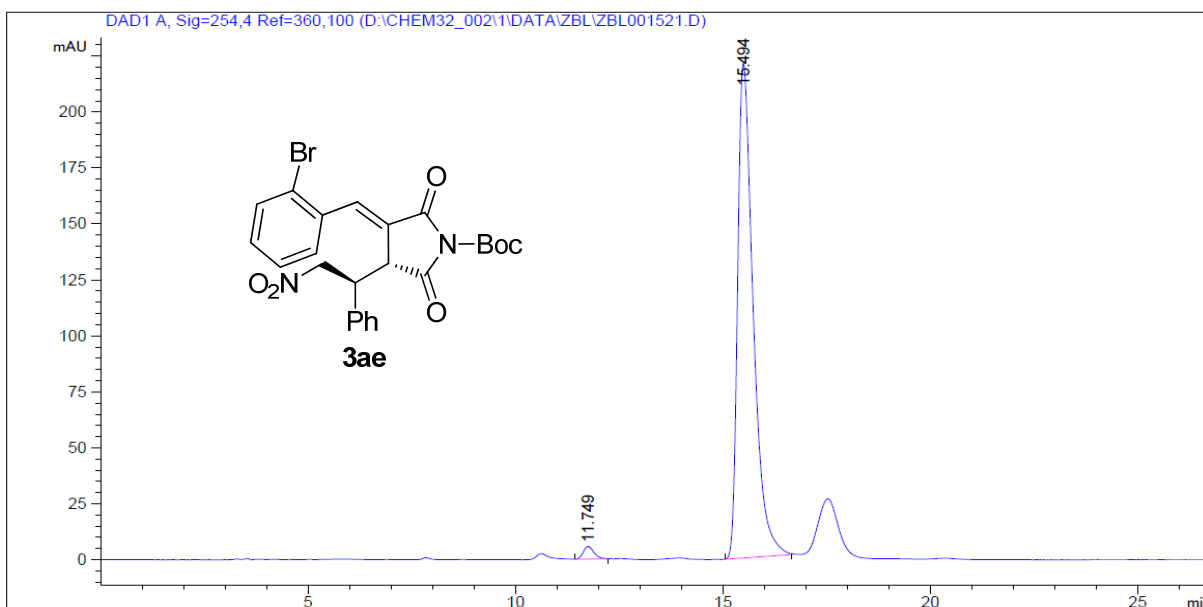

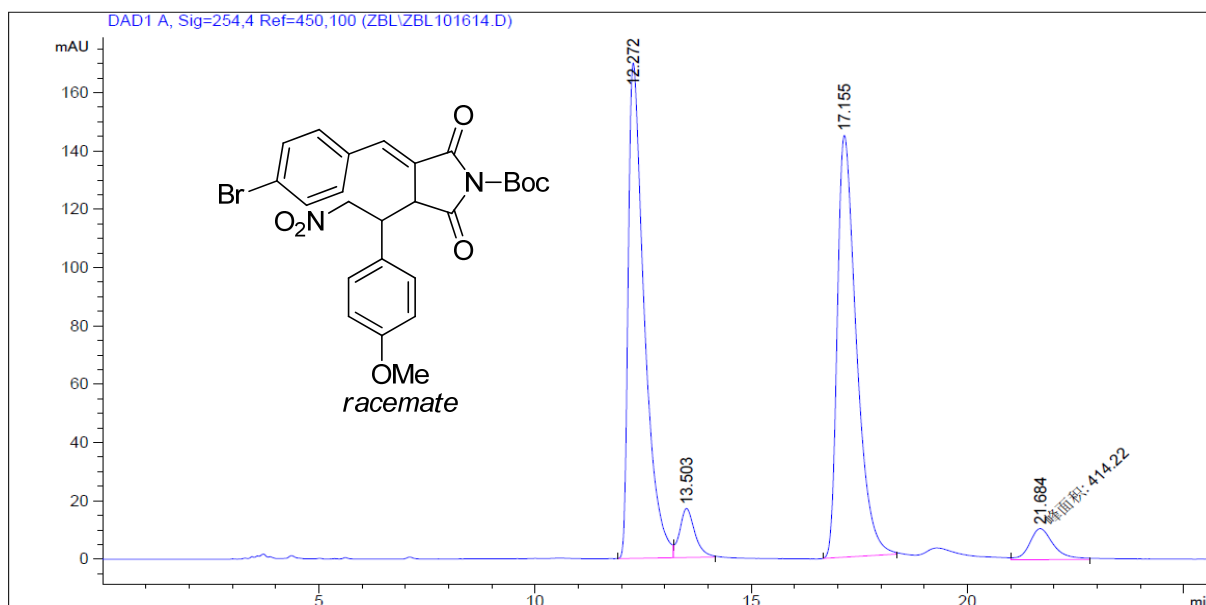

| Peak # | RetTime [min] | Type | Width [min] | Area [mAU*s] | Height [mAU] | Area %  |
|--------|---------------|------|-------------|--------------|--------------|---------|
| 1      | 12.272        | BV   | 0.3835      | 4390.82178   | 169.88310    | 45.4988 |
| 2      | 13.503        | VB   | 0.3651      | 414.06360    | 16.82564     | 4.2906  |
| 3      | 17.155        | BB   | 0.4613      | 4431.31250   | 144.67480    | 45.9183 |
| 4      | 21.684        | MM   | 0.6475      | 414.21970    | 10.66220     | 4.2922  |

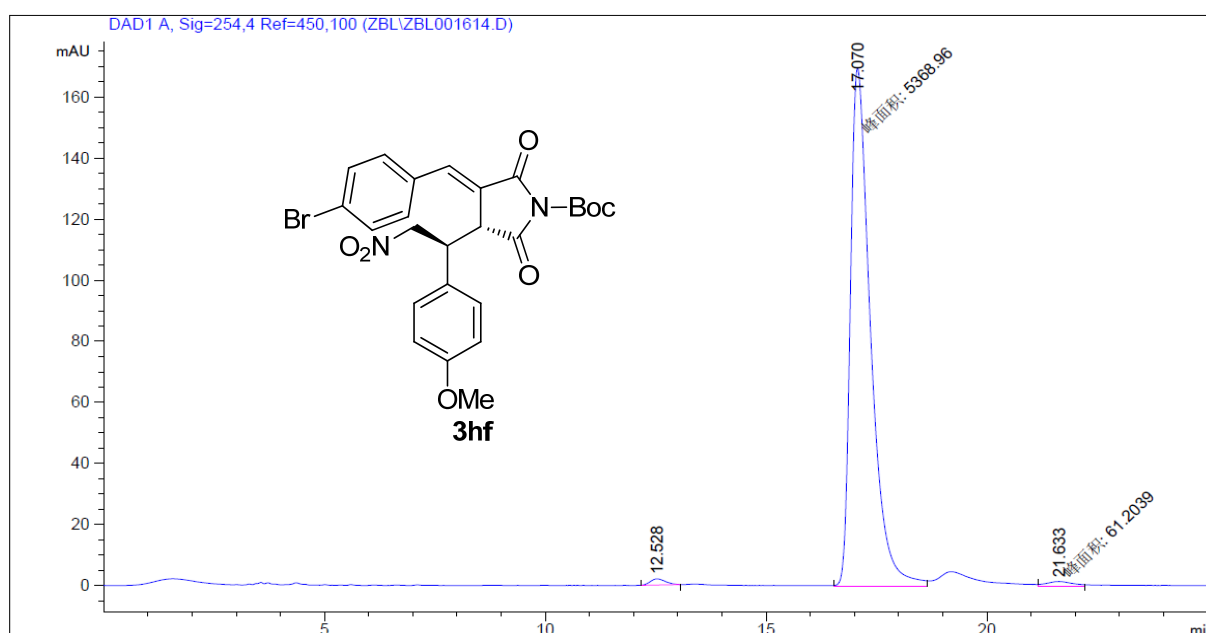

| Peak # | RetTime [min] | Type | Width [min] | Area [mAU*s] | Height [mAU] | Area %  |
|--------|---------------|------|-------------|--------------|--------------|---------|
| 1      | 12.528        | BB   | 0.3297      | 47.71120     | 2.00445      | 0.8710  |
| 2      | 17.070        | MM   | 0.5273      | 5368.96045   | 169.69423    | 98.0117 |
| 3      | 21.633        | MM   | 0.6826      | 61.20391     | 1.49433      | 1.1173  |

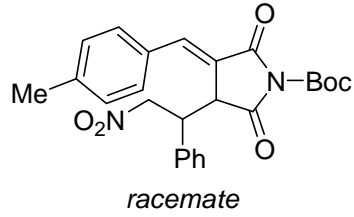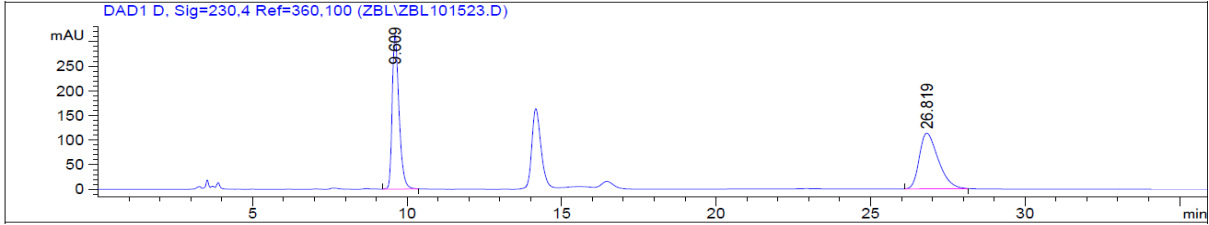

| Peak # | RetTime [min] | Type | Width [min] | Area [mAU*s] | Height [mAU] | Area %  |
|--------|---------------|------|-------------|--------------|--------------|---------|
| 1      | 9.609         | BB   | 0.2337      | 4833.29980   | 313.86353    | 50.0648 |
| 2      | 26.819        | BB   | 0.6523      | 4820.79687   | 113.32423    | 49.9352 |

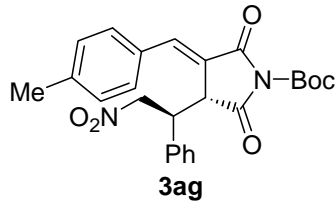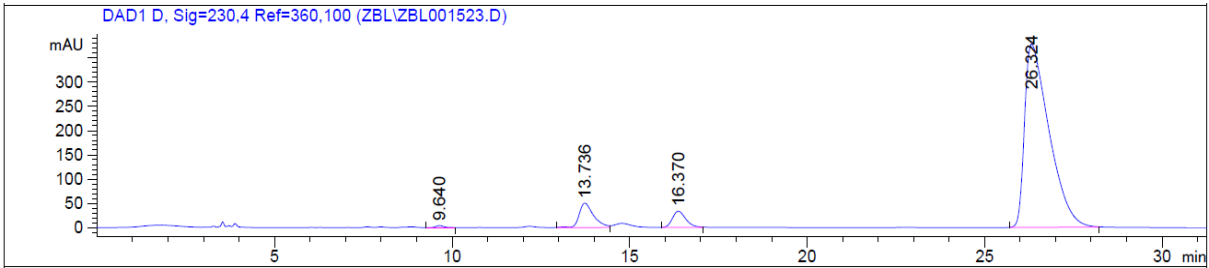

| Peak # | RetTime [min] | Type | Width [min] | Area [mAU*s] | Height [mAU] | Area %  |
|--------|---------------|------|-------------|--------------|--------------|---------|
| 1      | 9.640         | VB   | 0.2326      | 65.32833     | 4.26638      | 0.3189  |
| 2      | 13.736        | BV   | 0.4244      | 1425.25916   | 50.31973     | 6.9575  |
| 3      | 16.370        | BB   | 0.4002      | 871.13275    | 33.41497     | 4.2525  |
| 4      | 26.324        | BB   | 0.7165      | 1.81235e4    | 378.56329    | 88.4711 |

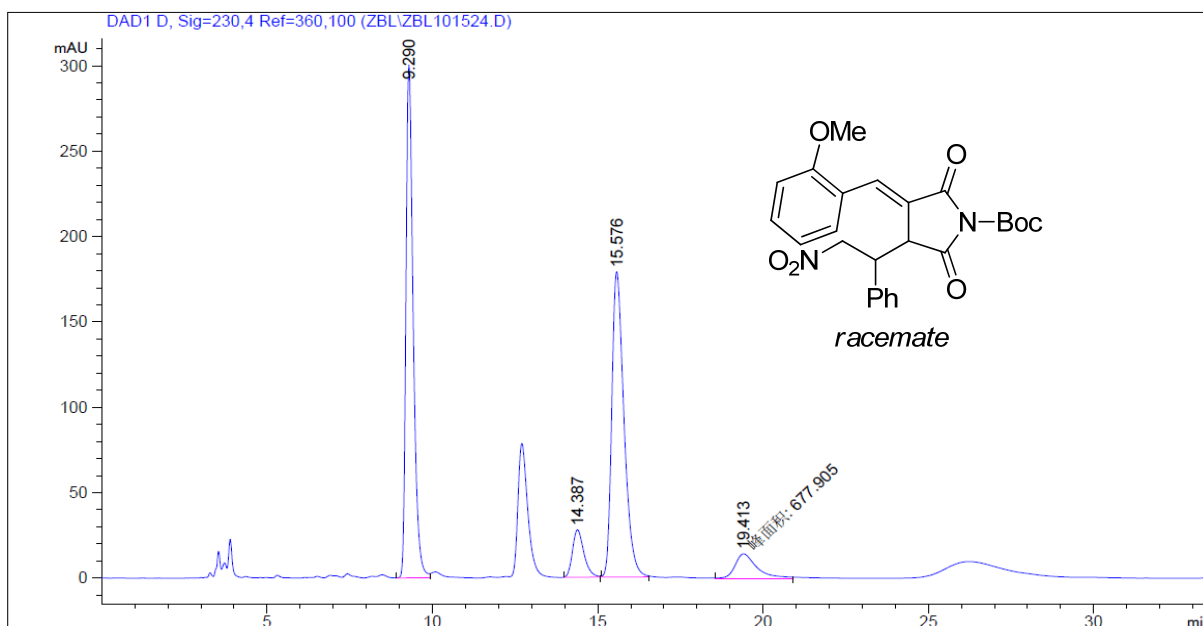

| Peak # | RetTime [min] | Type | Width [min] | Area [mAU*s] | Height [mAU] | Area %  |
|--------|---------------|------|-------------|--------------|--------------|---------|
| 1      | 9.290         | VB   | 0.2299      | 4583.59375   | 300.56076    | 43.5938 |
| 2      | 14.387        | BB   | 0.3637      | 668.47162    | 27.88285     | 6.3577  |
| 3      | 15.576        | BB   | 0.3890      | 4584.35352   | 178.84978    | 43.6010 |
| 4      | 19.413        | MM   | 0.7758      | 677.90491    | 14.56275     | 6.4474  |

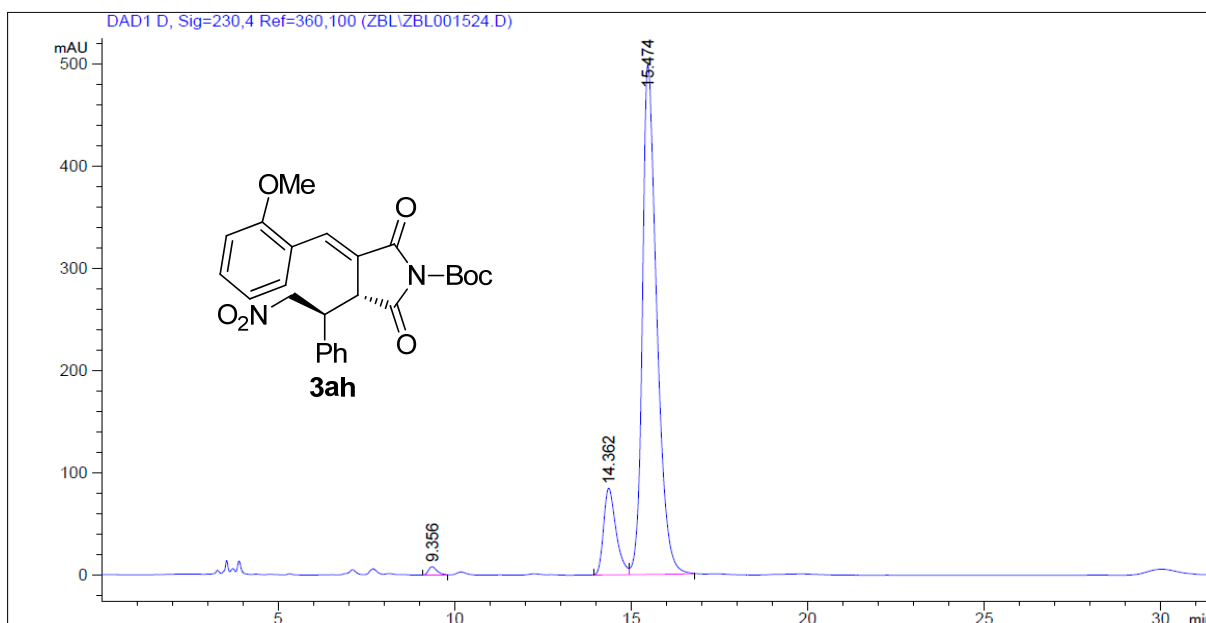

| Peak # | RetTime [min] | Type | Width [min] | Area [mAU*s] | Height [mAU] | Area %  |
|--------|---------------|------|-------------|--------------|--------------|---------|
| 1      | 9.356         | BB   | 0.2555      | 142.78436    | 8.34804      | 0.8715  |
| 2      | 14.362        | BV   | 0.3727      | 2088.34399   | 84.98019     | 12.7458 |
| 3      | 15.474        | VB   | 0.4245      | 1.41534e4    | 499.67642    | 86.3827 |

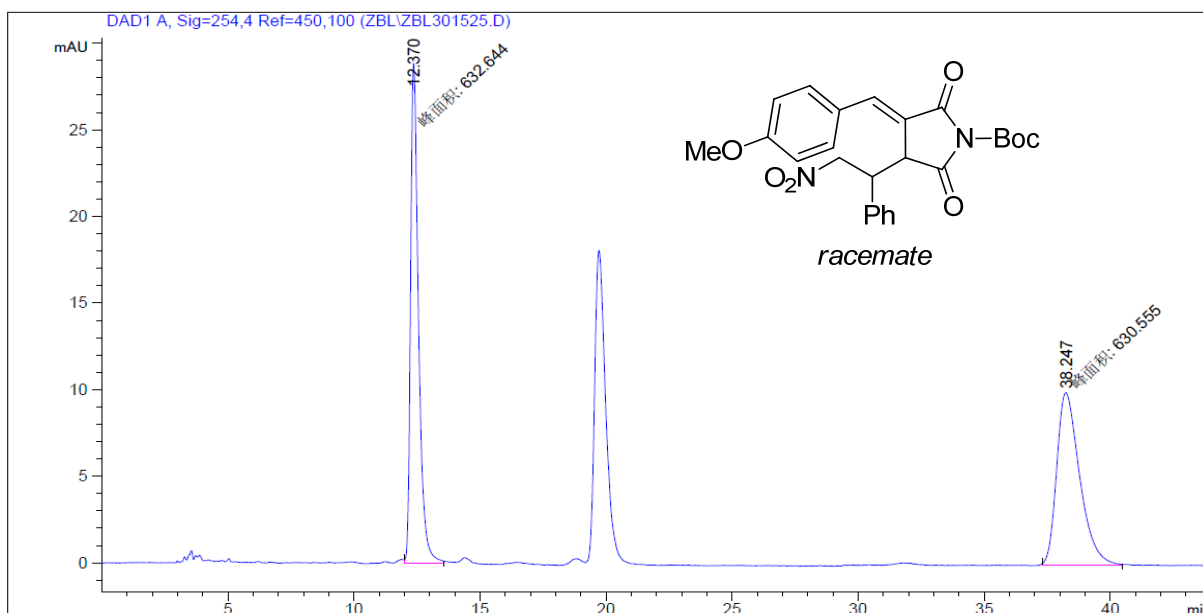

| Peak # | RetTime [min] | Type | Width [min] | Area [mAU*s] | Height [mAU] | Area %  |
|--------|---------------|------|-------------|--------------|--------------|---------|
| 1      | 12.370        | MM   | 0.3652      | 632.64392    | 28.87119     | 50.0827 |
| 2      | 38.247        | MM   | 1.0560      | 630.55536    | 9.95201      | 49.9173 |

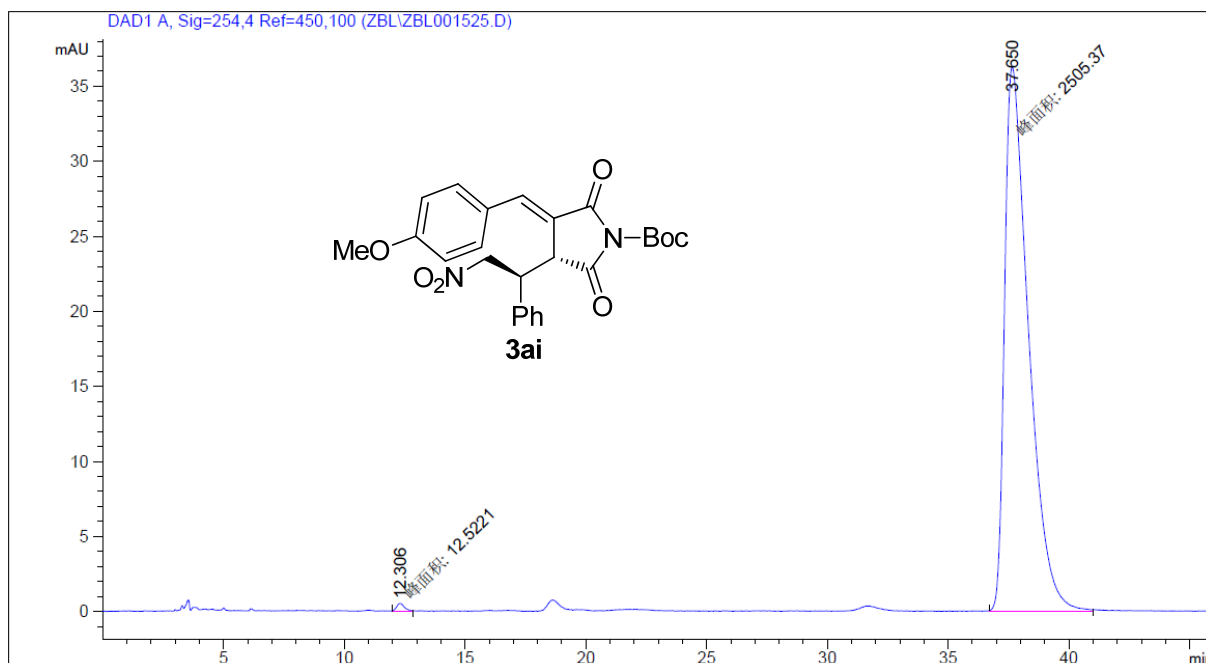

| Peak # | RetTime [min] | Type | Width [min] | Area [mAU*s] | Height [mAU] | Area %  |
|--------|---------------|------|-------------|--------------|--------------|---------|
| 1      | 12.306        | MM   | 0.3936      | 12.52206     | 5.30205e-1   | 0.4973  |
| 2      | 37.650        | MM   | 1.1503      | 2505.37158   | 36.29874     | 99.5027 |

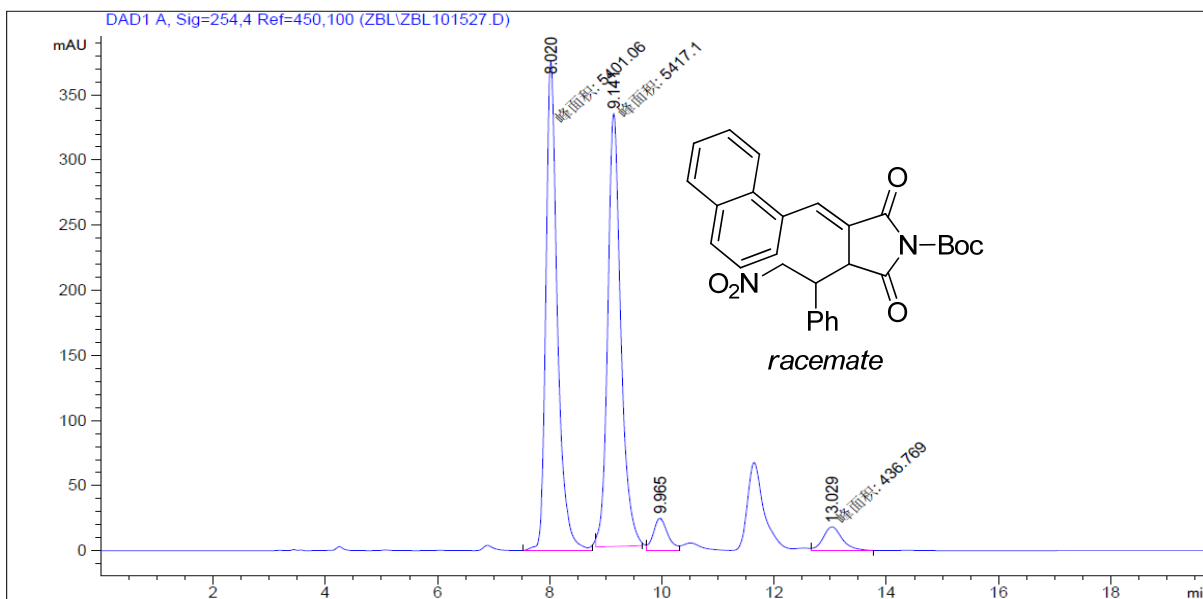

| Peak # | RetTime [min] | Type | Width [min] | Area [mAU*s] | Height [mAU] | Area %  |
|--------|---------------|------|-------------|--------------|--------------|---------|
| 1      | 8.020         | MM   | 0.2395      | 5401.06396   | 375.89597    | 46.1841 |
| 2      | 9.141         | MM   | 0.2714      | 5417.09961   | 332.67834    | 46.3212 |
| 3      | 9.965         | VV   | 0.2674      | 439.70566    | 24.72864     | 3.7599  |
| 4      | 13.029        | MM   | 0.3979      | 436.76883    | 18.29449     | 3.7348  |

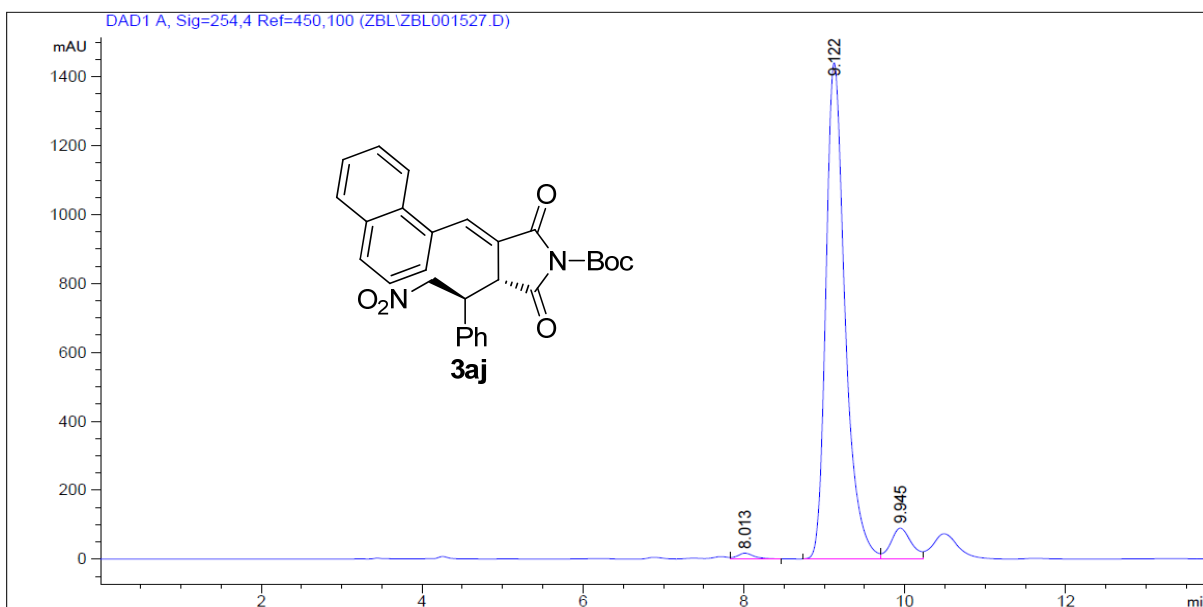

| Peak # | RetTime [min] | Type | Width [min] | Area [mAU*s] | Height [mAU] | Area %  |
|--------|---------------|------|-------------|--------------|--------------|---------|
| 1      | 8.013         | VB   | 0.2221      | 259.92325    | 17.22486     | 1.0078  |
| 2      | 9.122         | BV   | 0.2519      | 2.39445e4    | 1440.95374   | 92.8400 |
| 3      | 9.945         | VV   | 0.2656      | 1586.71729   | 90.04076     | 6.1522  |



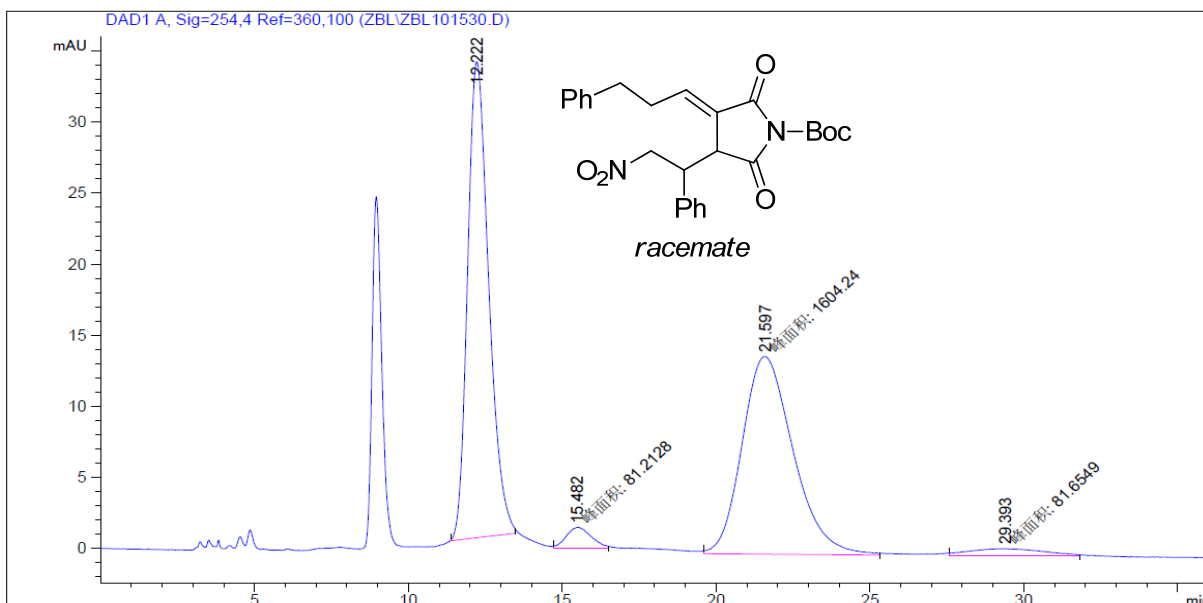

| Peak # | RetTime [min] | Type | Width [min] | Area [mAU*s] | Height [mAU] | Area %  |
|--------|---------------|------|-------------|--------------|--------------|---------|
| 1      | 12.222        | BB   | 0.7232      | 1599.94739   | 33.50122     | 47.5178 |
| 2      | 15.482        | MM   | 0.9367      | 81.21283     | 1.44500      | 2.4120  |
| 3      | 21.597        | MM   | 1.9220      | 1604.23694   | 13.91150     | 47.6451 |
| 4      | 29.393        | MM   | 2.7349      | 81.65488     | 4.97617e-1   | 2.4251  |

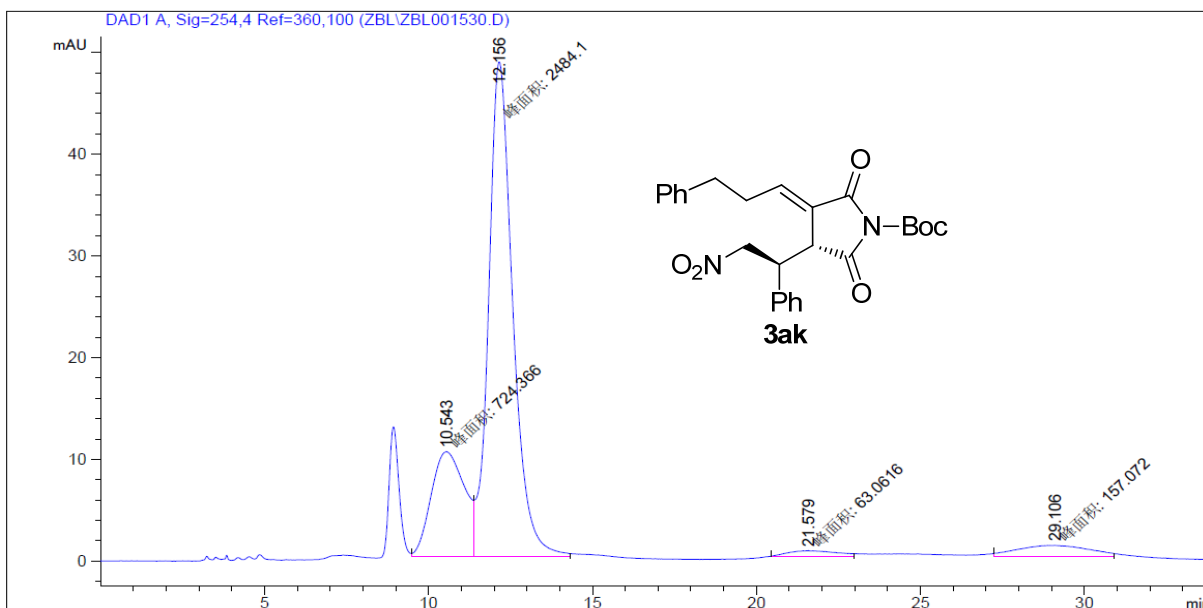

| Peak # | RetTime [min] | Type | Width [min] | Area [mAU*s] | Height [mAU] | Area %  |
|--------|---------------|------|-------------|--------------|--------------|---------|
| 1      | 10.543        | MM   | 1.1752      | 724.36591    | 10.27259     | 21.1272 |
| 2      | 12.156        | MM   | 0.8523      | 2484.10107   | 48.57589     | 72.4523 |
| 3      | 21.579        | MM   | 1.7693      | 63.06158     | 5.94041e-1   | 1.8393  |
| 4      | 29.106        | MM   | 2.5022      | 157.07245    | 1.04623      | 4.5812  |

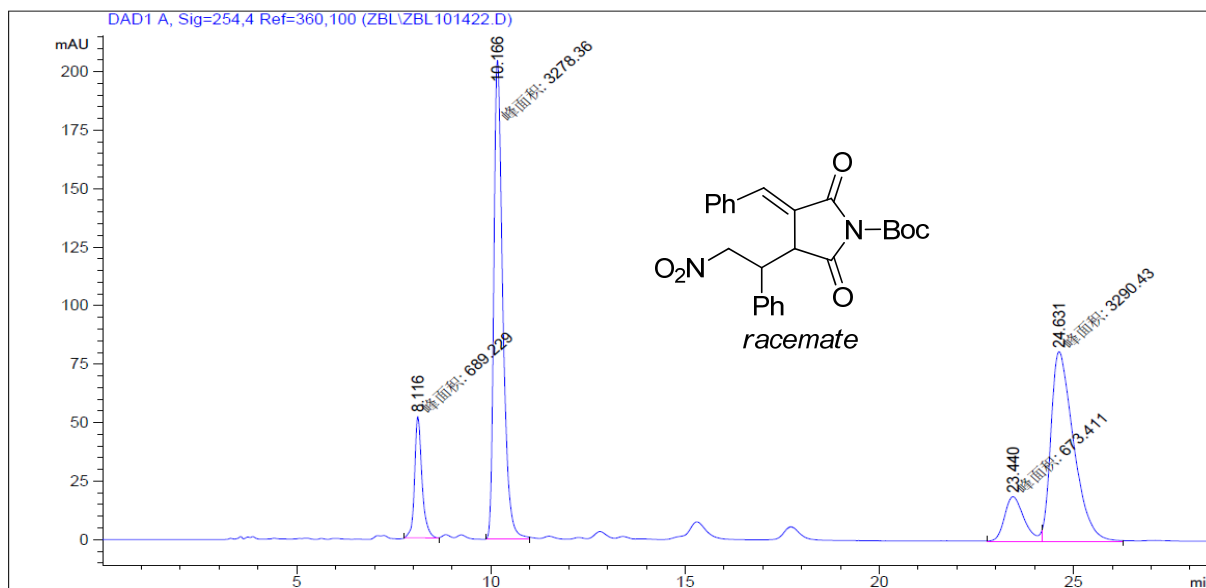

| Peak # | RetTime [min] | Type | Width [min] | Area [mAU*s] | Height [mAU] | Area %  |
|--------|---------------|------|-------------|--------------|--------------|---------|
| 1      | 8.116         | MM   | 0.2216      | 689.22876    | 51.83558     | 8.6898  |
| 2      | 10.166        | MM   | 0.2670      | 3278.36060   | 204.65494    | 41.3338 |
| 3      | 23.440        | MM   | 0.5876      | 673.41064    | 19.09912     | 8.4904  |
| 4      | 24.631        | MM   | 0.6769      | 3290.42944   | 81.01297     | 41.4860 |

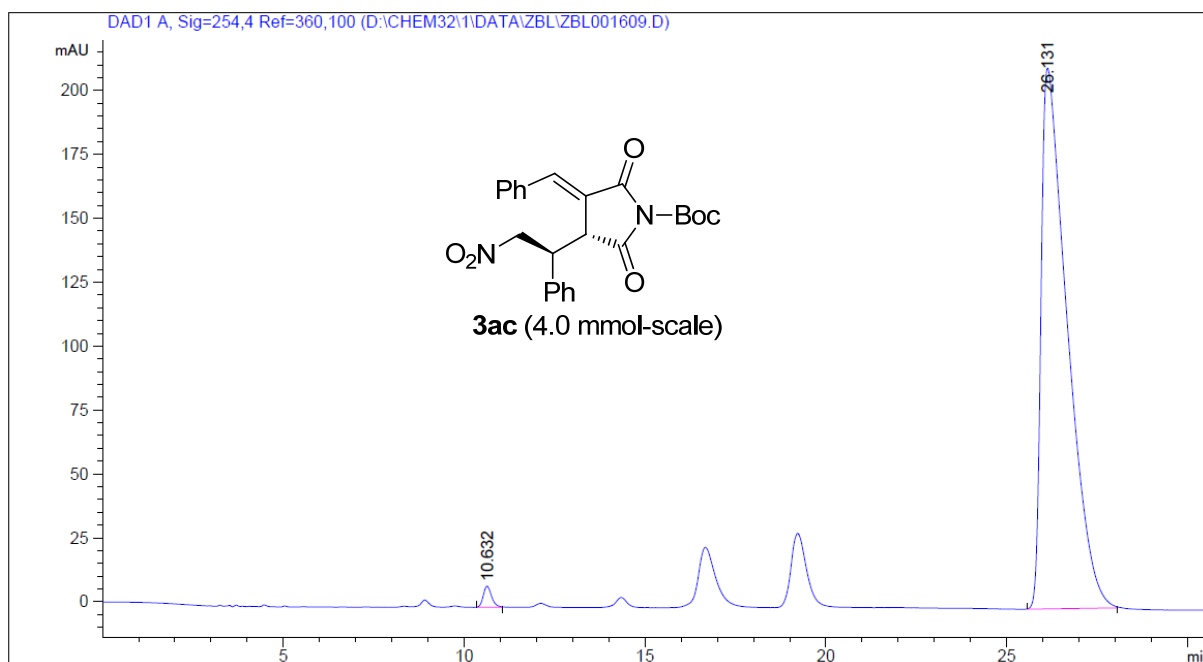

| Peak # | RetTime [min] | Type | Width [min] | Area [mAU*s] | Height [mAU] | Area %  |
|--------|---------------|------|-------------|--------------|--------------|---------|
| 1      | 10.632        | BB   | 0.2432      | 130.88290    | 8.24389      | 1.2188  |
| 2      | 26.131        | BB   | 0.7290      | 1.06081e4    | 211.56175    | 98.7812 |
